# Supplementary material
Source: ML conference proceedings conference paper supplement (https://openreview.net/forum?id=L5fkzfdSsZ)

Class

Legal finalization and so...

29/37

Sow iteration

7/20

Sow kickoff and order for...

6/20

Legal finalization and ms...

0/1

First pass contract revie...

0/1

Msa contract iteration

0/1

Contract kickoff

0/22

0%

25%

50%

75%

100%

Accuracy

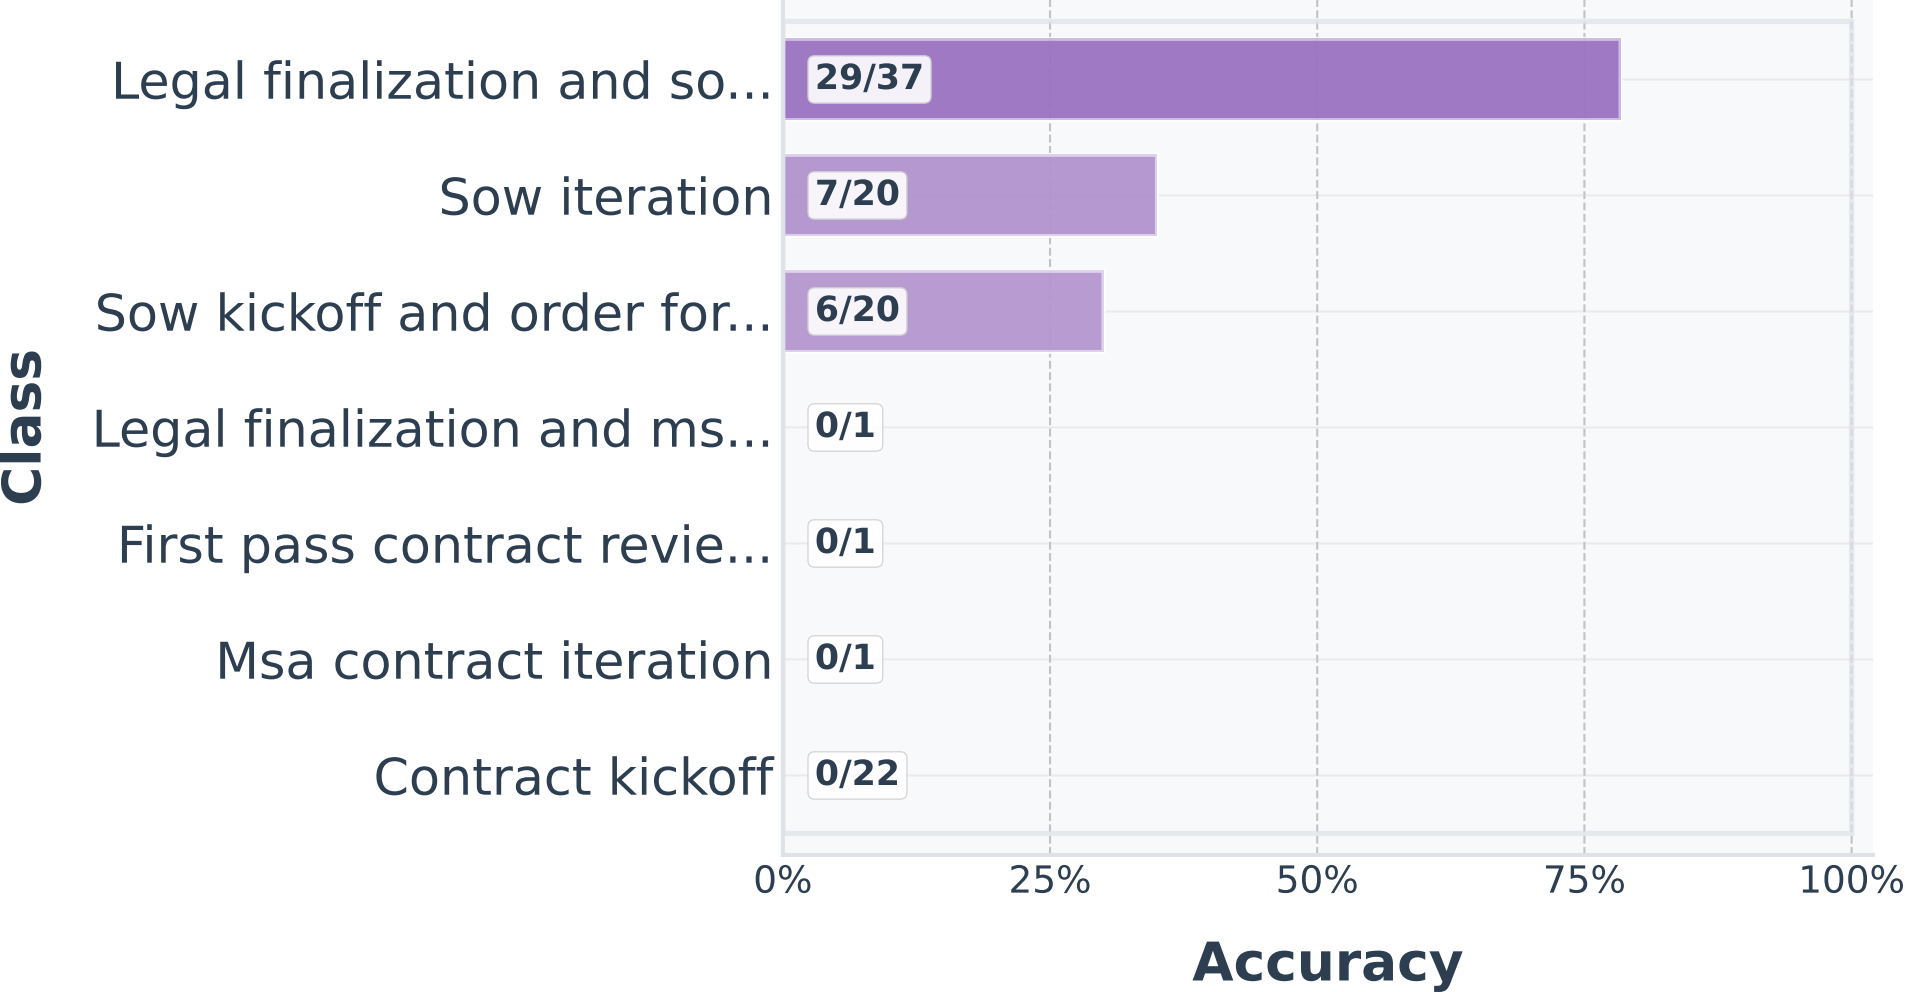

Supplement: supplementary_material [file legal_classification_Qwen3-32B_class_accuracy.pdf › entrophy-main/figures/legal_classification_Qwen3-32B_class_accuracy.pdf]
