# Supplementary material
Source: ML conference proceedings conference paper supplement (https://openreview.net/forum?id=L5fkzfdSsZ)
Supplement: supplementary_material [file legal_classification_Qwen3-32B_confusion.pdf › entrophy-main/figures/legal_classification_Qwen3-32B_confusion.pdf]

True Class

Sow kickoff and orde...  
Contract kickoff  
Legal finalization a...  
Msa contract iterati...  
Sow iteration  
First pass contract ...  
Legal finalization a...

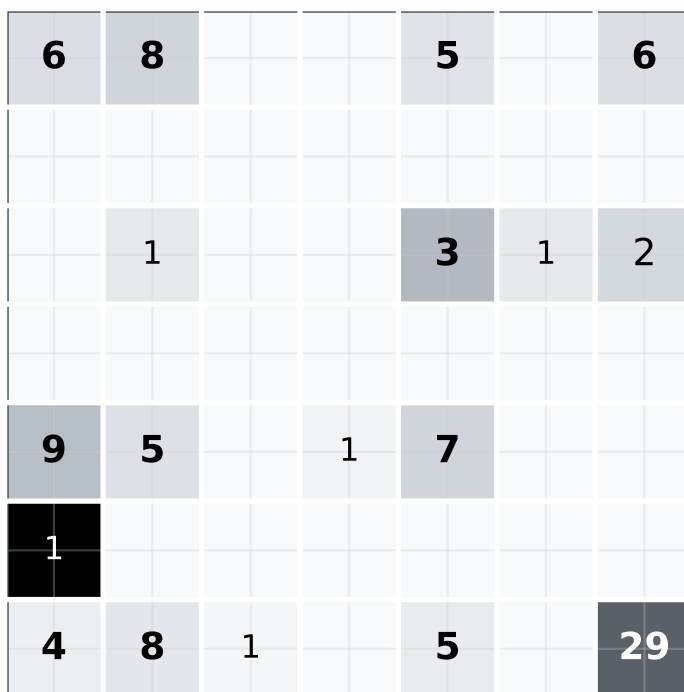

Sow kickoff and orde...  
Contract kickoff  
Legal finalization a...  
Msa contract iterati...  
Sow iteration  
First pass contract ...  
Legal finalization a...

Predicted Class

Percentage of True Class (%)
