# Supplementary material
Source: ML conference proceedings conference paper supplement (https://openreview.net/forum?id=L5fkzfdSsZ)

Finance

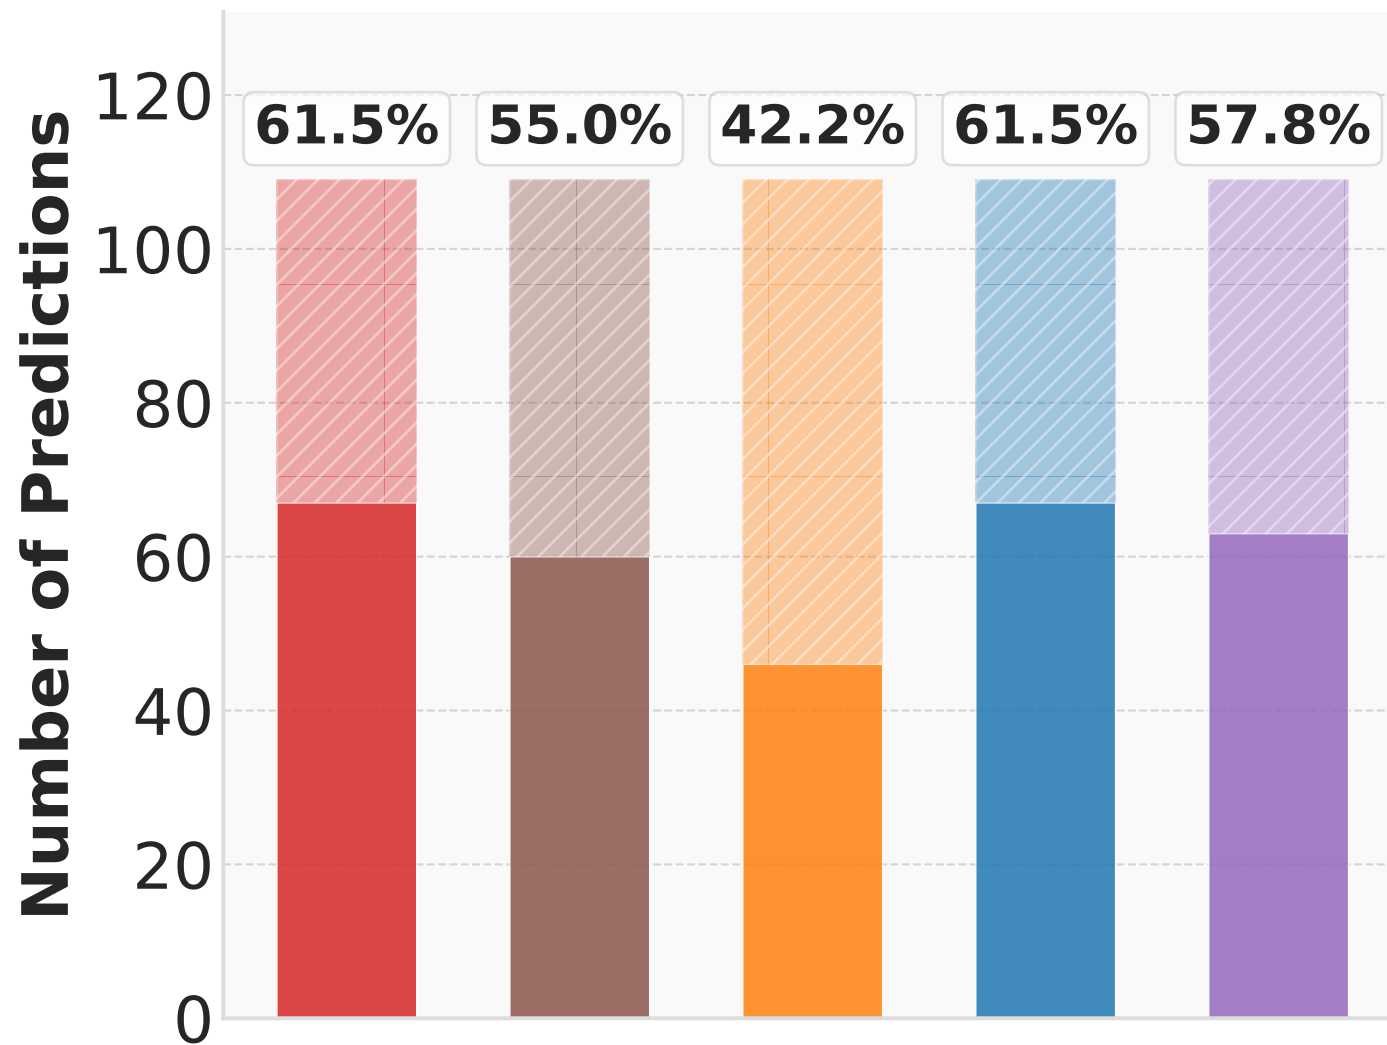

HR

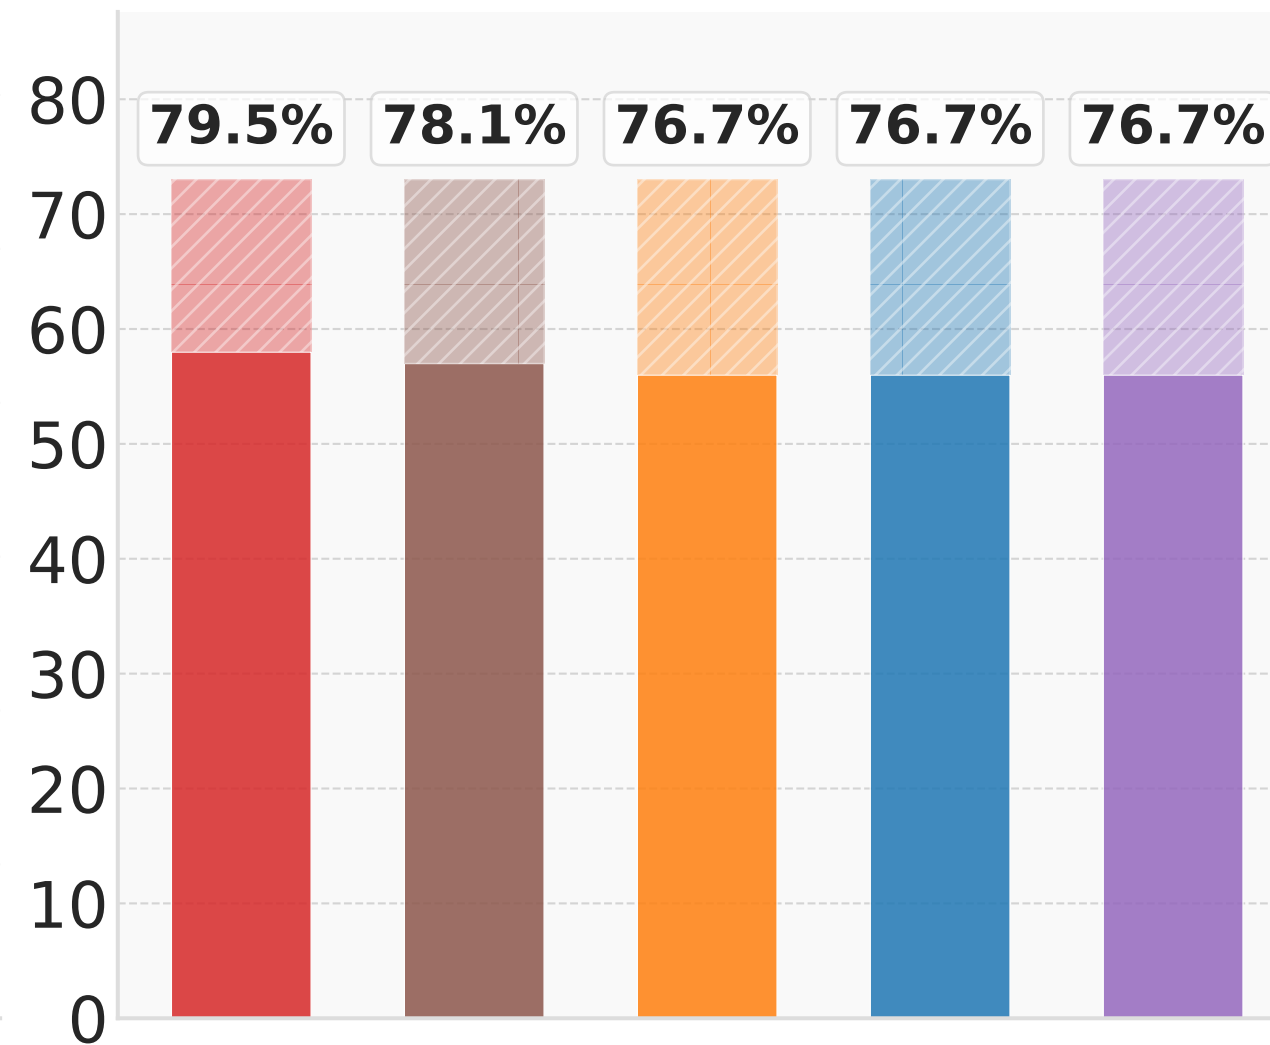

Legal

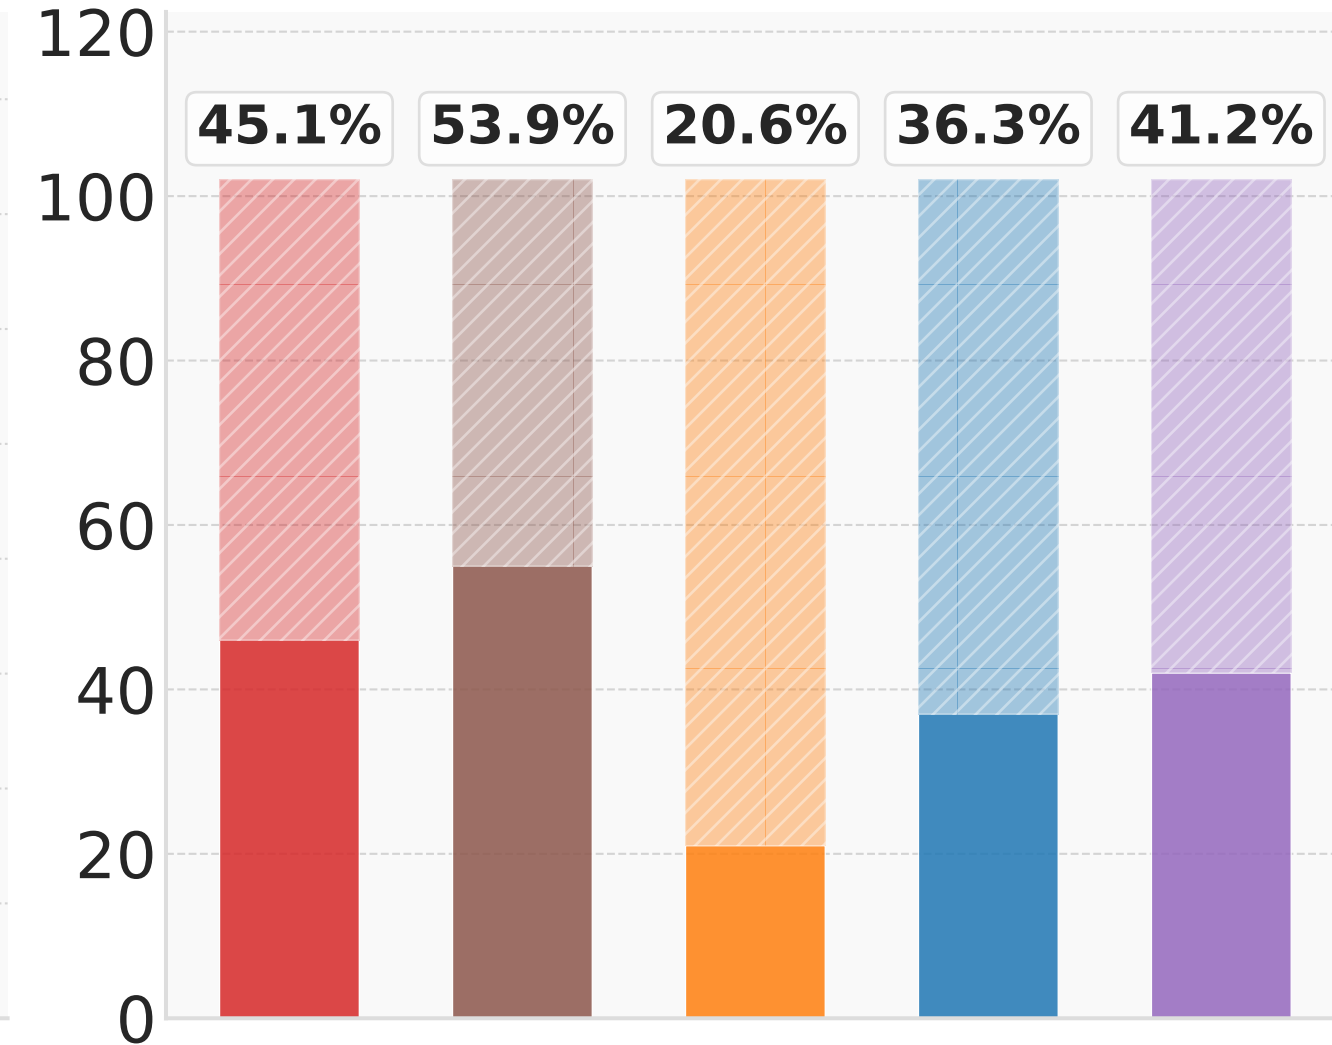

Qwen3-32B Claude-3.5-Haiku DeepSeek-R1 Gemini-2.5-Flash GPT-4.1

Correct Incorrect

Supplement: supplementary_material [file domain_detailed_accuracy_subplots.pdf › entrophy-main/figures/domain_detailed_accuracy_subplots.pdf]

**Finance**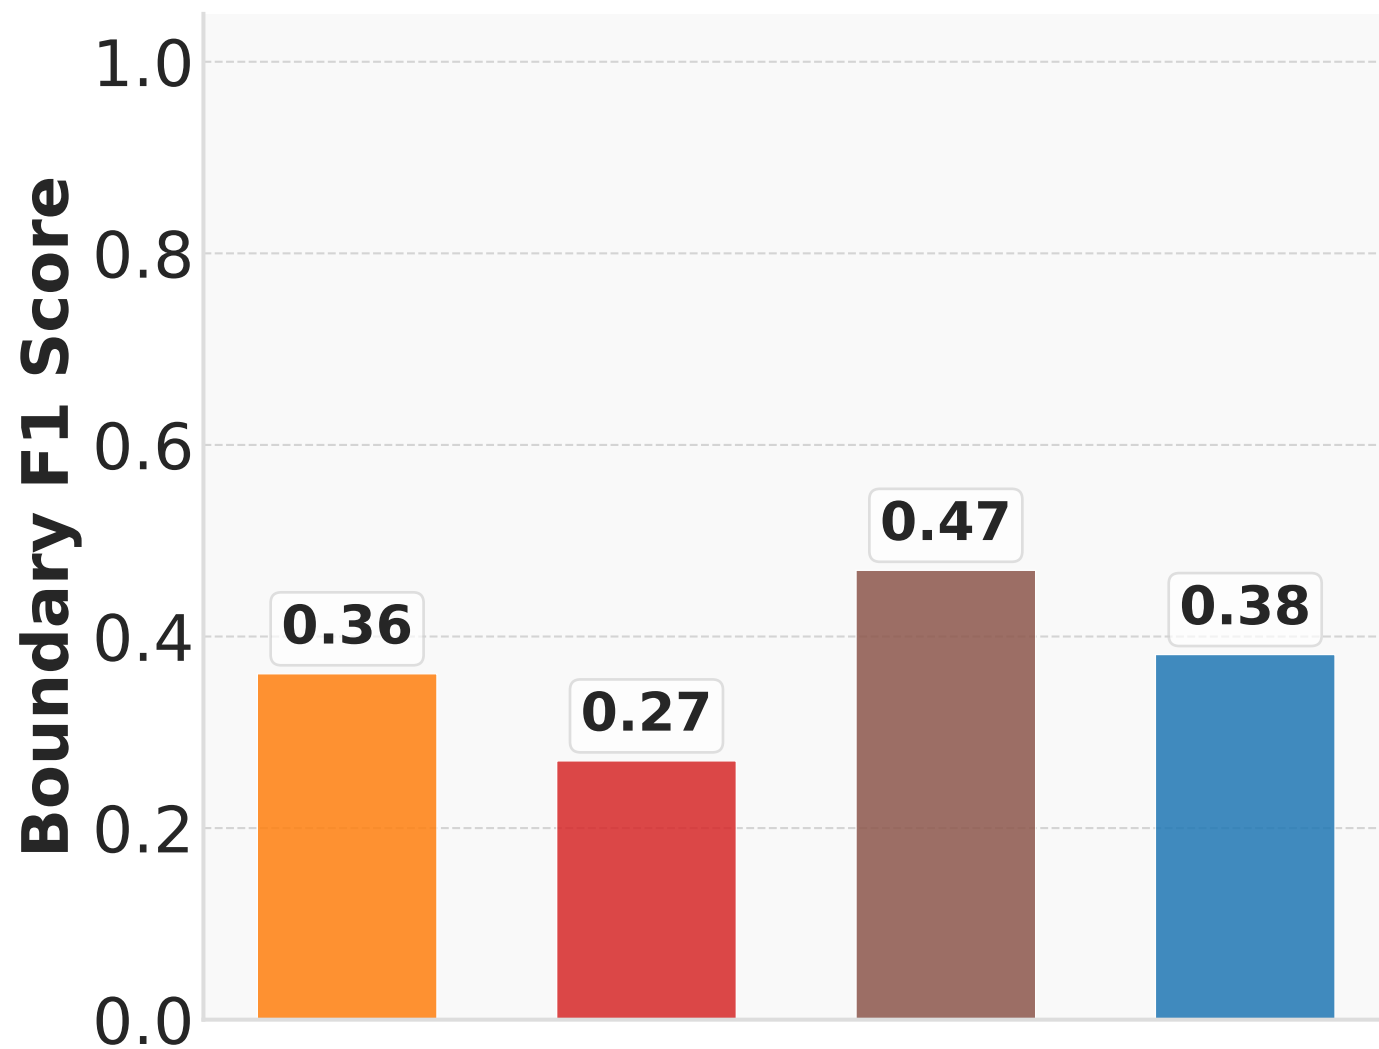**HR**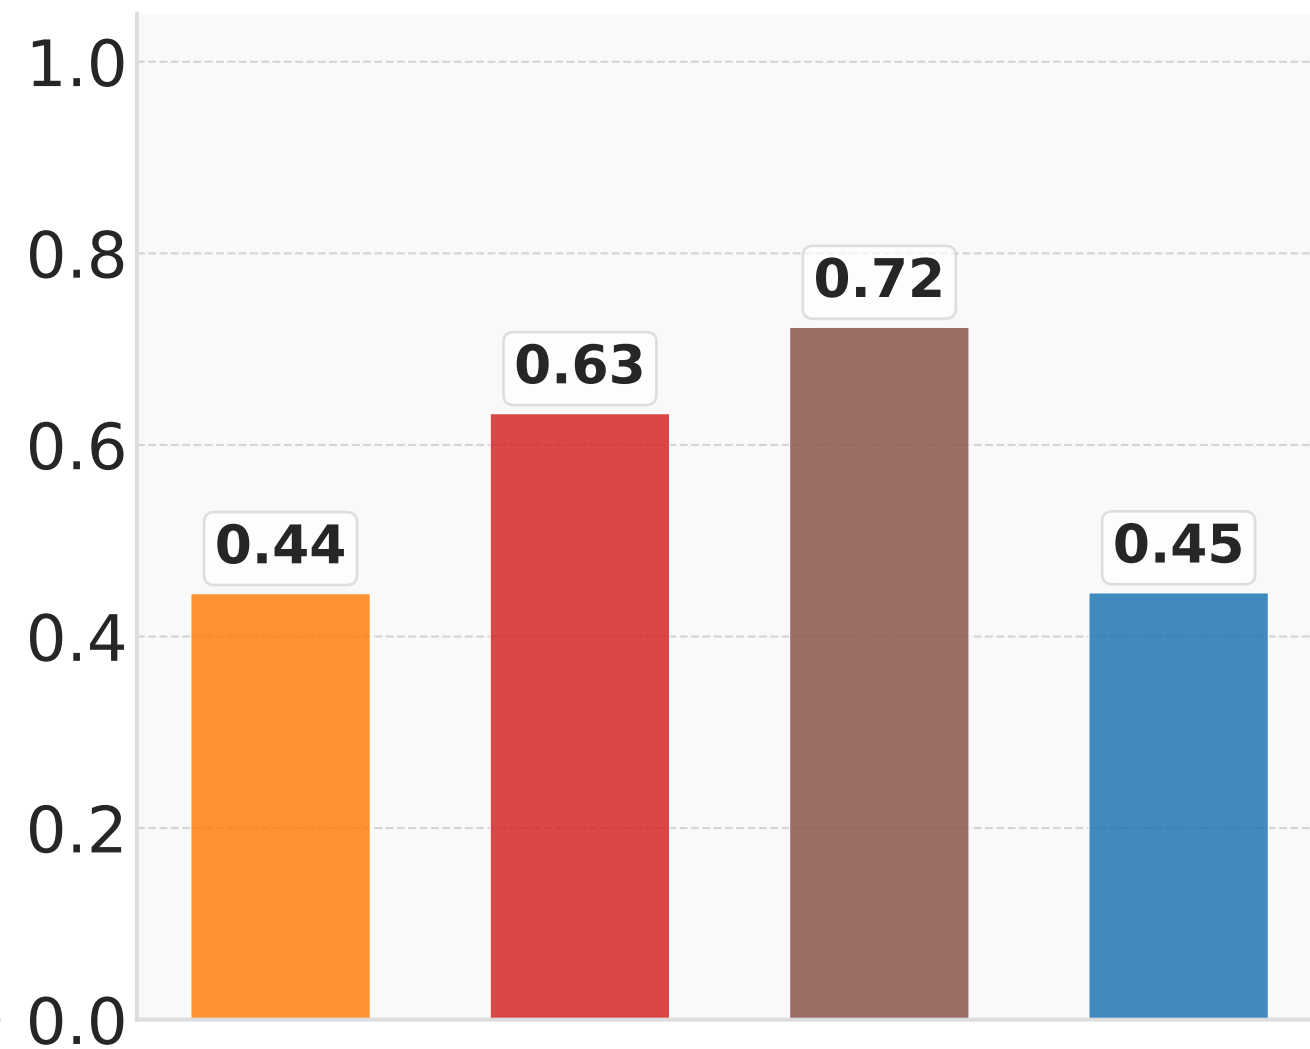**Legal**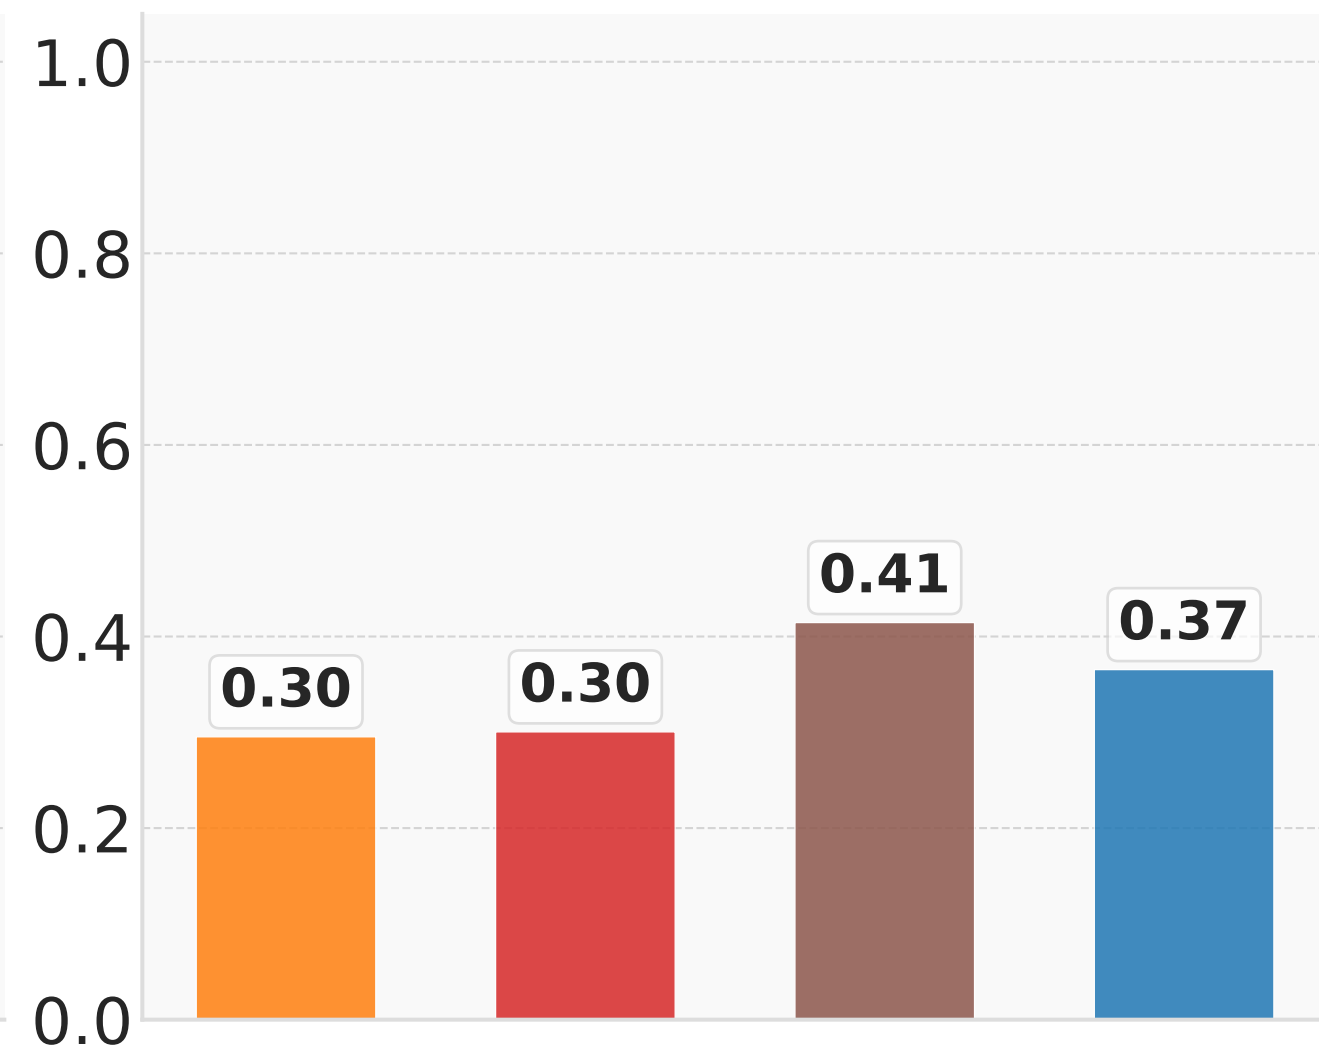

Claude-3.5-Haiku    DeepSeek-R1    Gemini-2.5-Flash    GPT-4.1

Supplement: supplementary_material [file domain_segmentation_f1_subplots.pdf › entrophy-main/figures/domain_segmentation_f1_subplots.pdf]

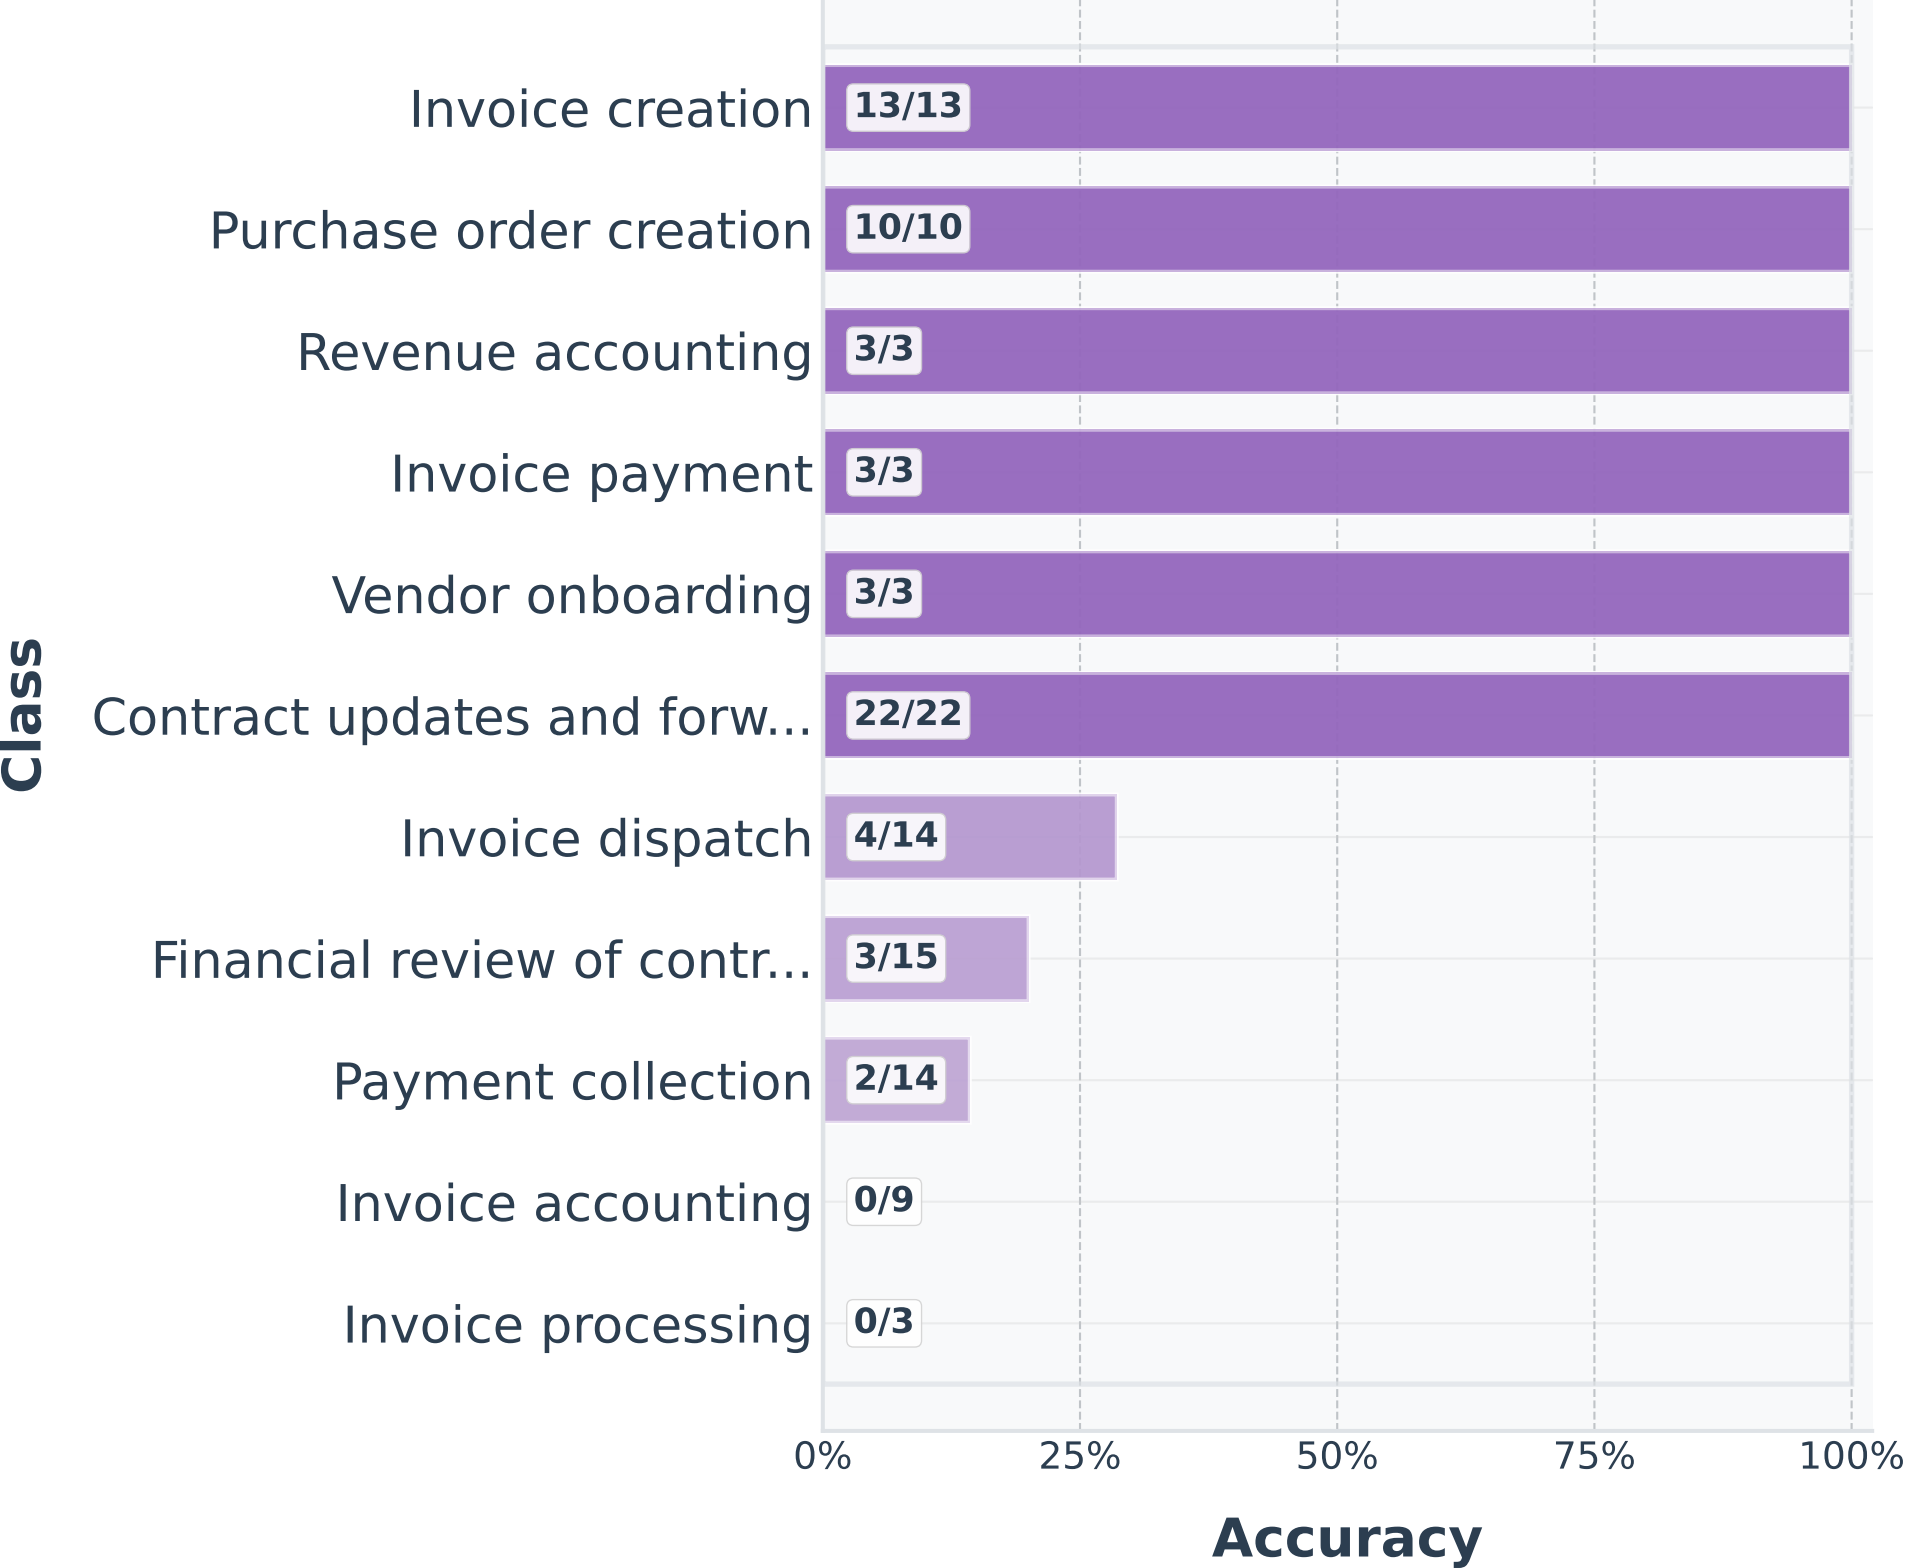

Supplement: supplementary_material [file finance_classification_Qwen3-32B_class_accuracy.pdf › entrophy-main/figures/finance_classification_Qwen3-32B_class_accuracy.pdf]

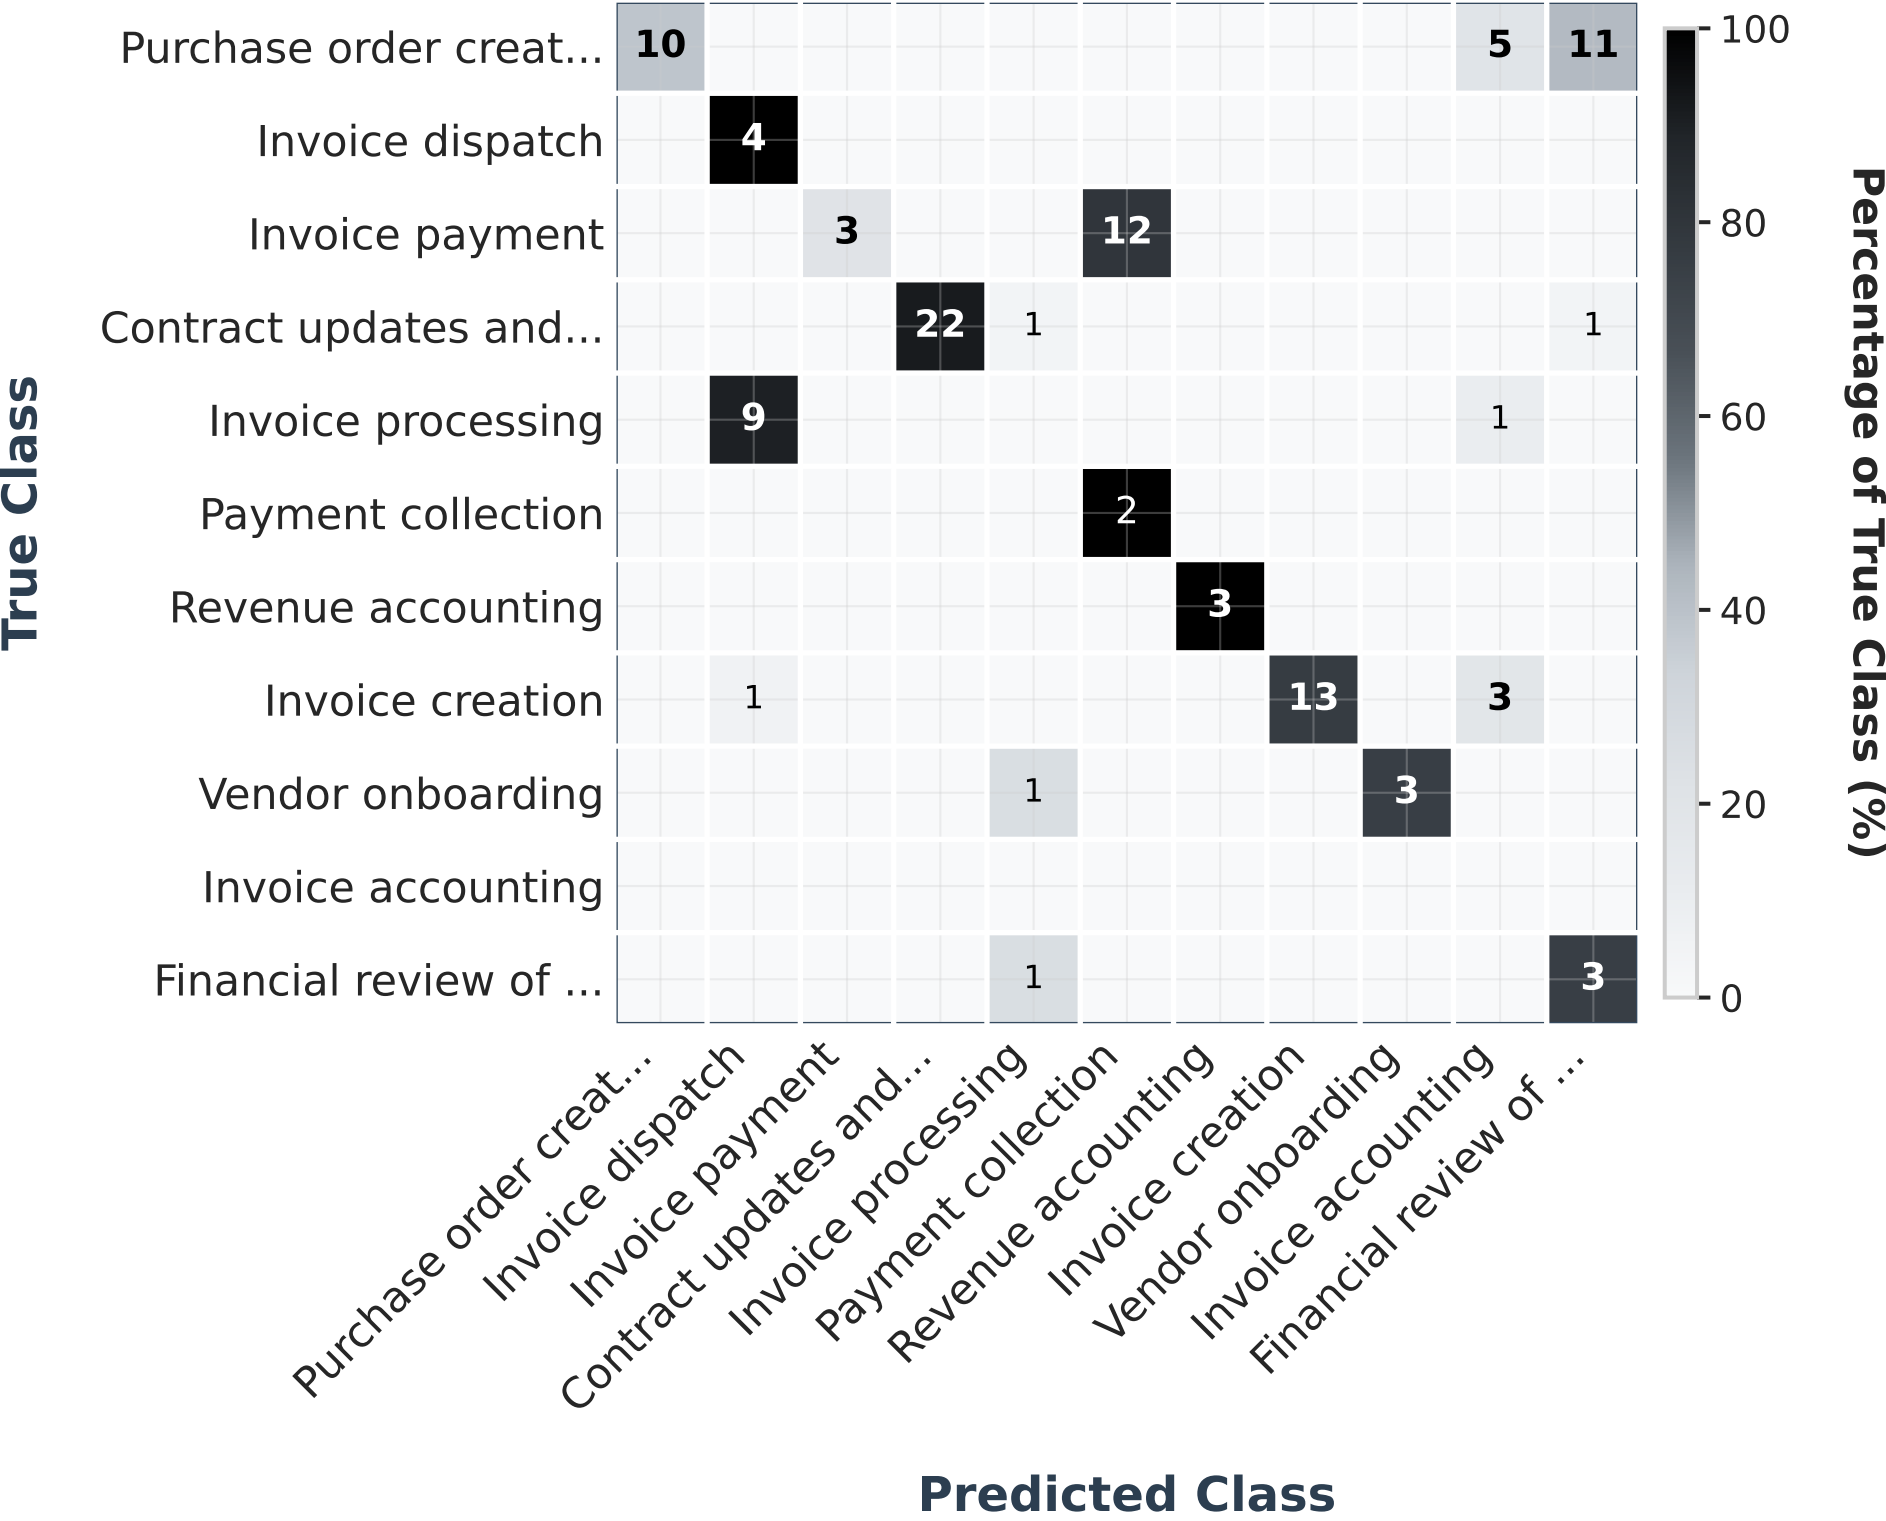

Supplement: supplementary_material [file finance_classification_Qwen3-32B_confusion.pdf › entrophy-main/figures/finance_classification_Qwen3-32B_confusion.pdf]

Class

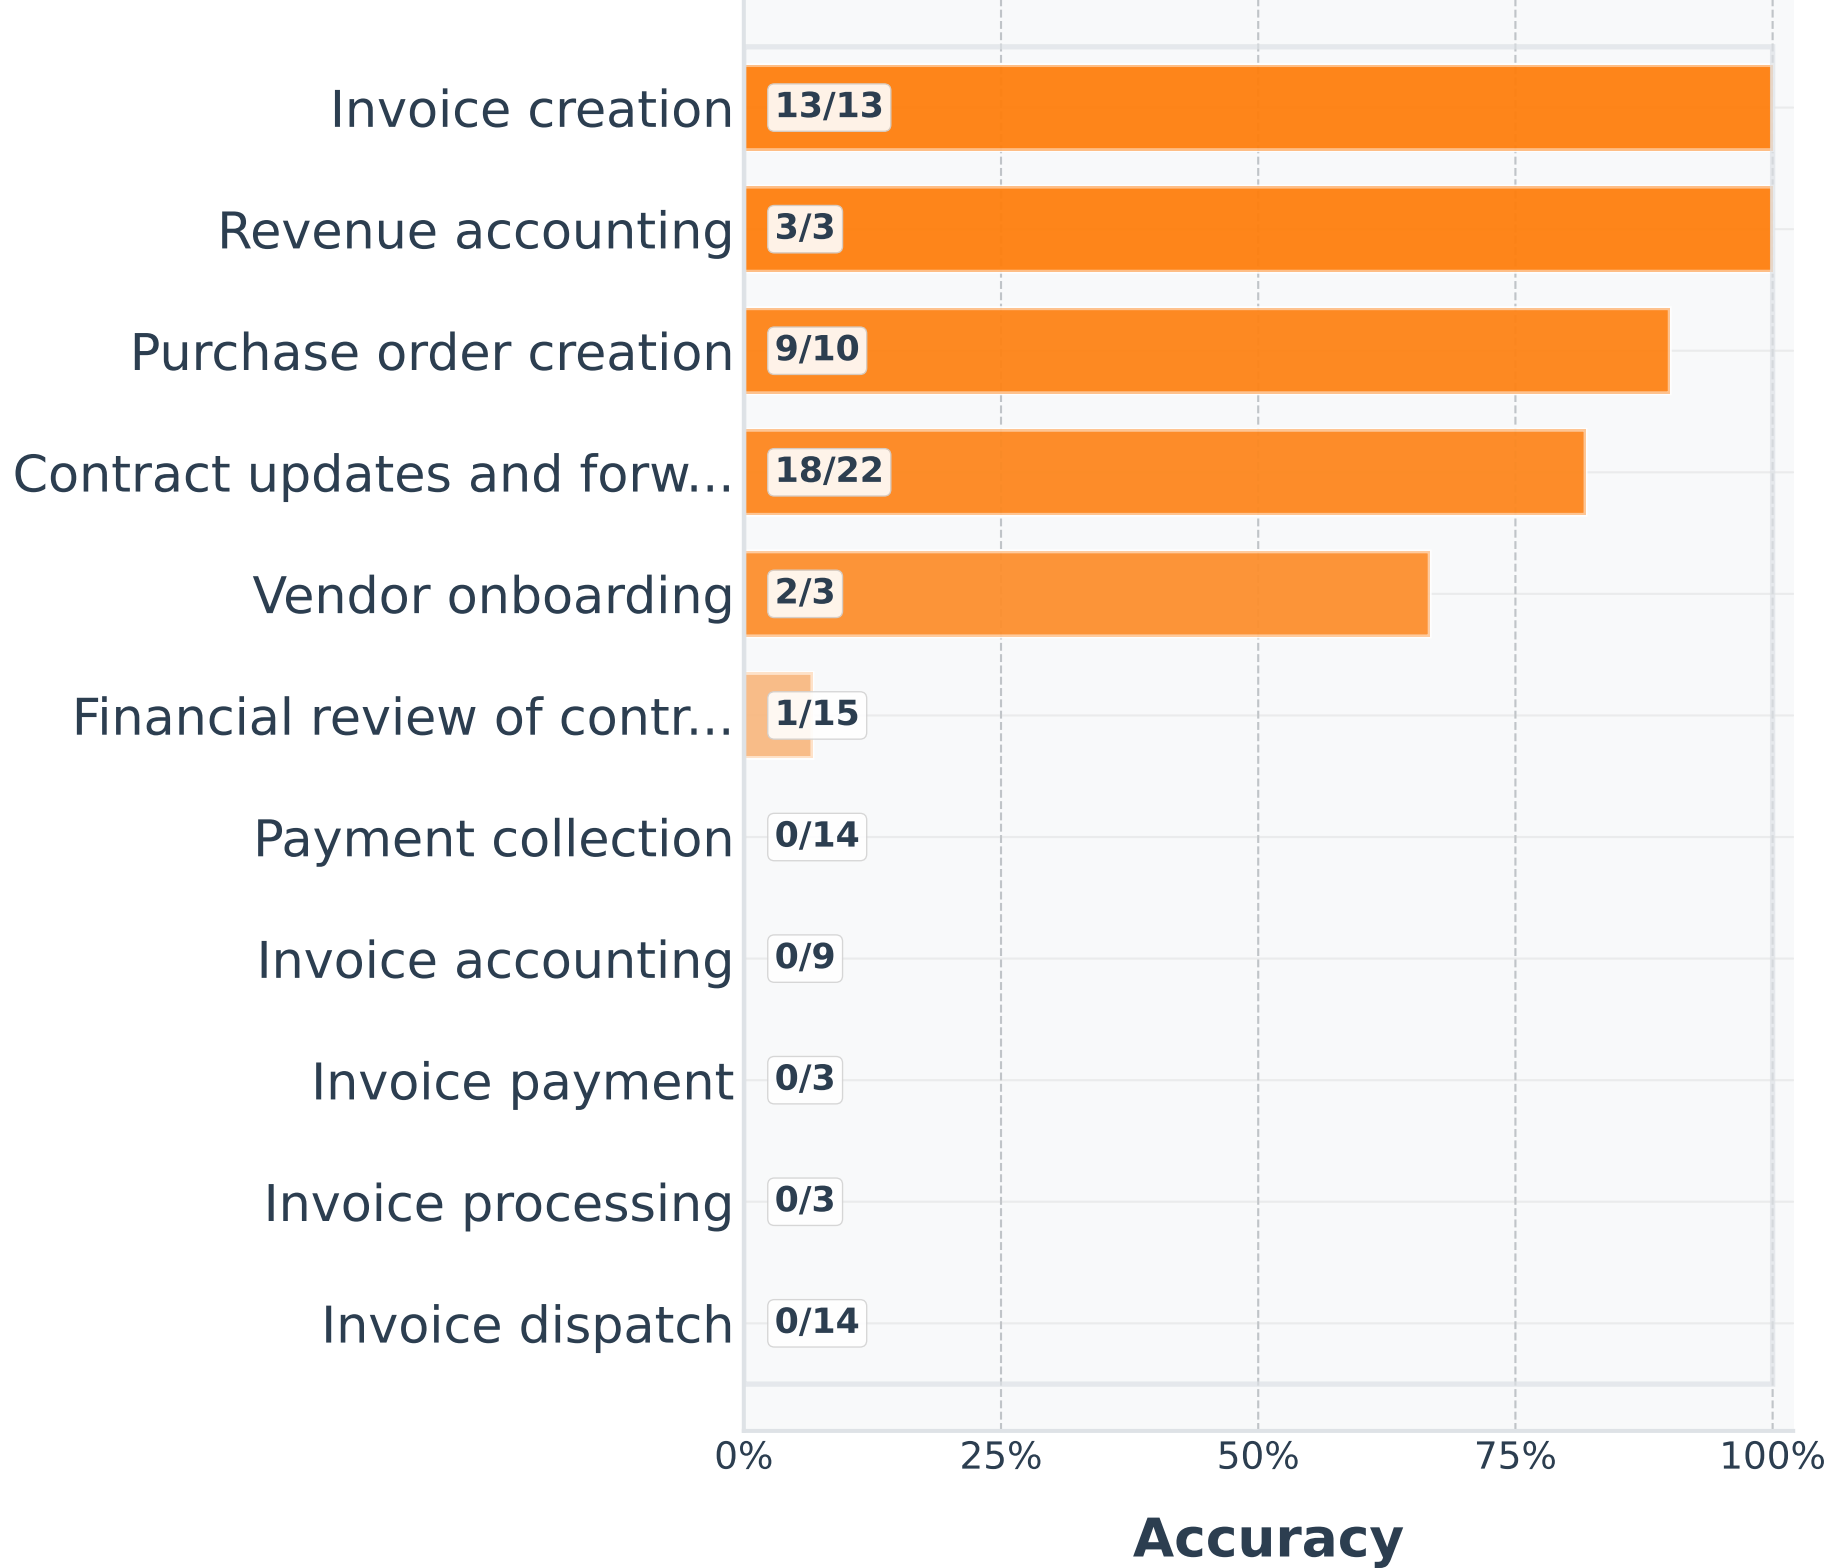

Supplement: supplementary_material [file finance_classification_claude-3.5-haiku_class_accuracy.pdf › entrophy-main/figures/finance_classification_claude-3.5-haiku_class_accuracy.pdf]

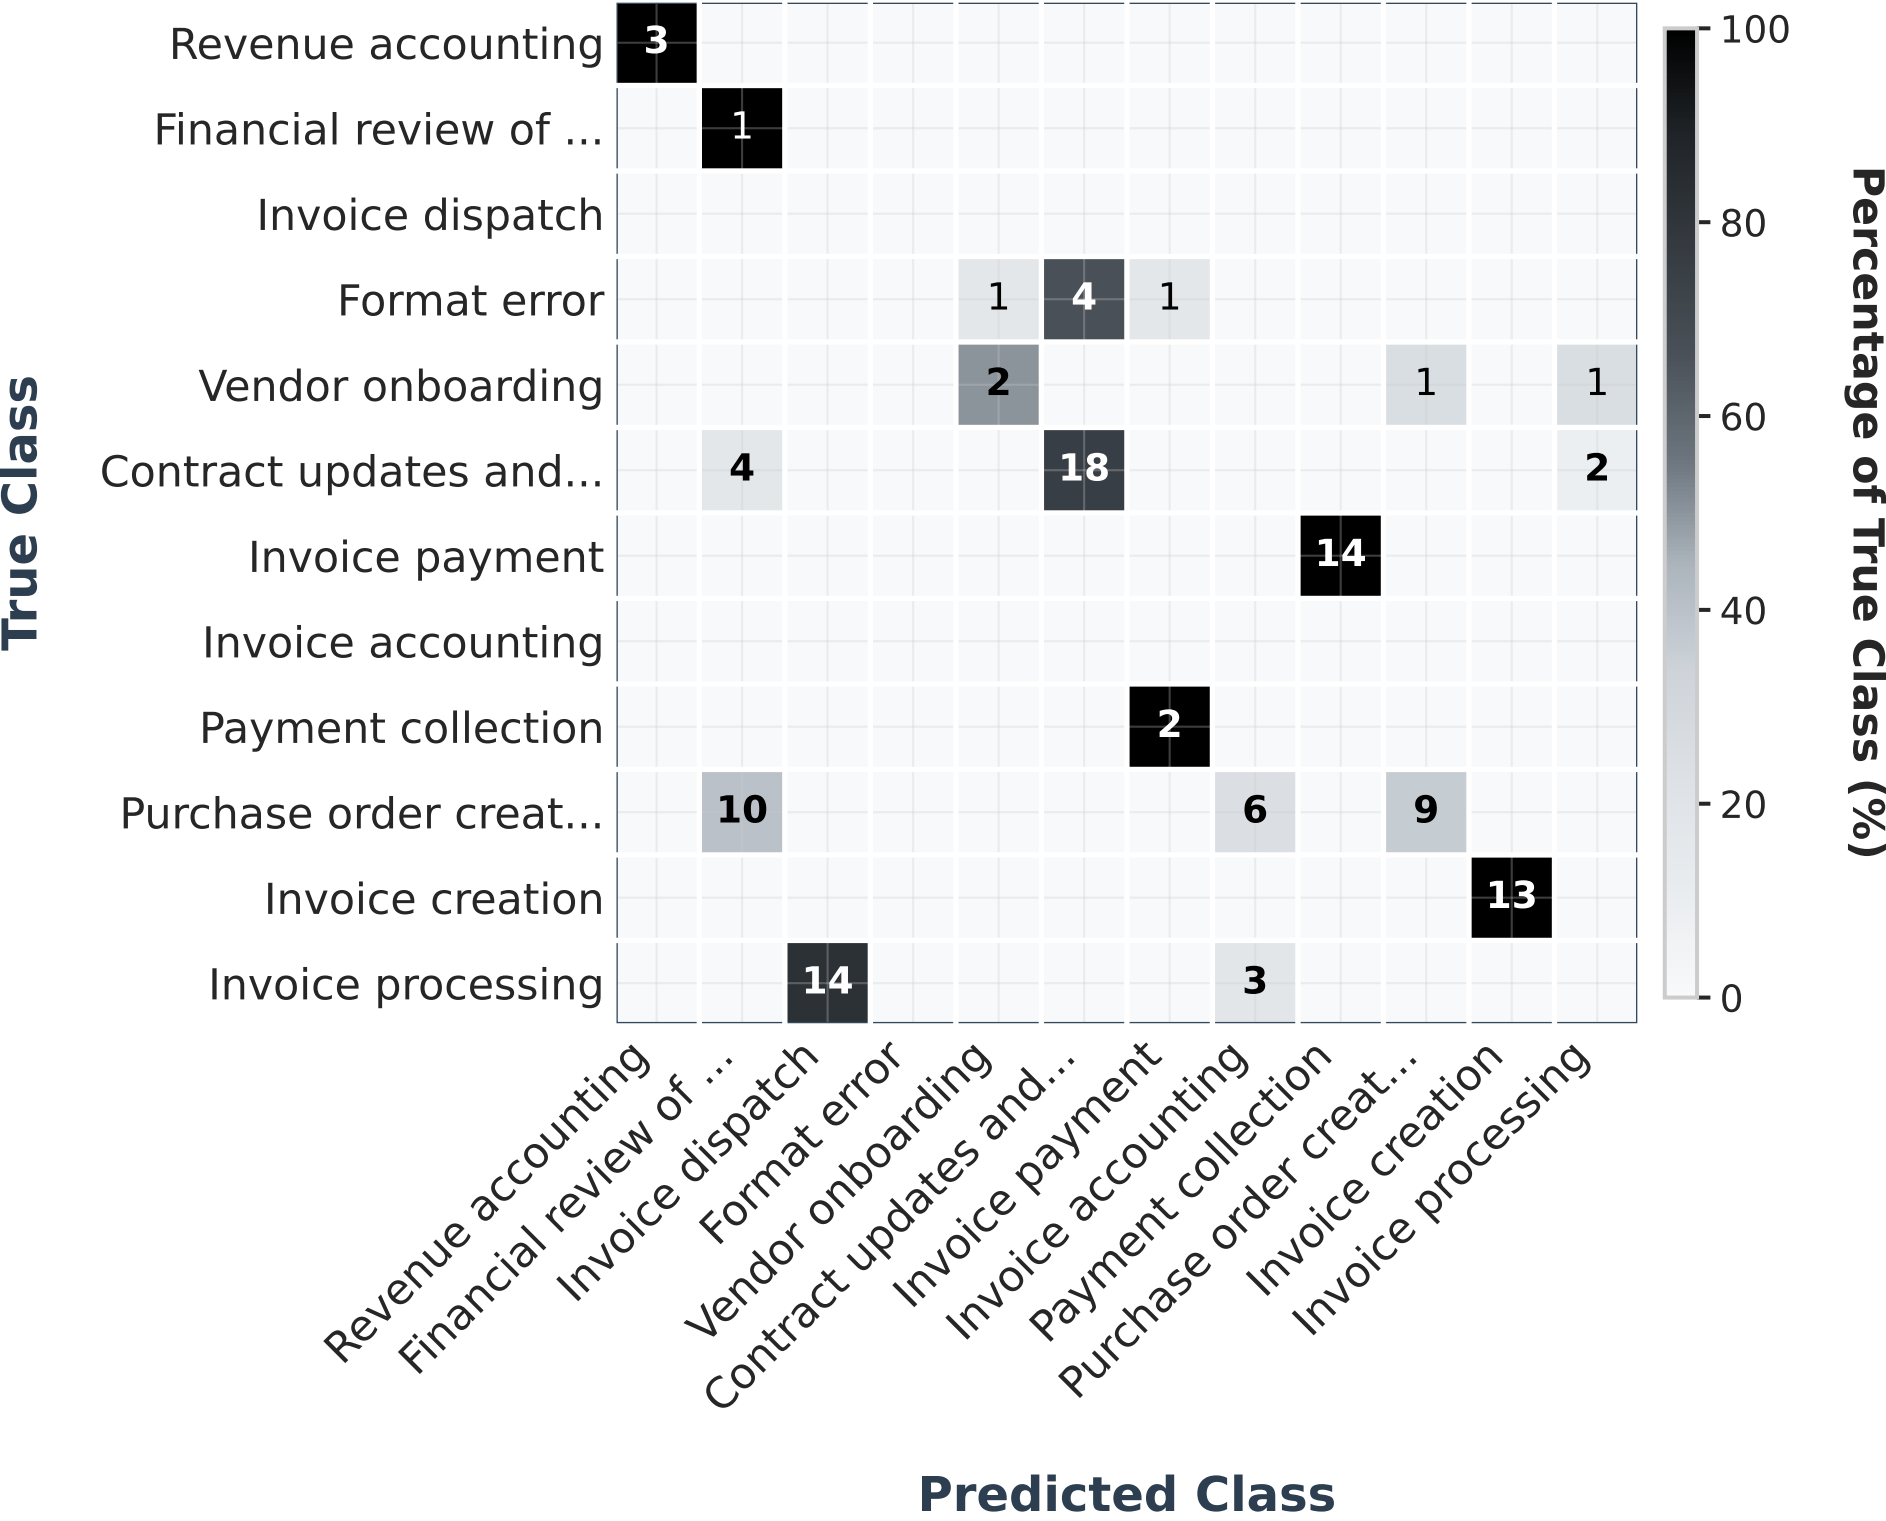

Supplement: supplementary_material [file finance_classification_claude-3.5-haiku_confusion.pdf › entrophy-main/figures/finance_classification_claude-3.5-haiku_confusion.pdf]

Class

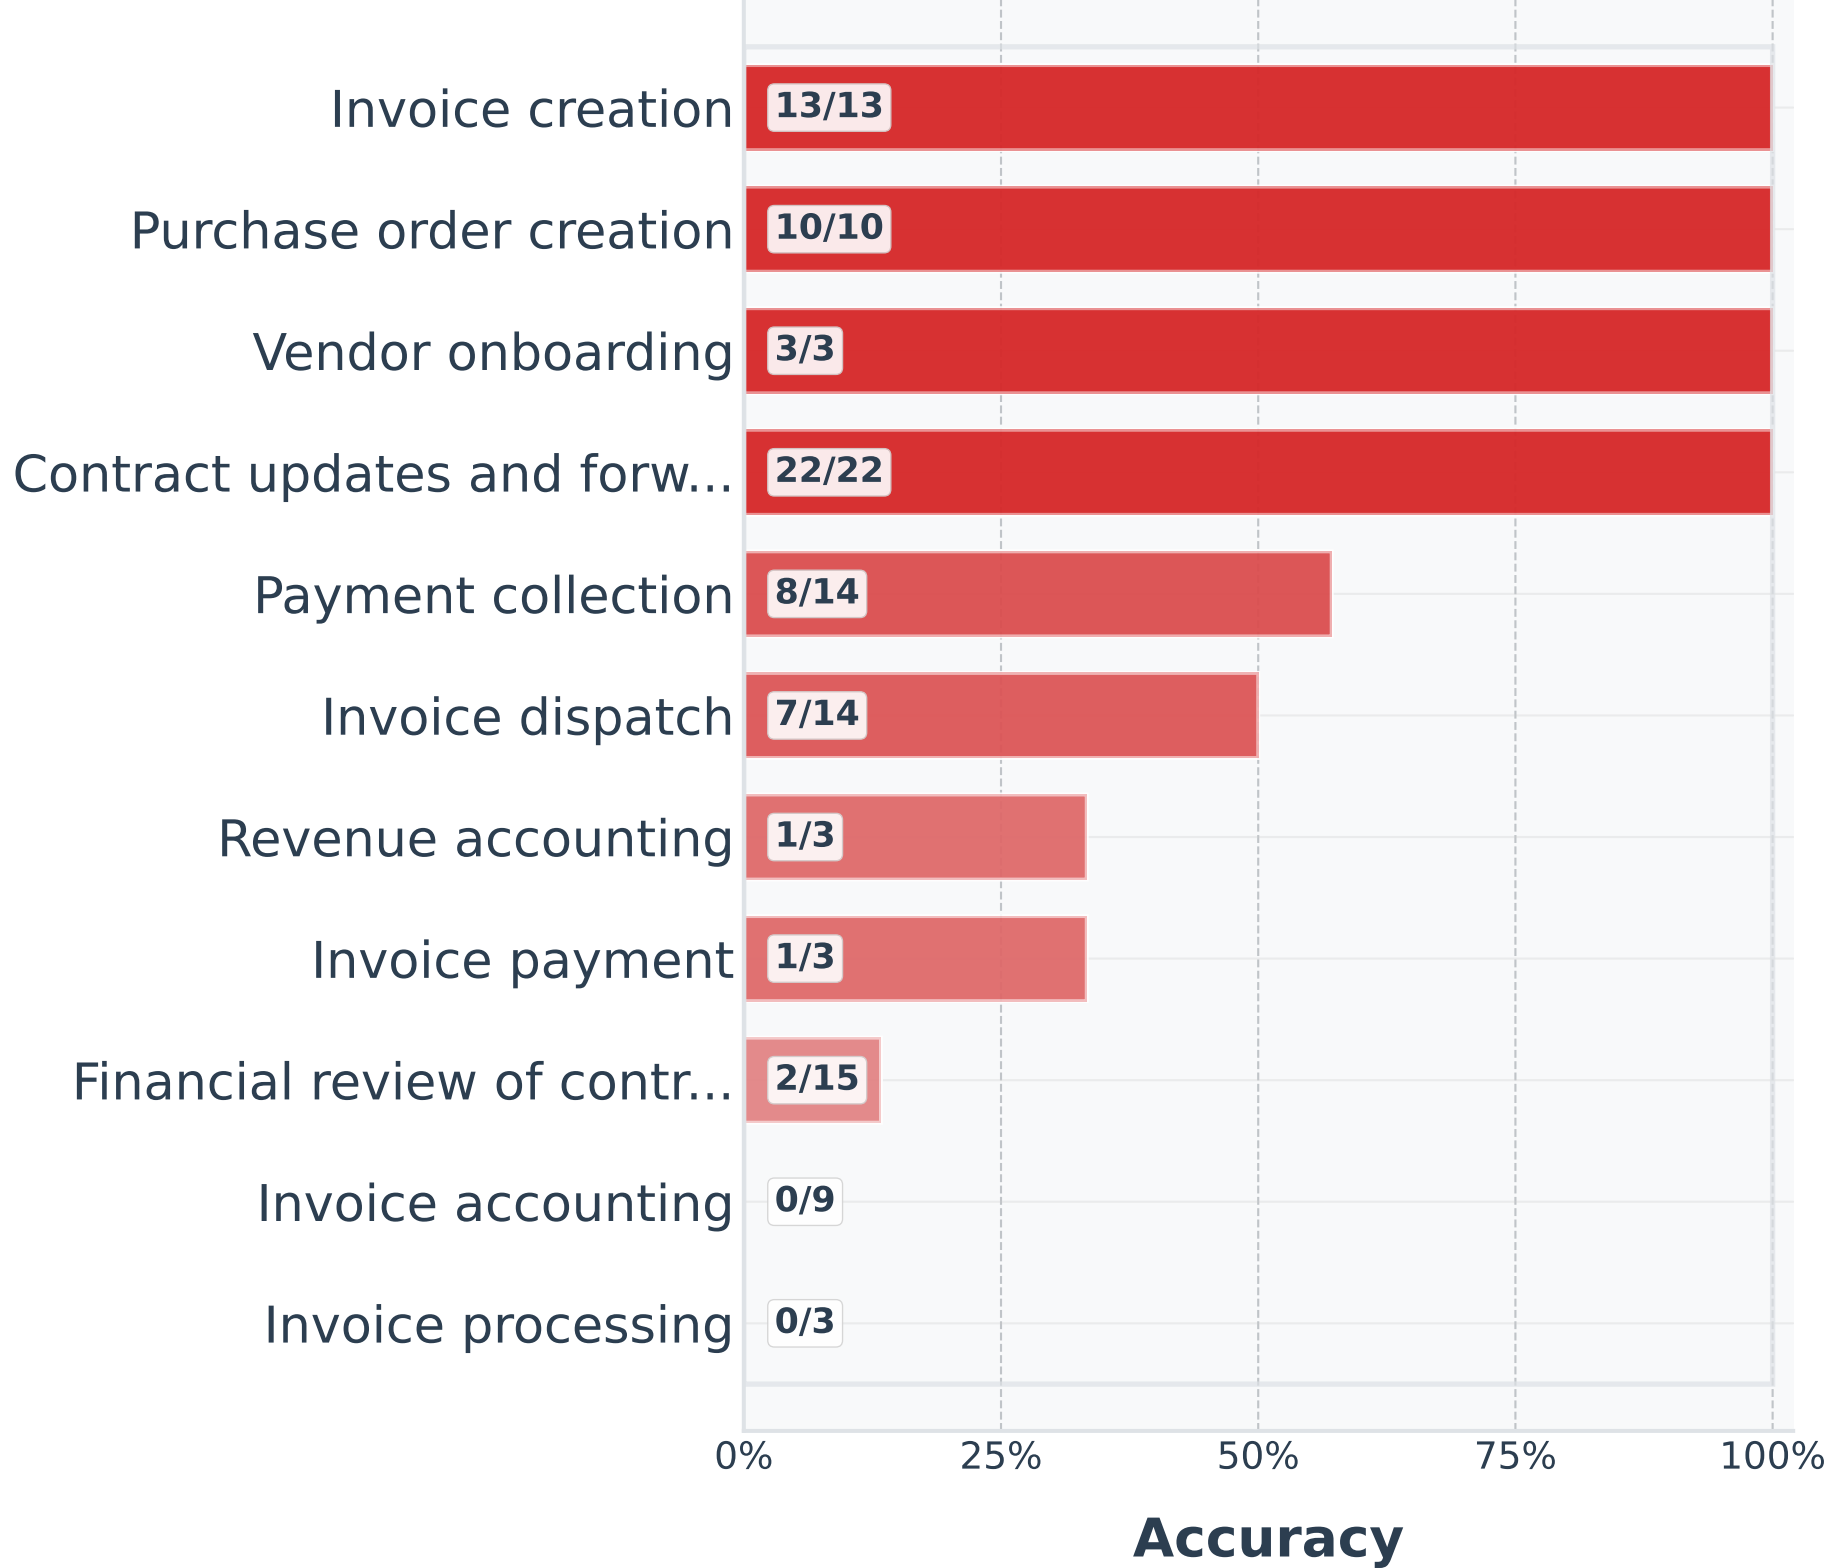

Supplement: supplementary_material [file finance_classification_deepseek-r1_class_accuracy.pdf › entrophy-main/figures/finance_classification_deepseek-r1_class_accuracy.pdf]

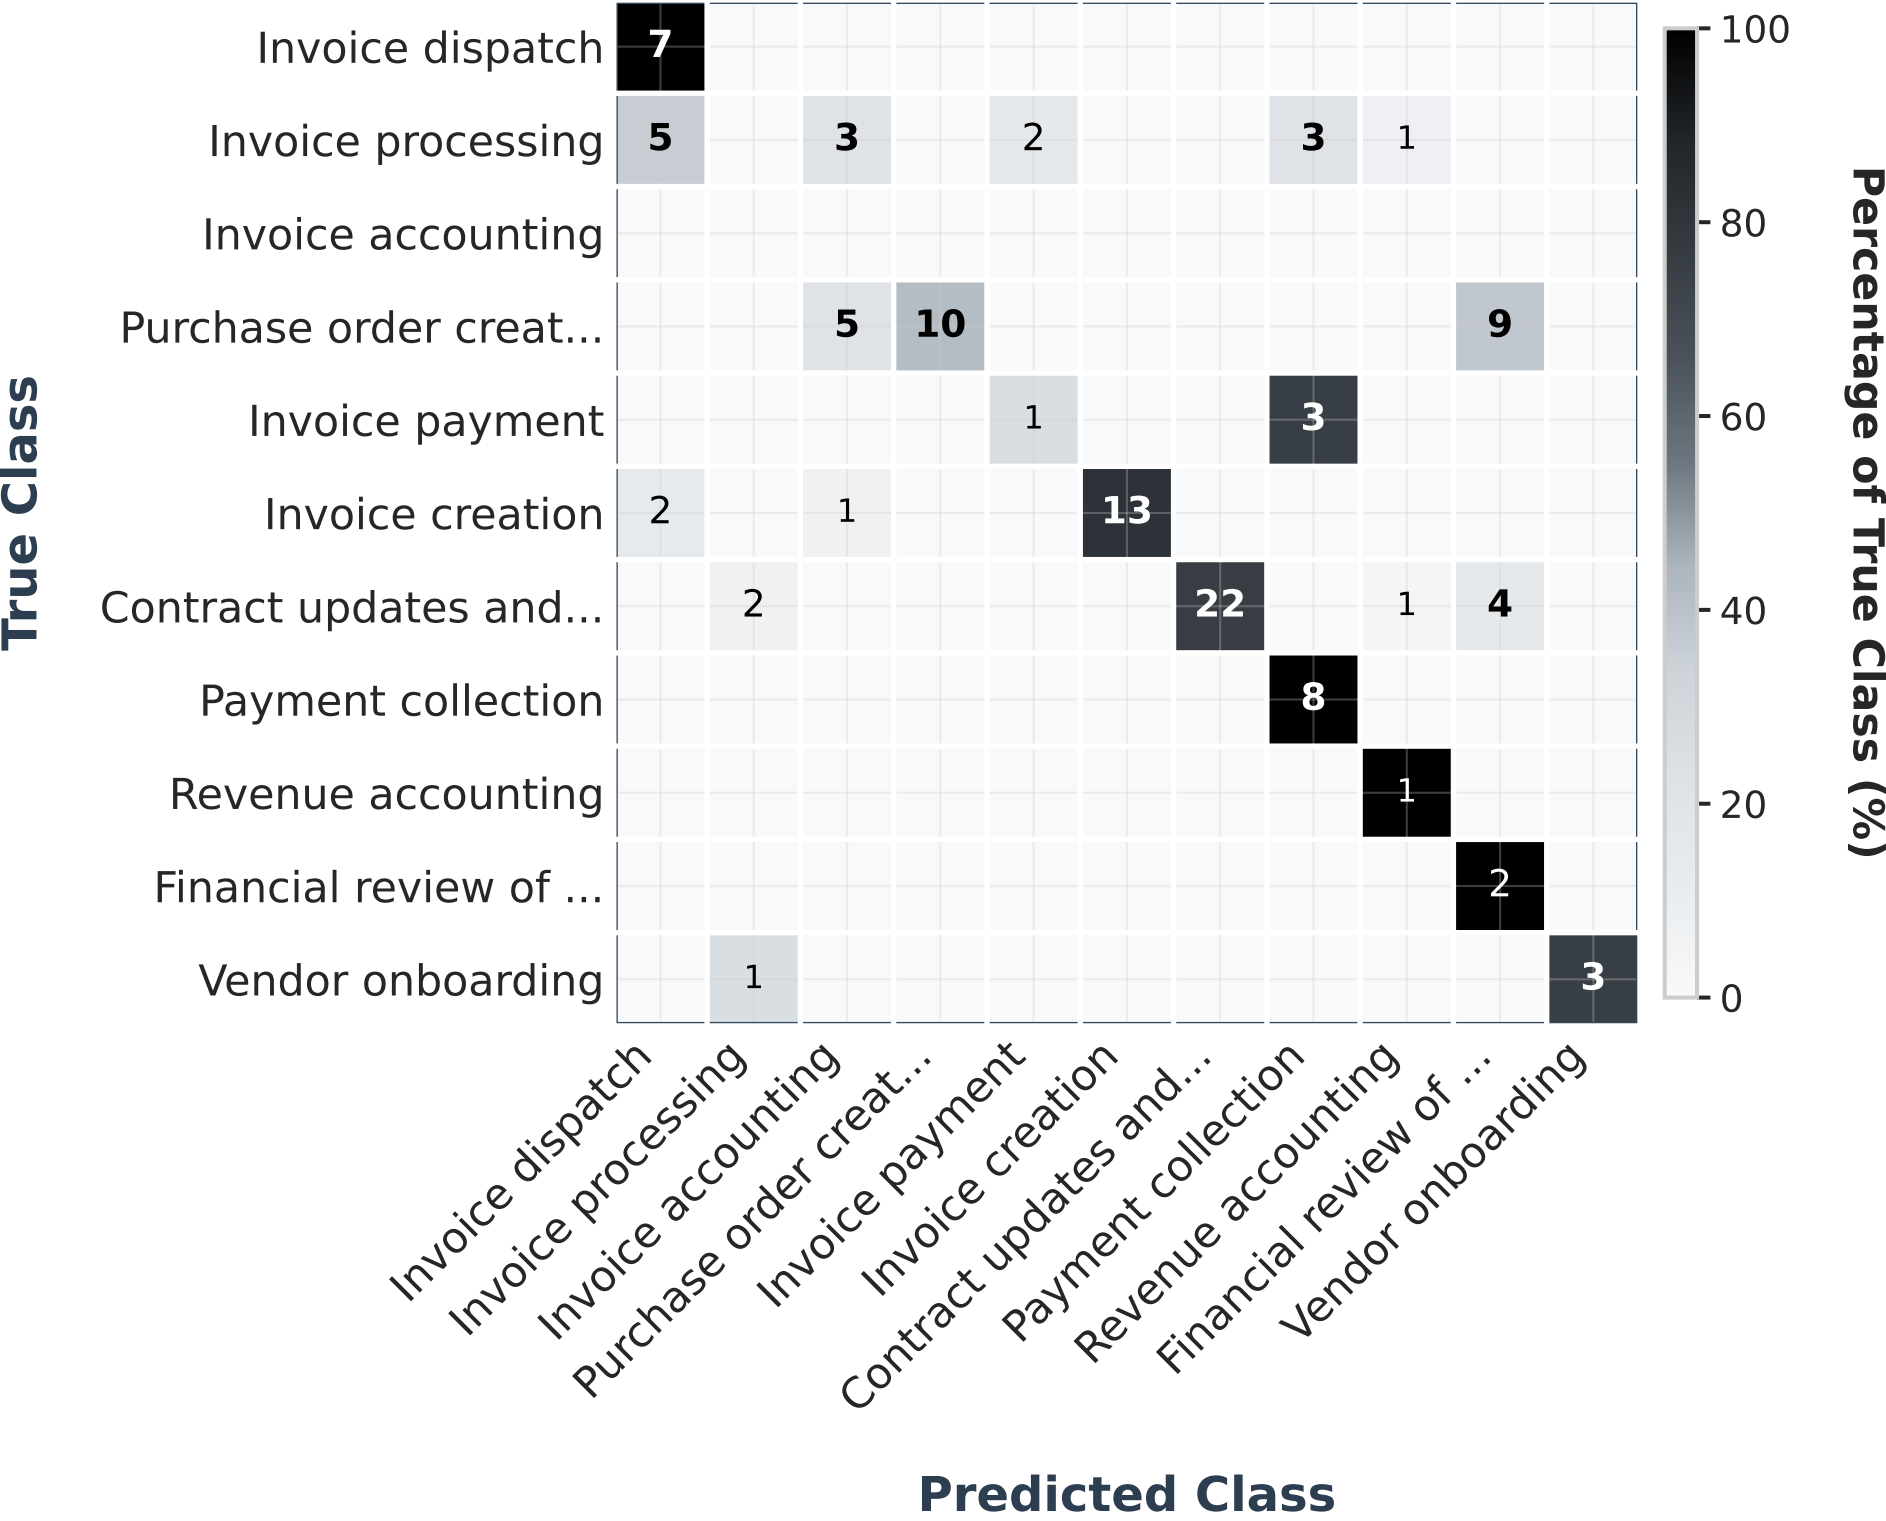

Supplement: supplementary_material [file finance_classification_deepseek-r1_confusion.pdf › entrophy-main/figures/finance_classification_deepseek-r1_confusion.pdf]

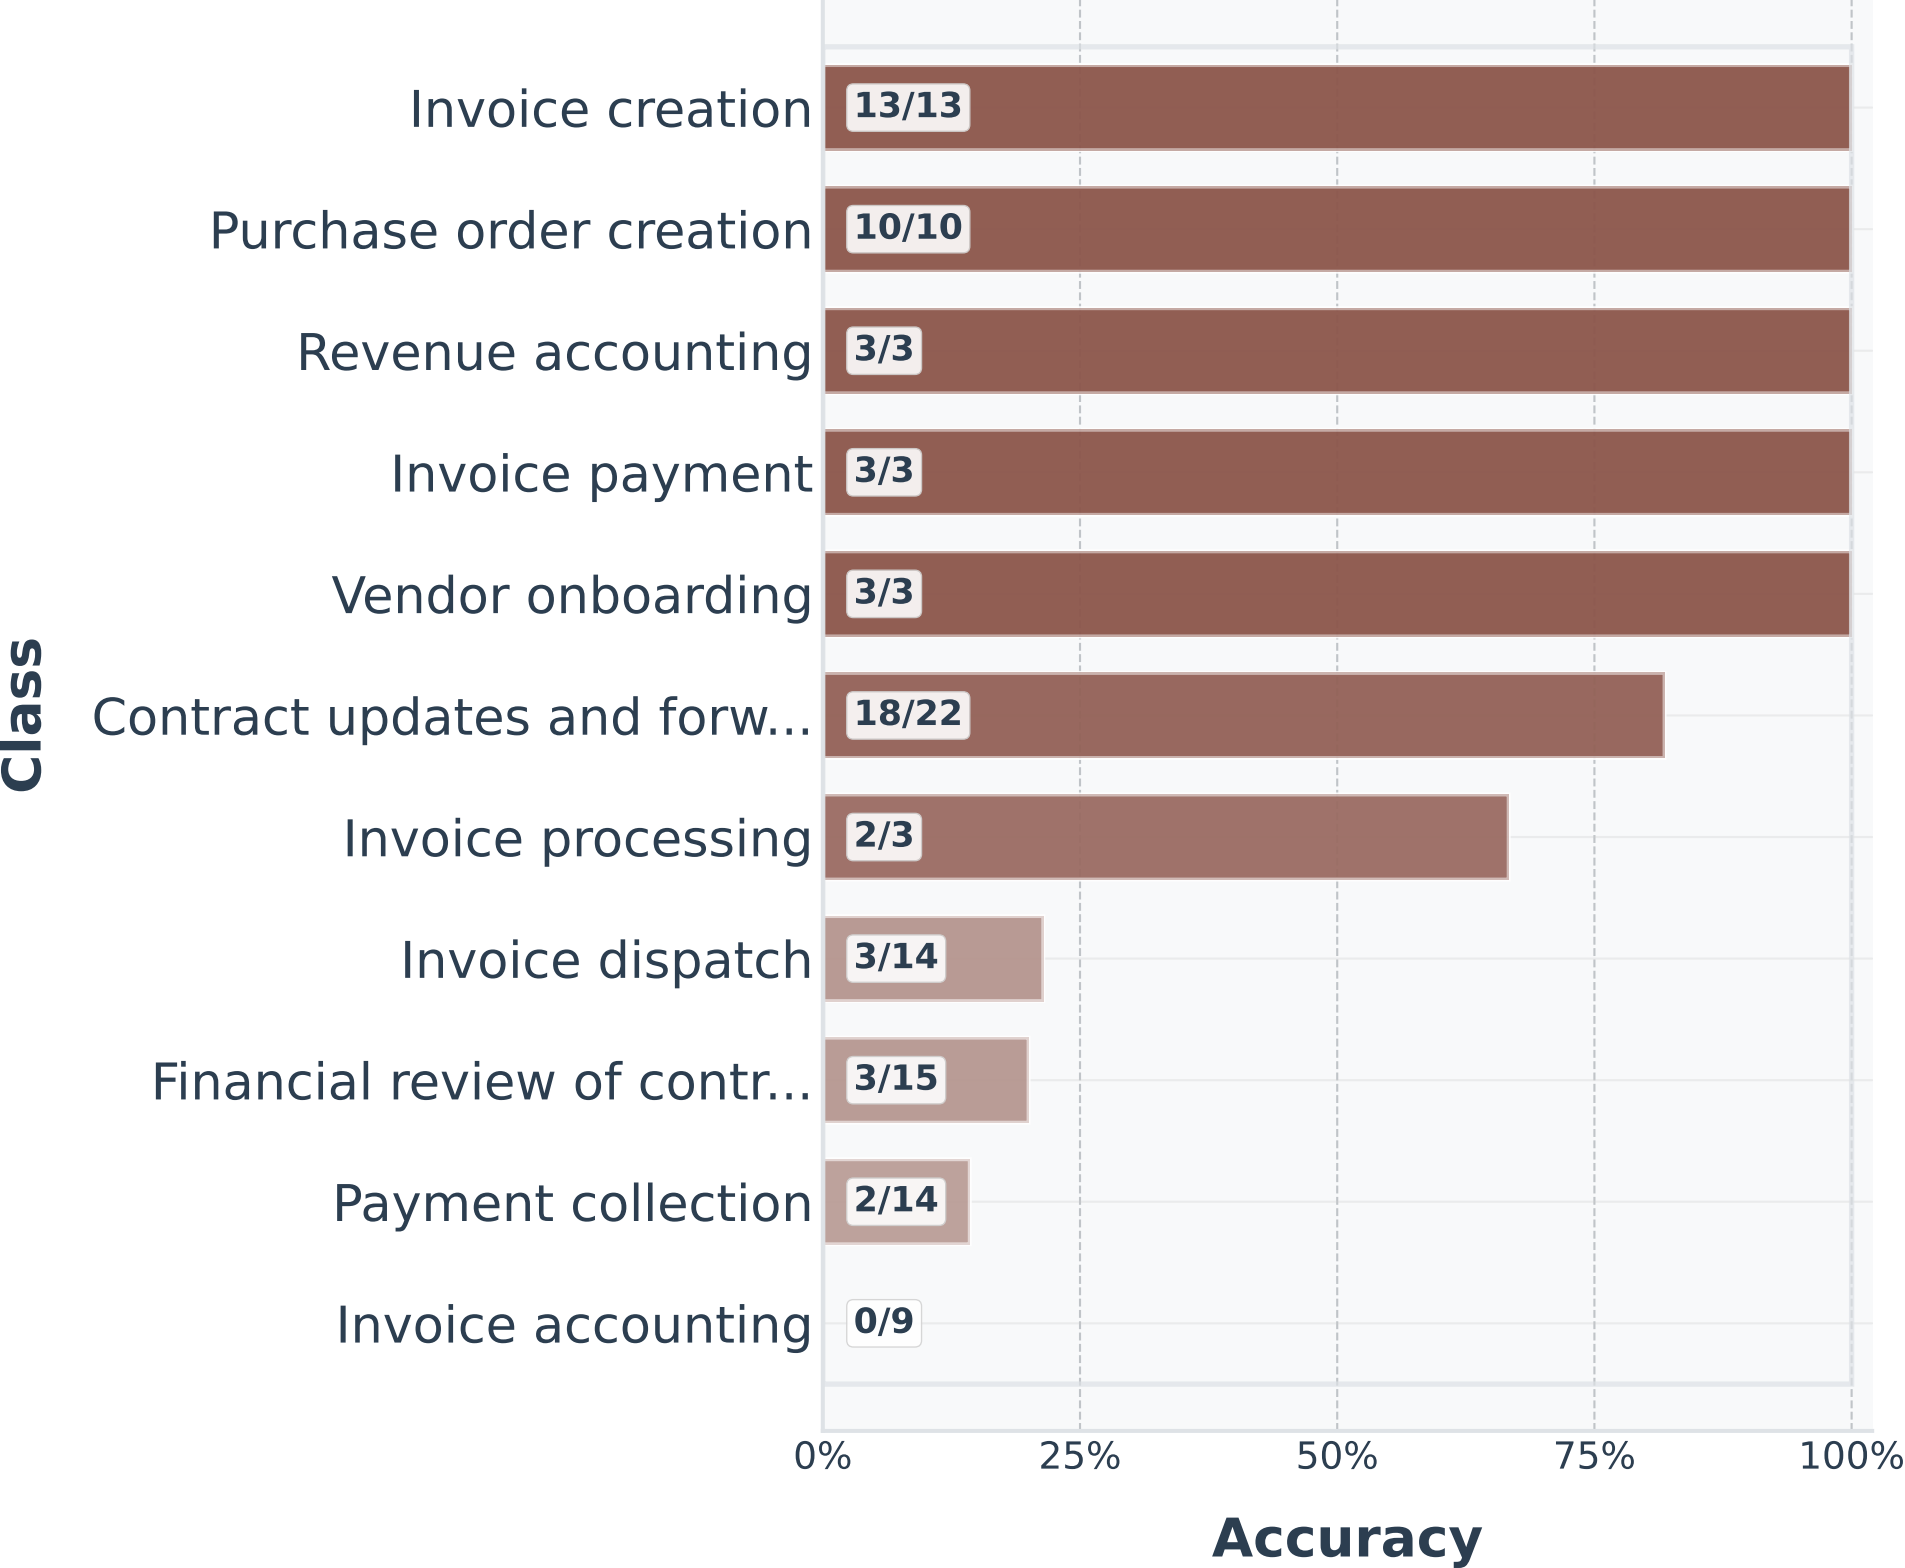

Supplement: supplementary_material [file finance_classification_gemini-2.5-flash_class_accuracy.pdf › entrophy-main/figures/finance_classification_gemini-2.5-flash_class_accuracy.pdf]

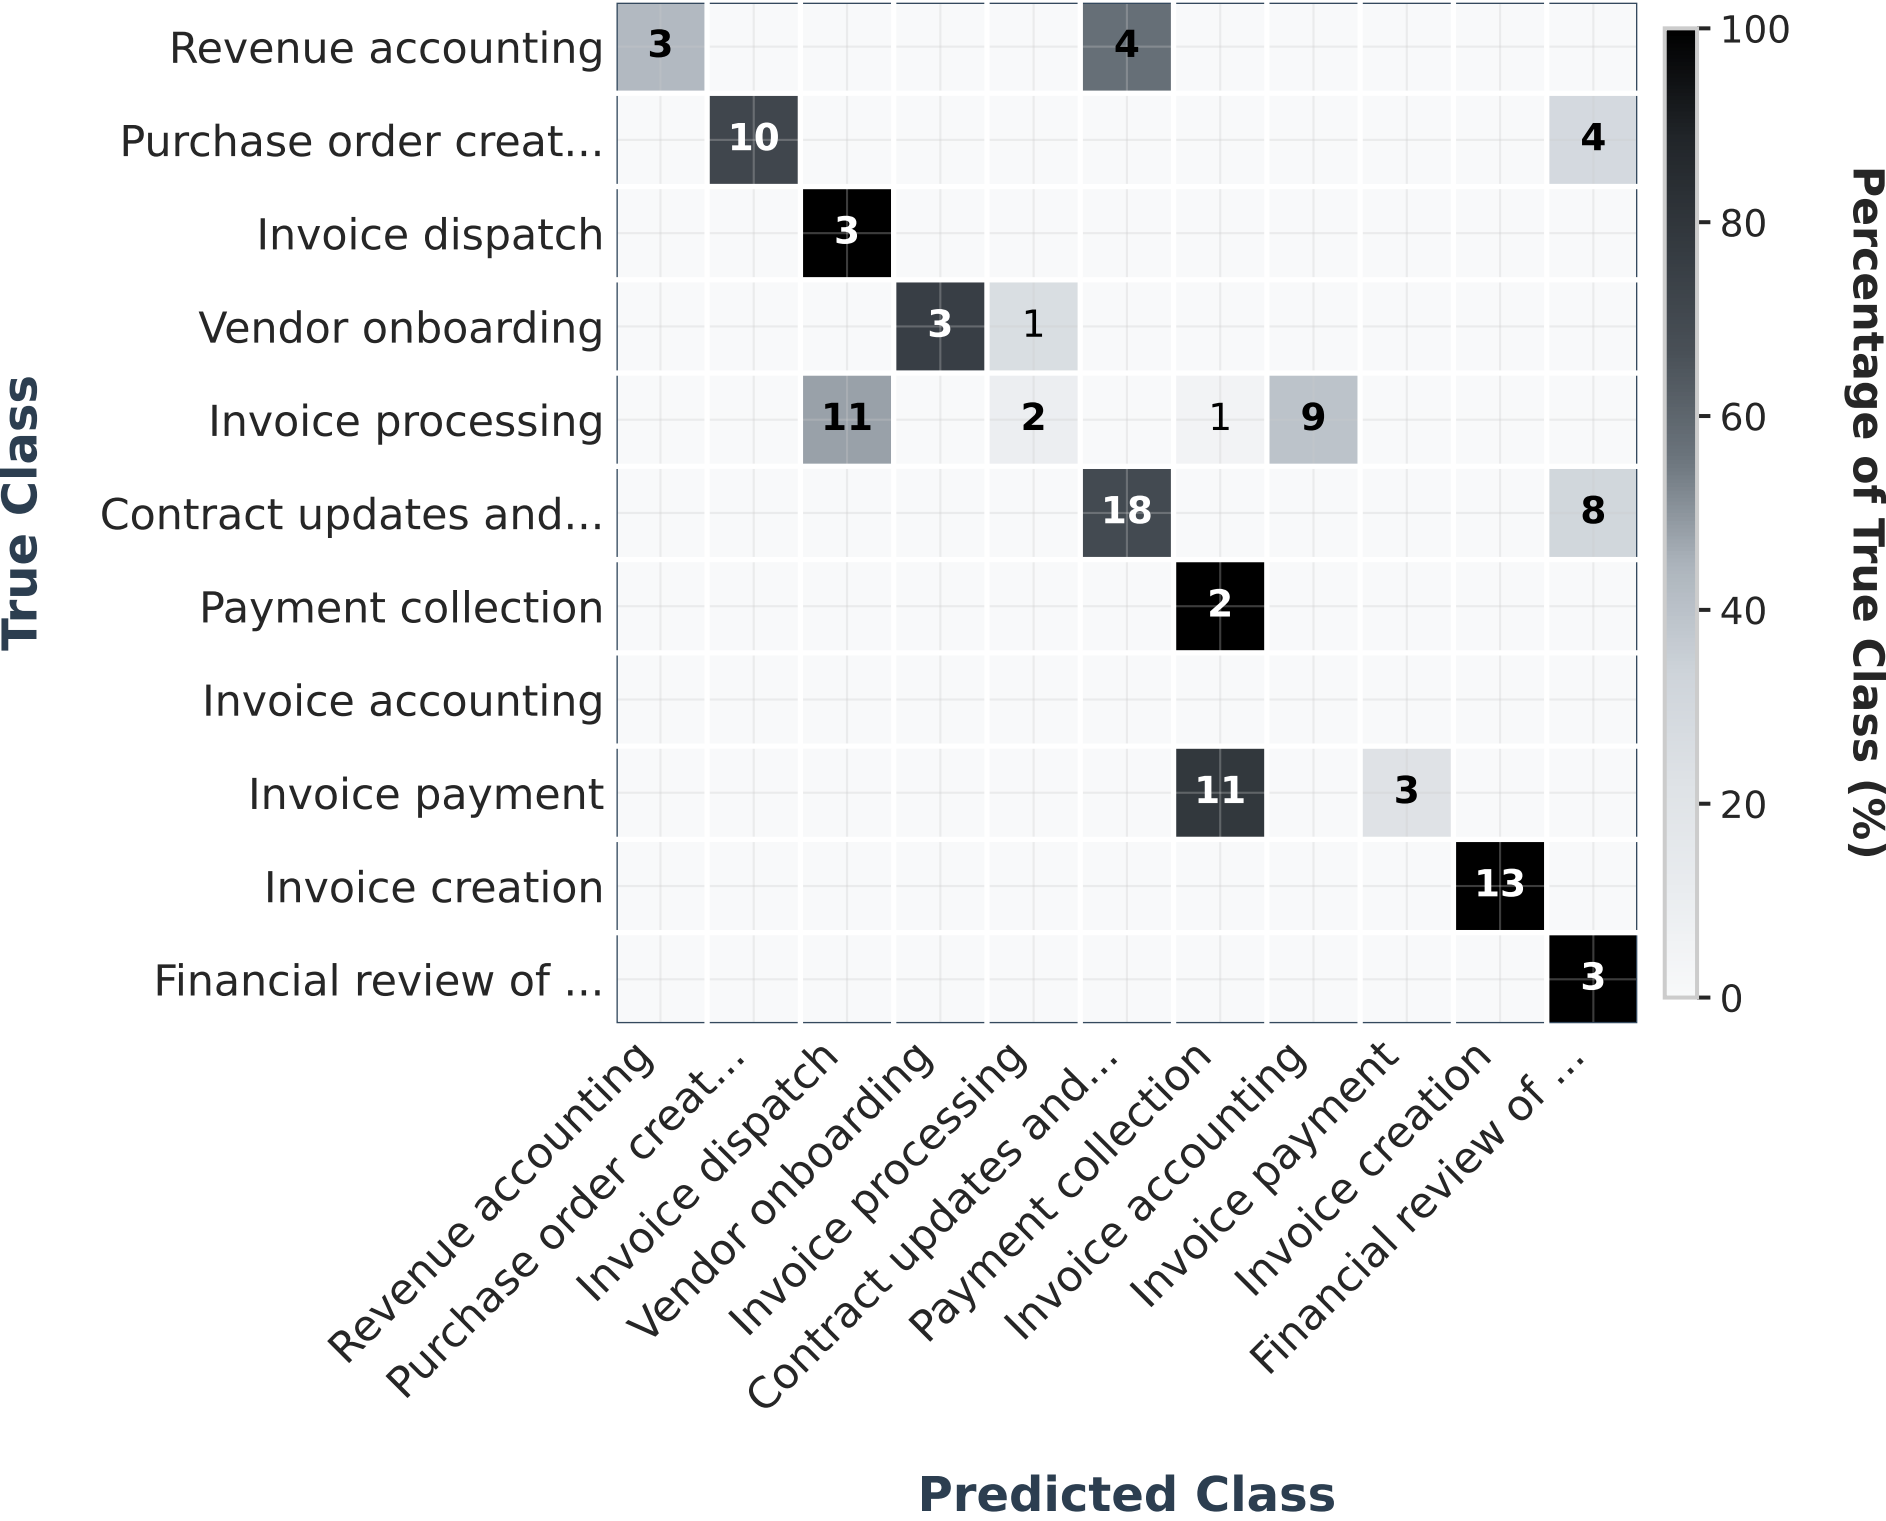

Supplement: supplementary_material [file finance_classification_gemini-2.5-flash_confusion.pdf › entrophy-main/figures/finance_classification_gemini-2.5-flash_confusion.pdf]

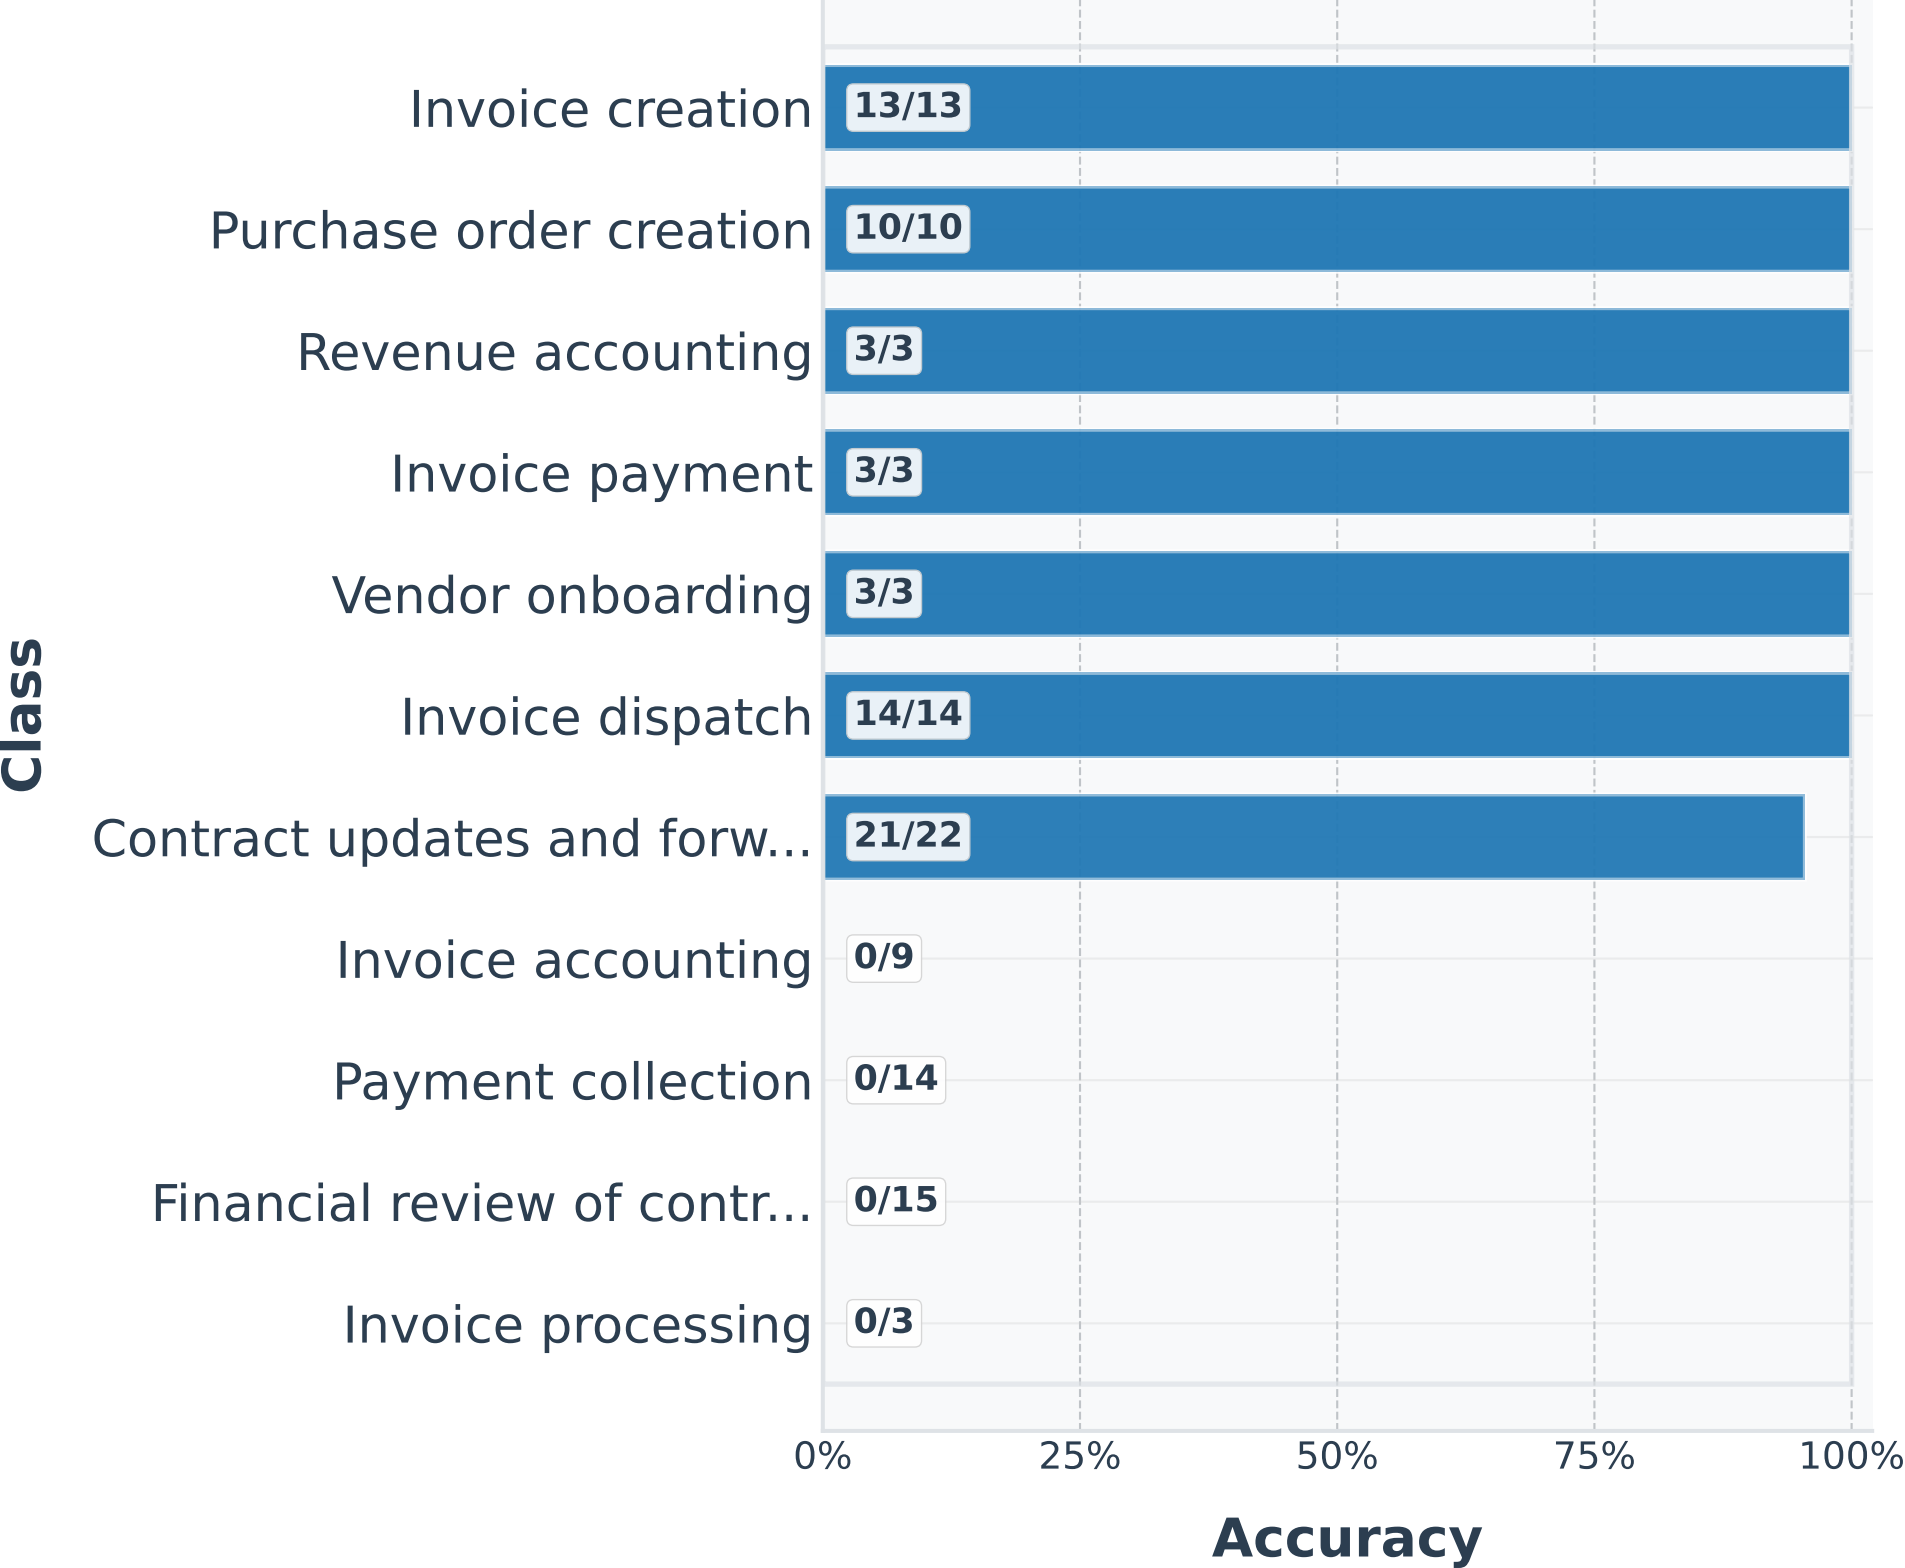

Supplement: supplementary_material [file finance_classification_gpt-4.1_class_accuracy.pdf › entrophy-main/figures/finance_classification_gpt-4.1_class_accuracy.pdf]

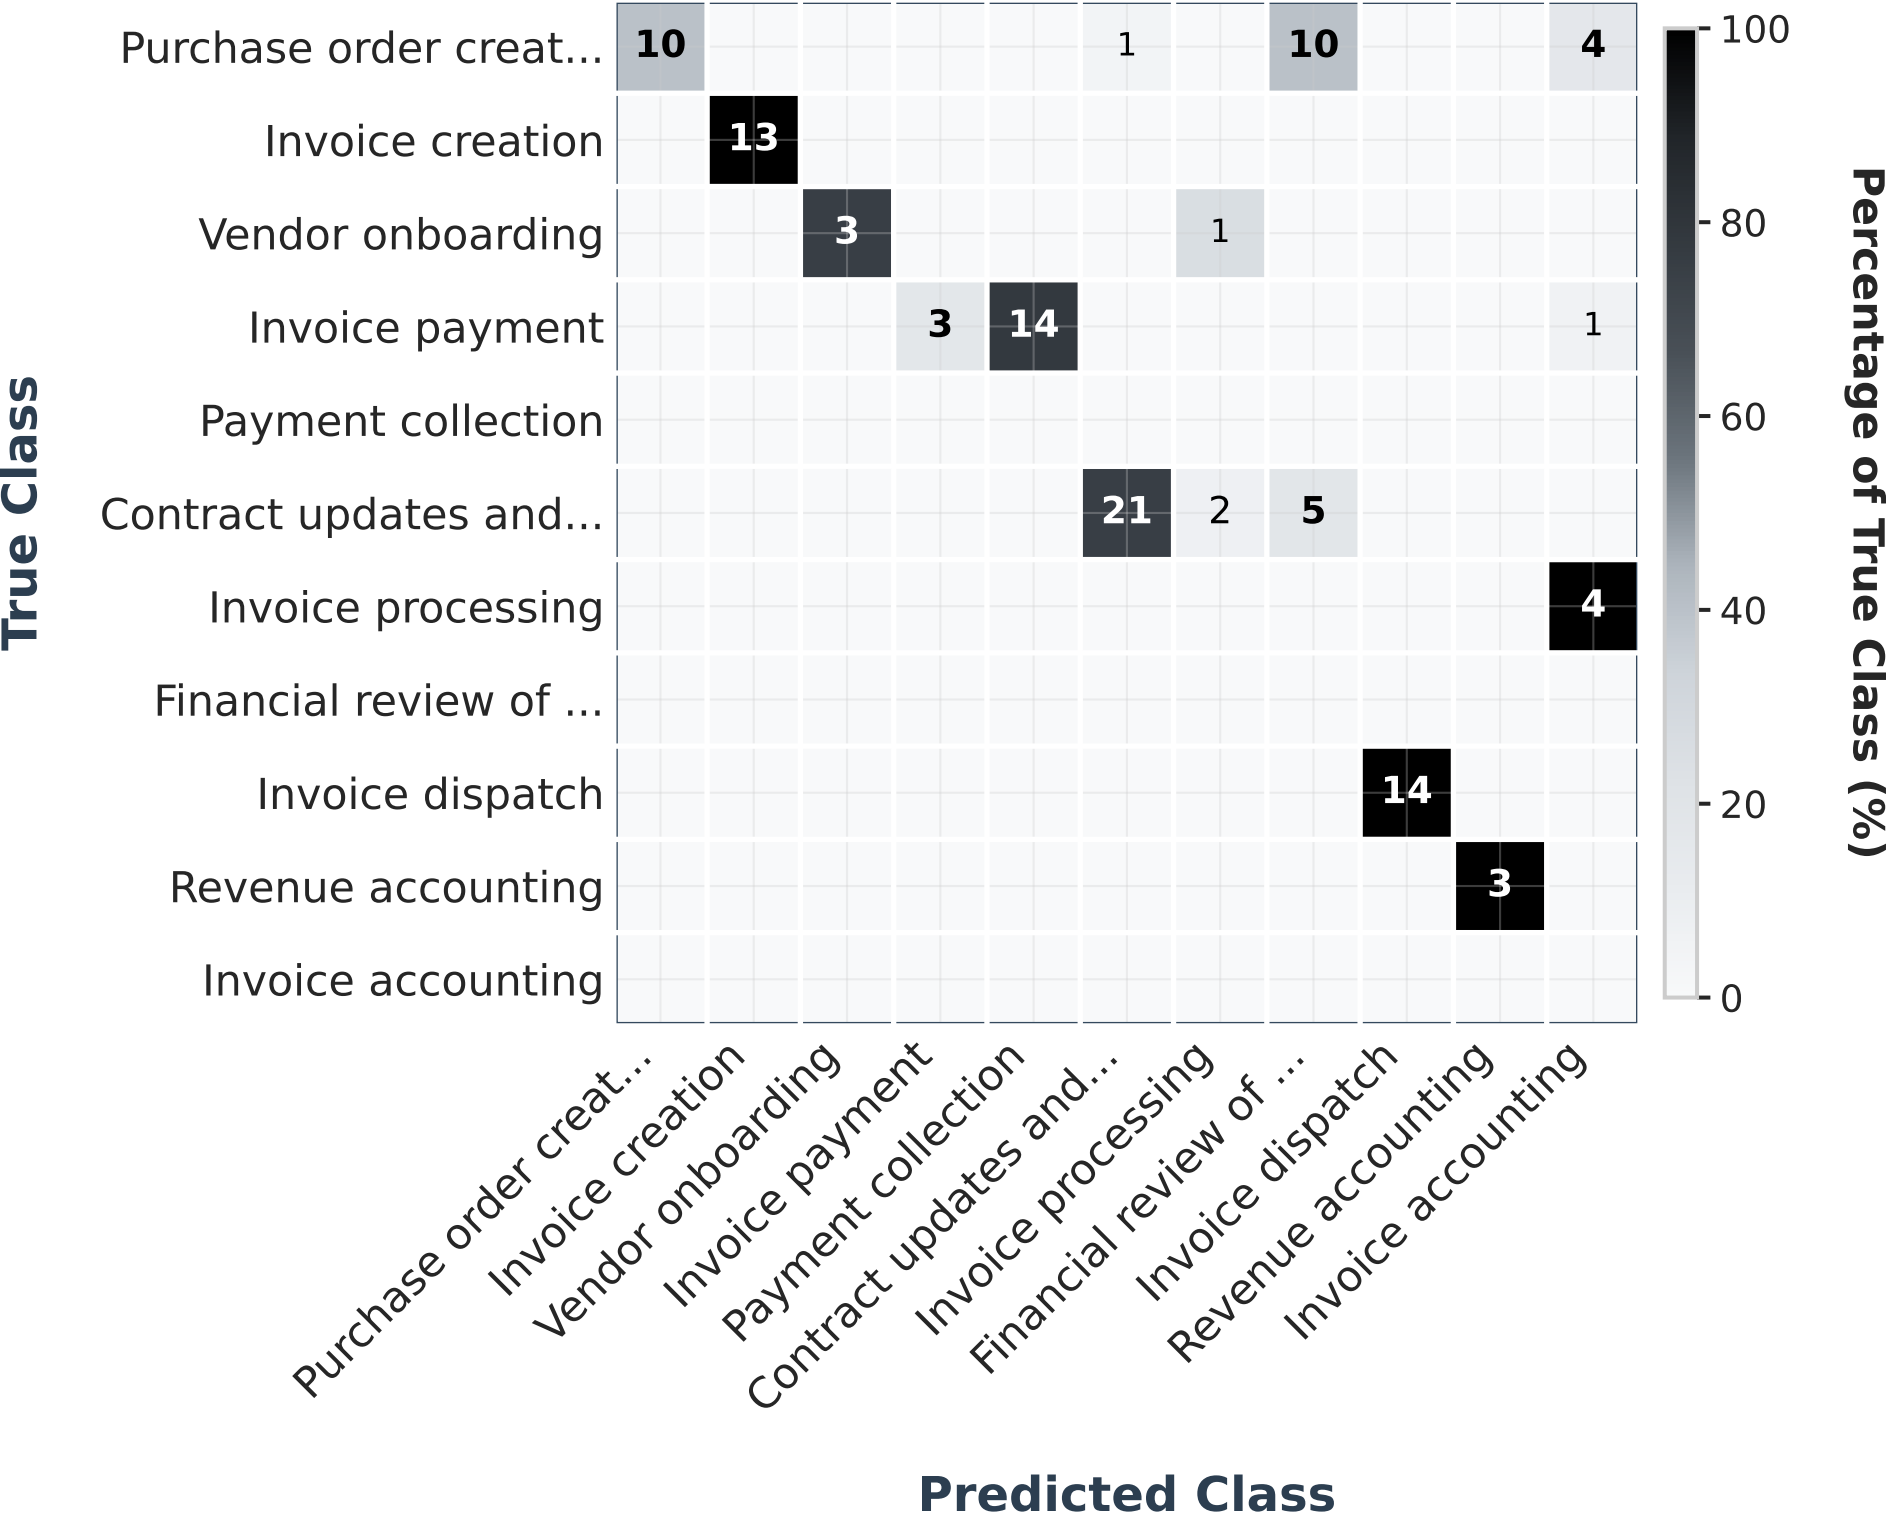

Supplement: supplementary_material [file finance_classification_gpt-4.1_confusion.pdf › entrophy-main/figures/finance_classification_gpt-4.1_confusion.pdf]

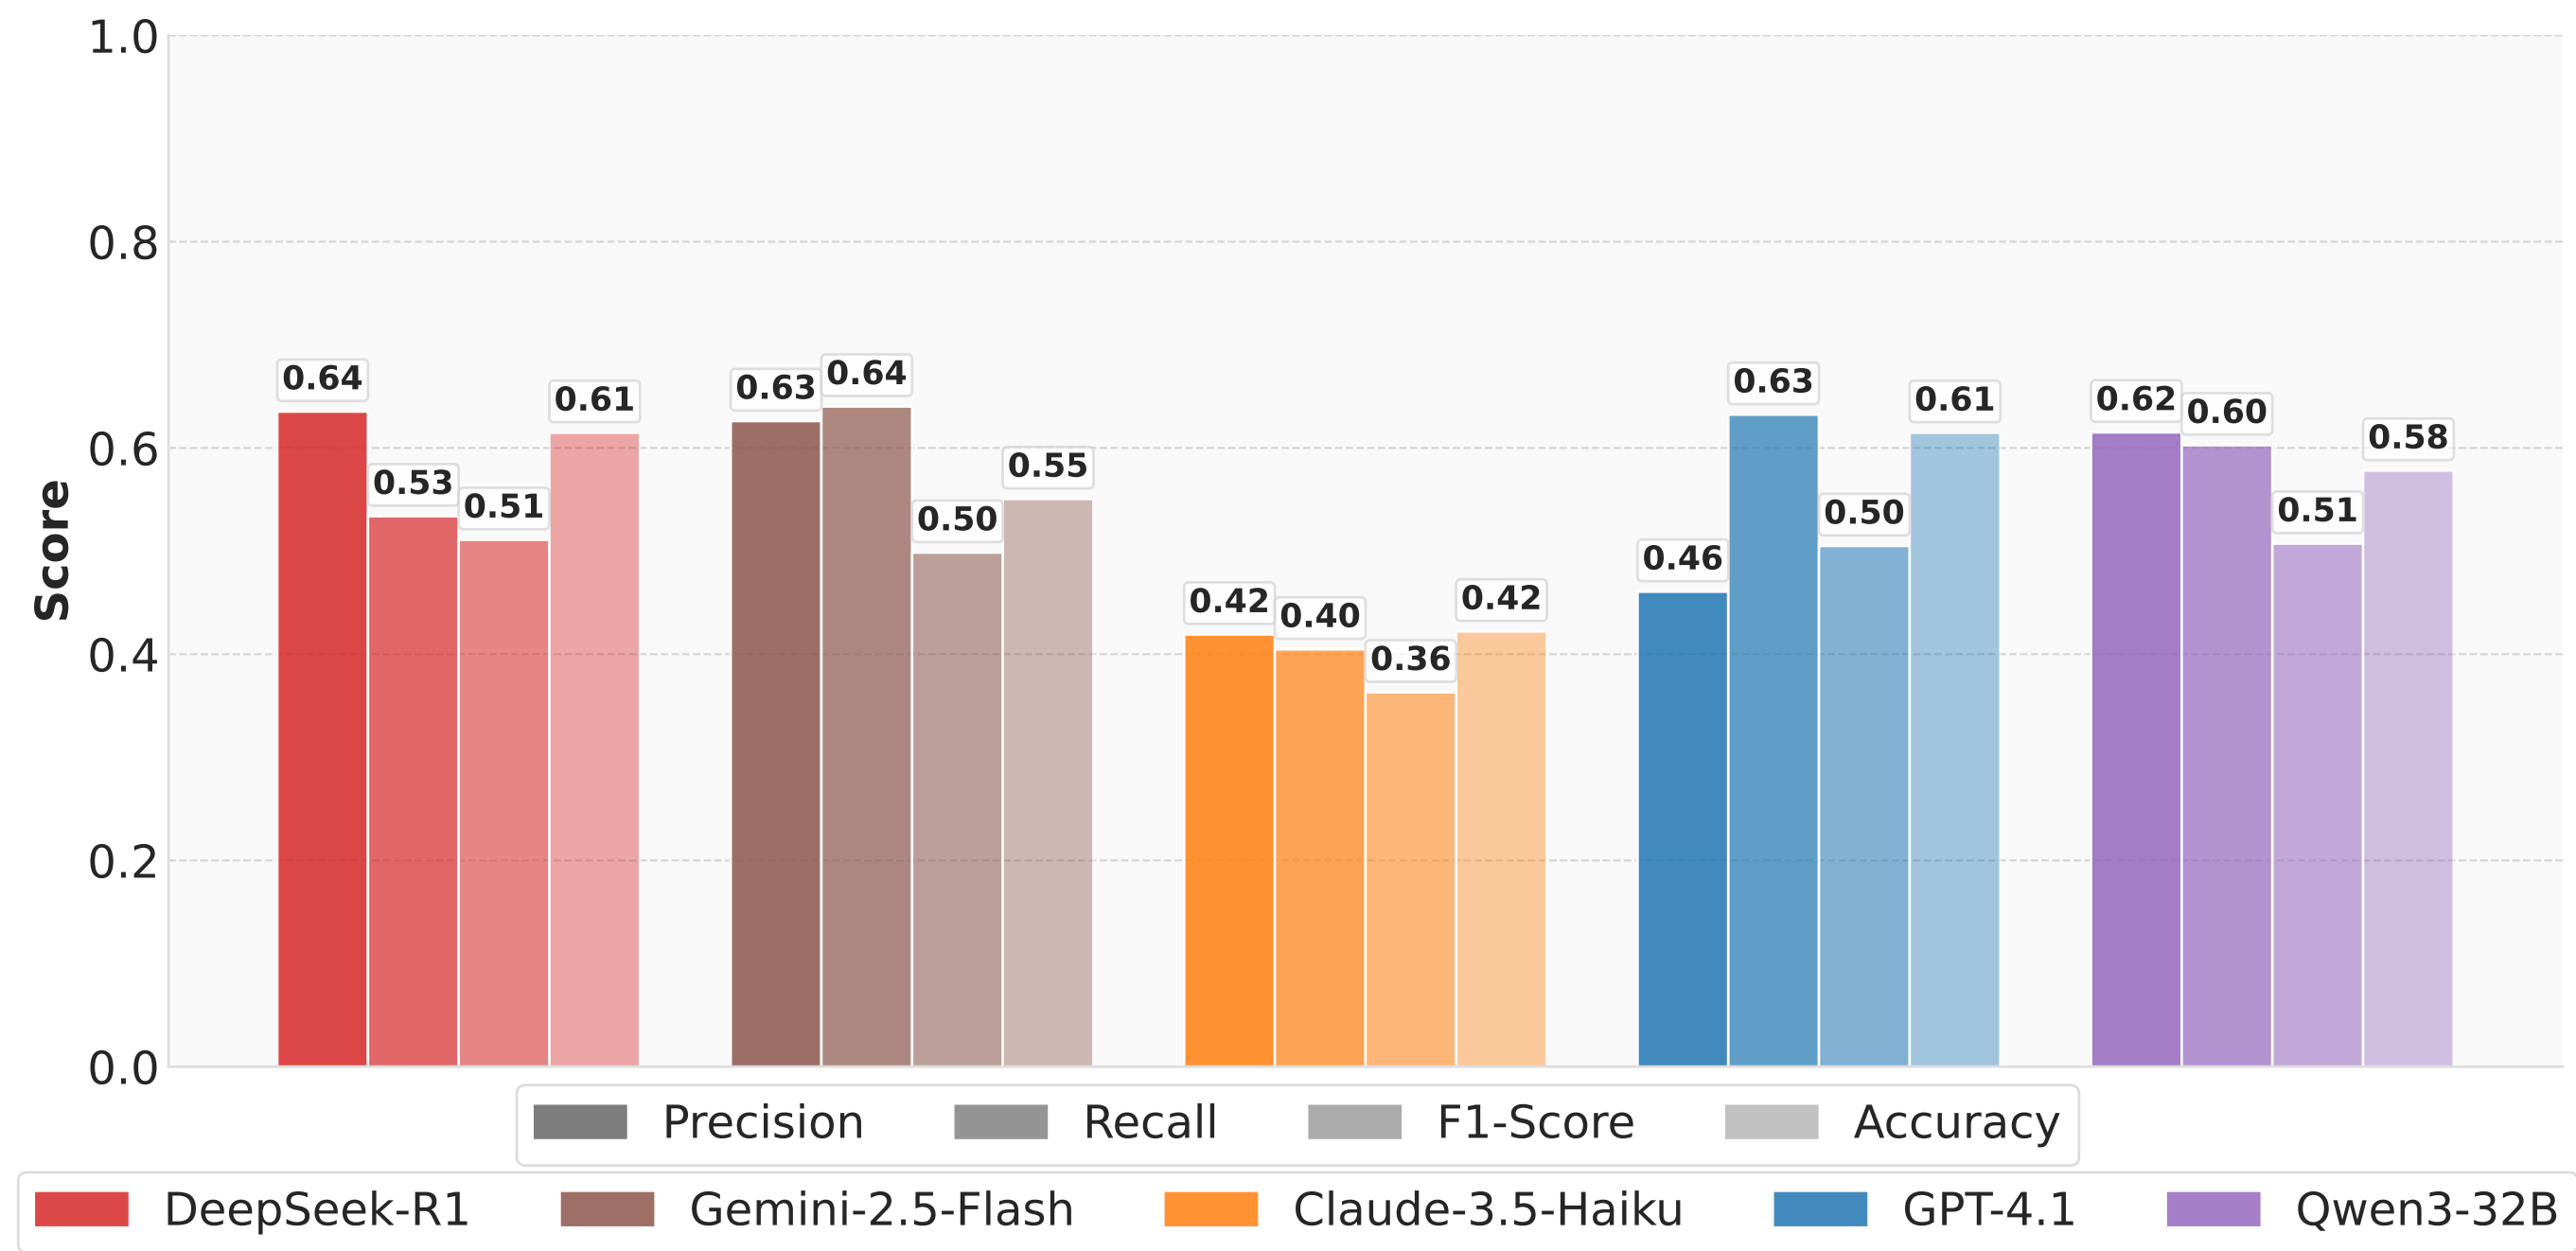

Supplement: supplementary_material [file finance_classification_metrics.pdf › entrophy-main/figures/finance_classification_metrics.pdf]

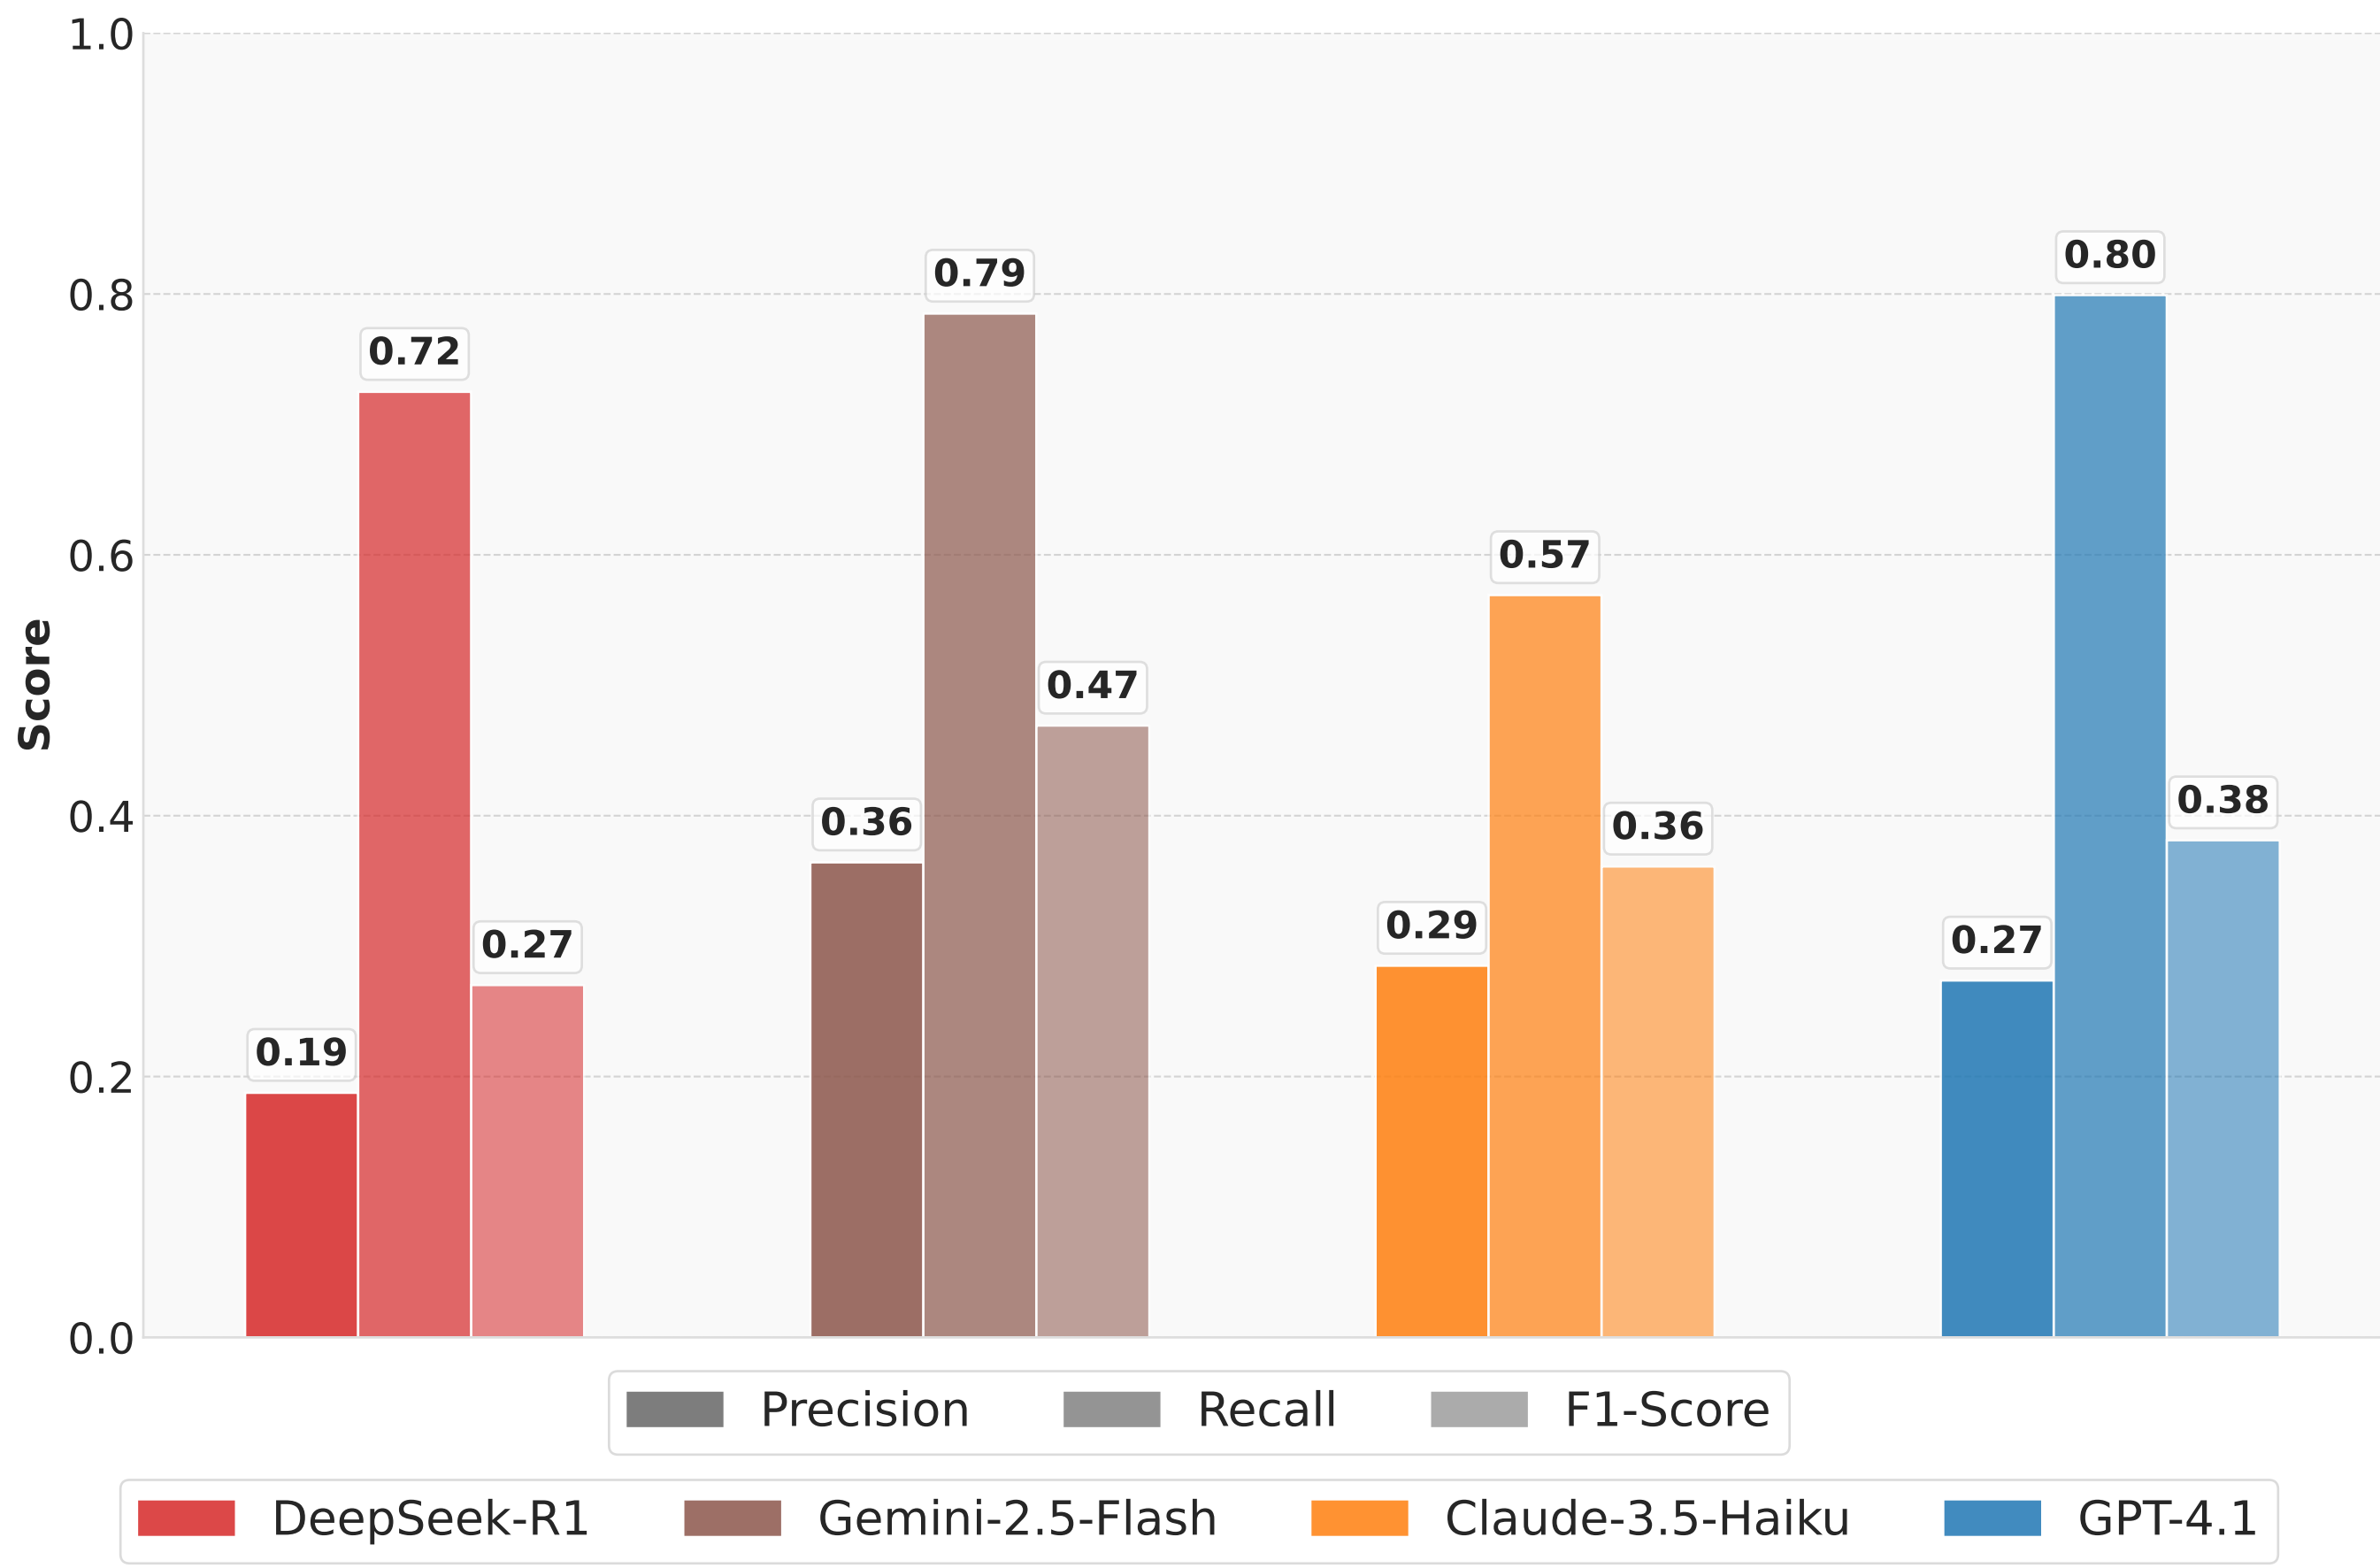

Supplement: supplementary_material [file finance_segmentation_boundary_metrics.pdf › entrophy-main/figures/finance_segmentation_boundary_metrics.pdf]

Class

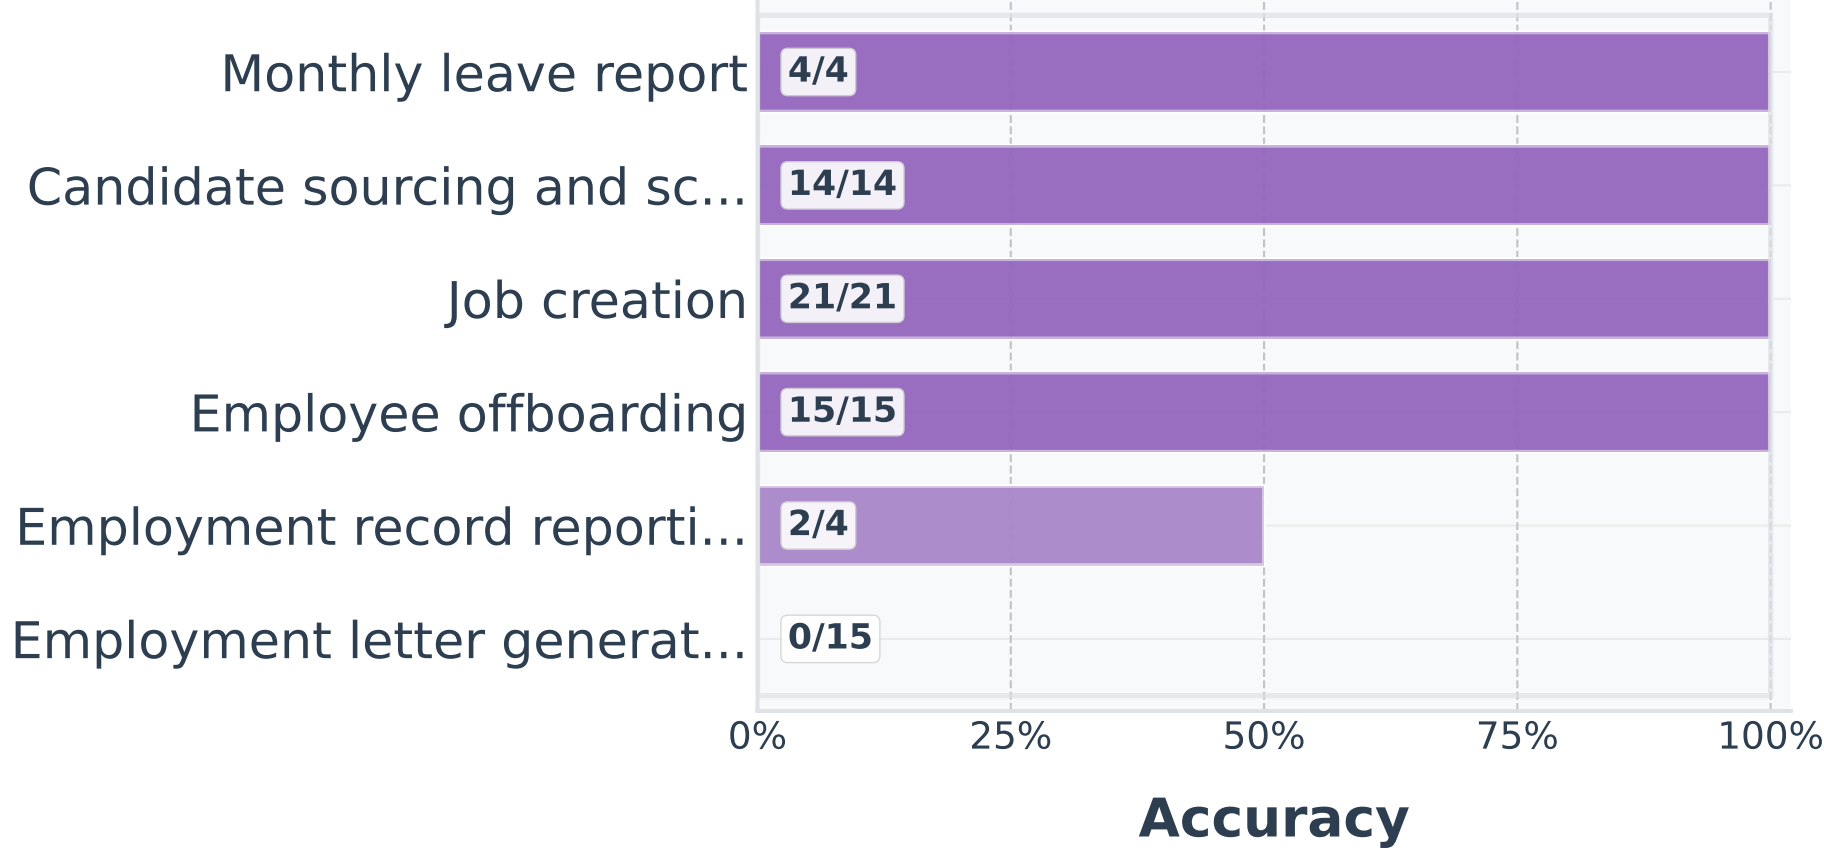

Supplement: supplementary_material [file hr_classification_Qwen3-32B_class_accuracy.pdf › entrophy-main/figures/hr_classification_Qwen3-32B_class_accuracy.pdf]

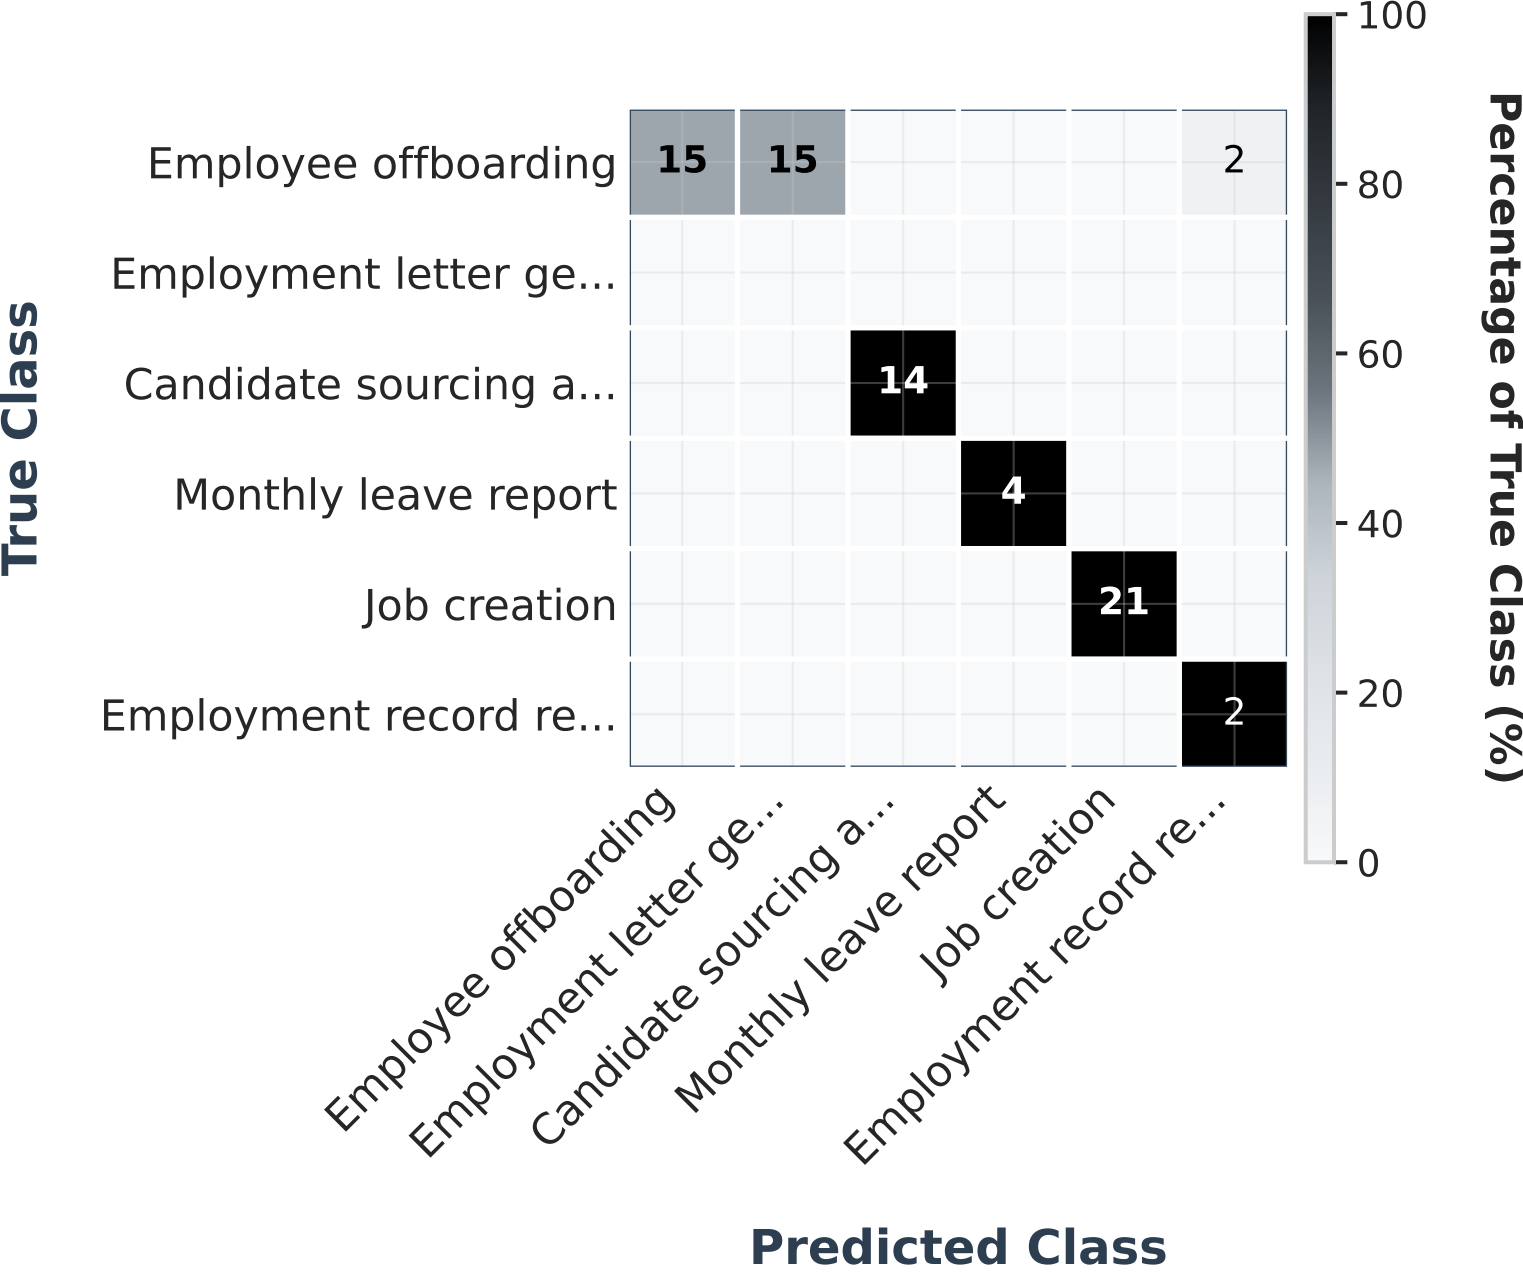

Supplement: supplementary_material [file hr_classification_Qwen3-32B_confusion.pdf › entrophy-main/figures/hr_classification_Qwen3-32B_confusion.pdf]

**Class**

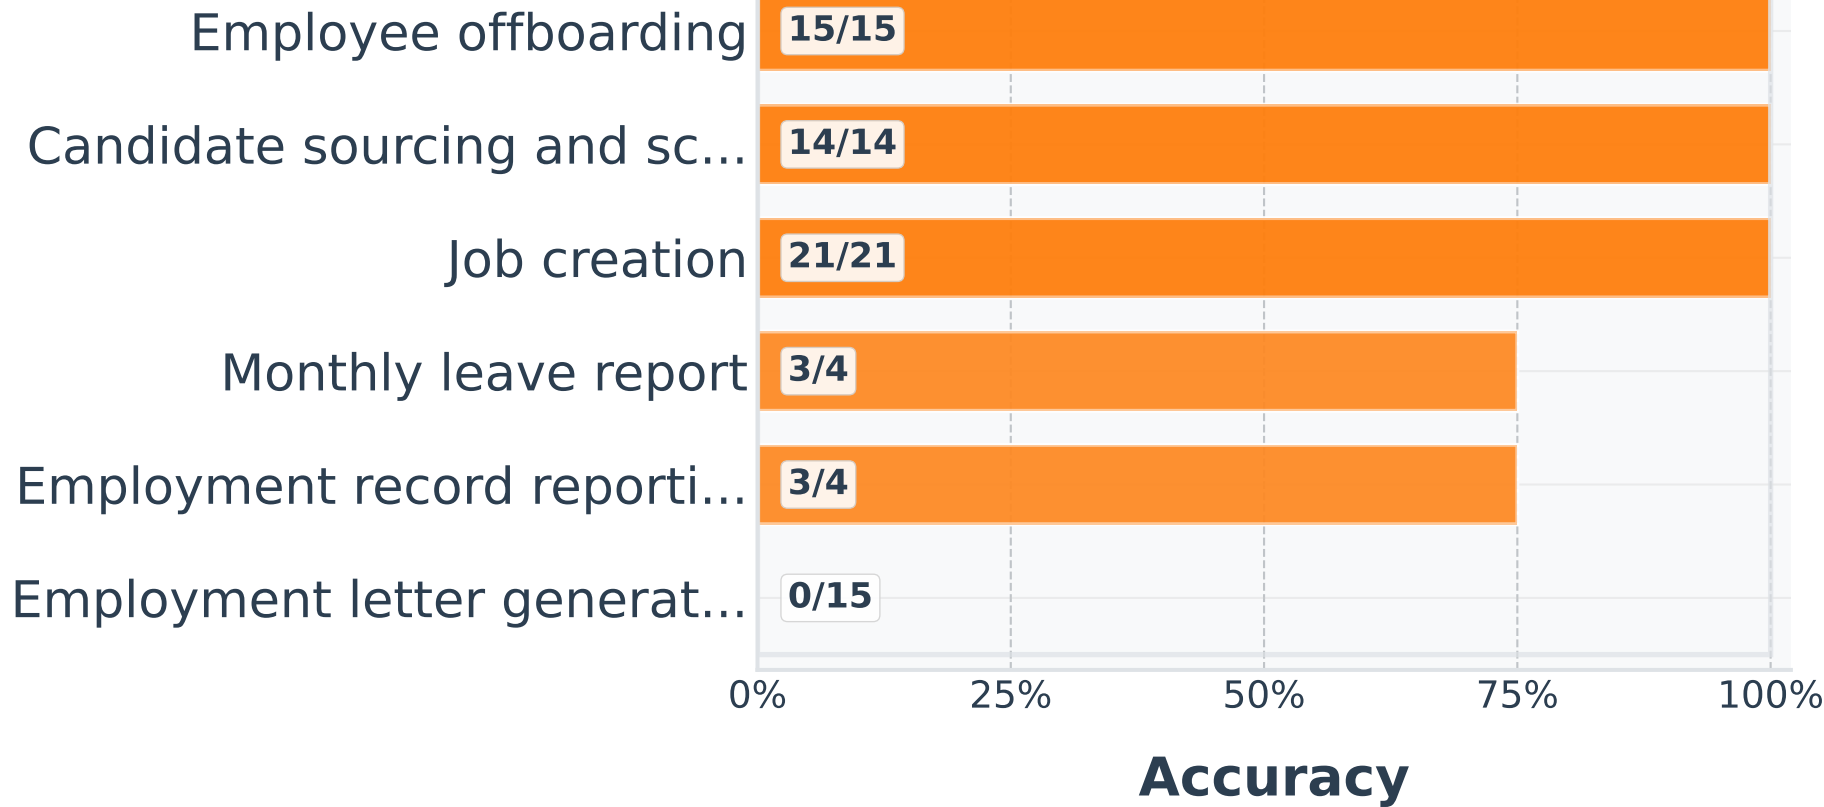

Supplement: supplementary_material [file hr_classification_claude-3.5-haiku_class_accuracy.pdf › entrophy-main/figures/hr_classification_claude-3.5-haiku_class_accuracy.pdf]

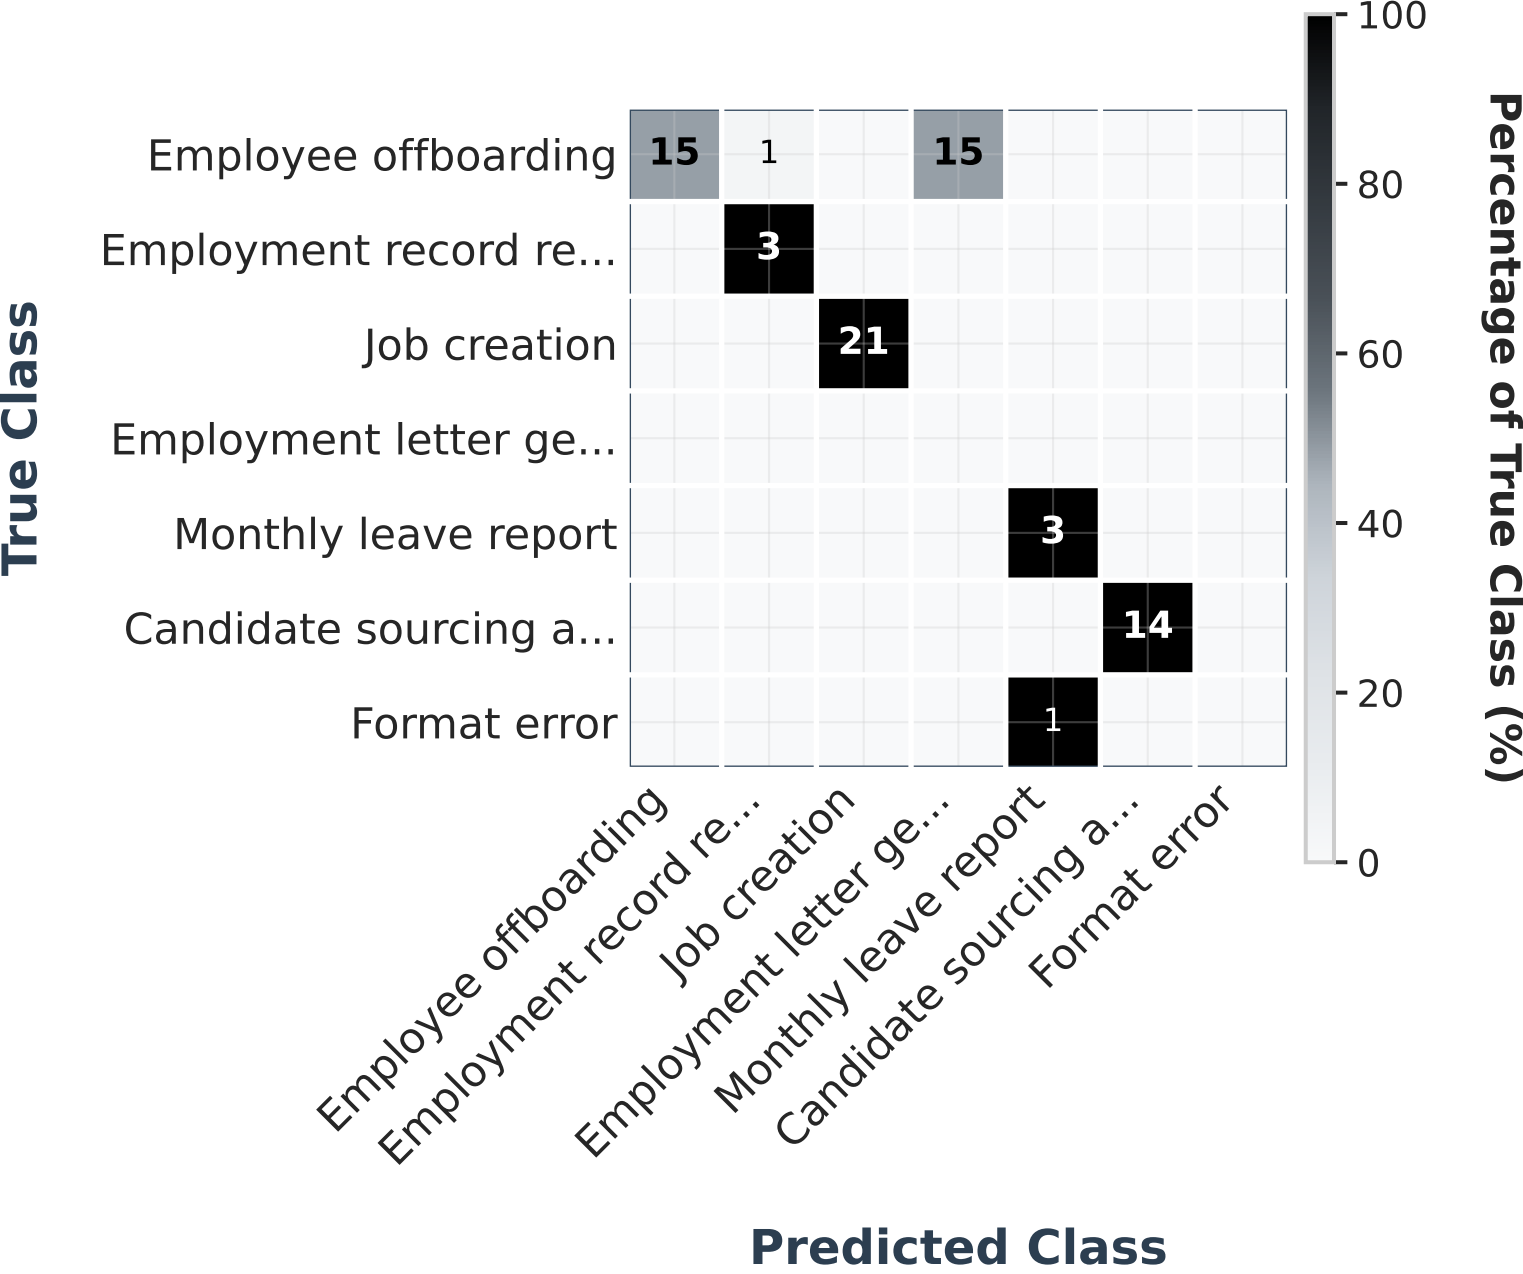

Supplement: supplementary_material [file hr_classification_claude-3.5-haiku_confusion.pdf › entrophy-main/figures/hr_classification_claude-3.5-haiku_confusion.pdf]

Class

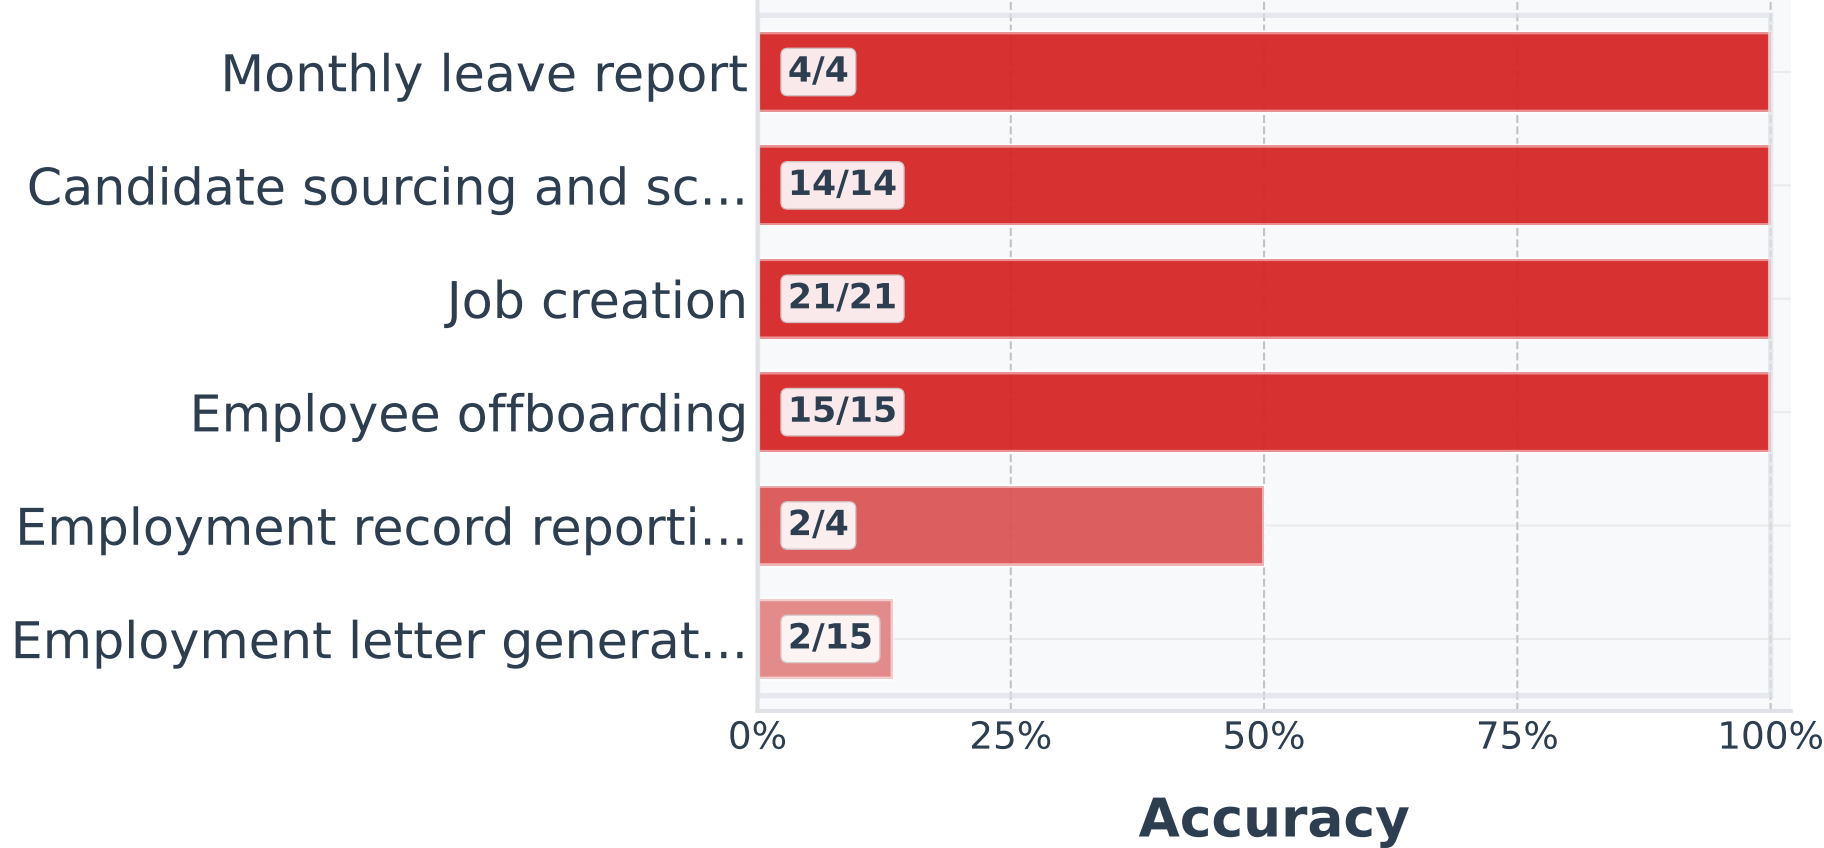

Supplement: supplementary_material [file hr_classification_deepseek-r1_class_accuracy.pdf › entrophy-main/figures/hr_classification_deepseek-r1_class_accuracy.pdf]

True Class

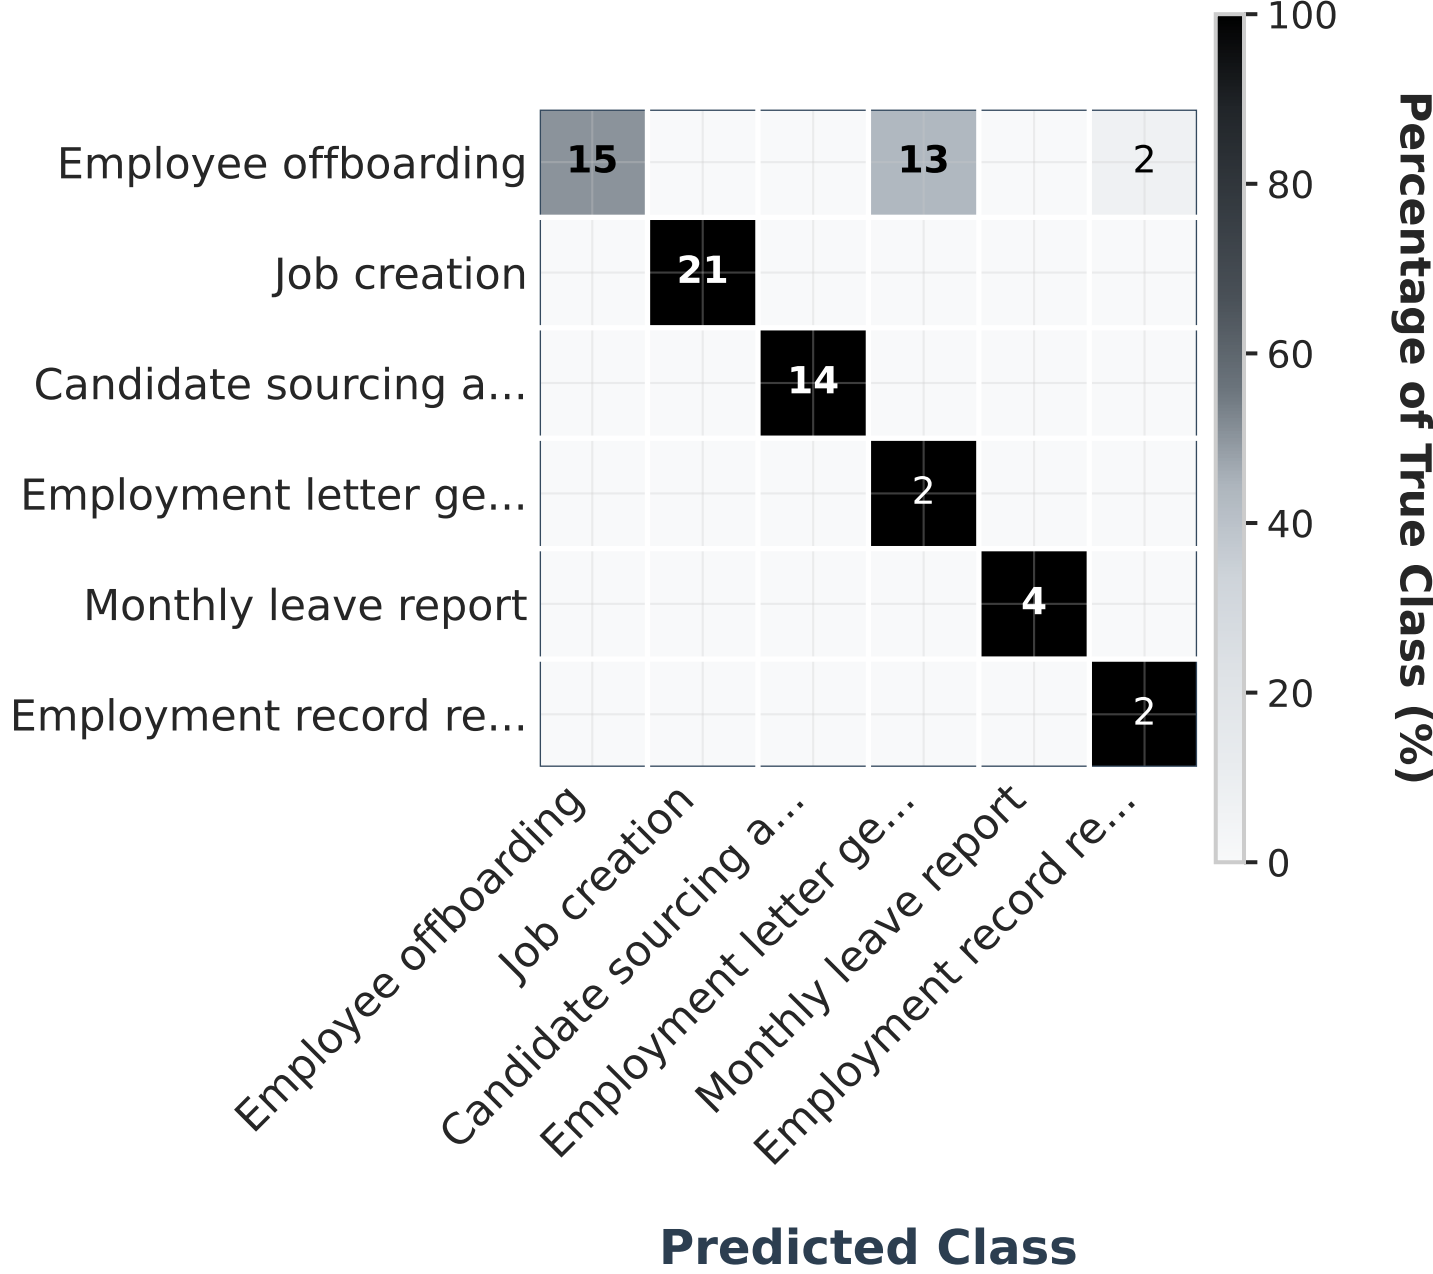

Percentage of True Class (%)

Predicted Class

Supplement: supplementary_material [file hr_classification_deepseek-r1_confusion.pdf › entrophy-main/figures/hr_classification_deepseek-r1_confusion.pdf]

Class

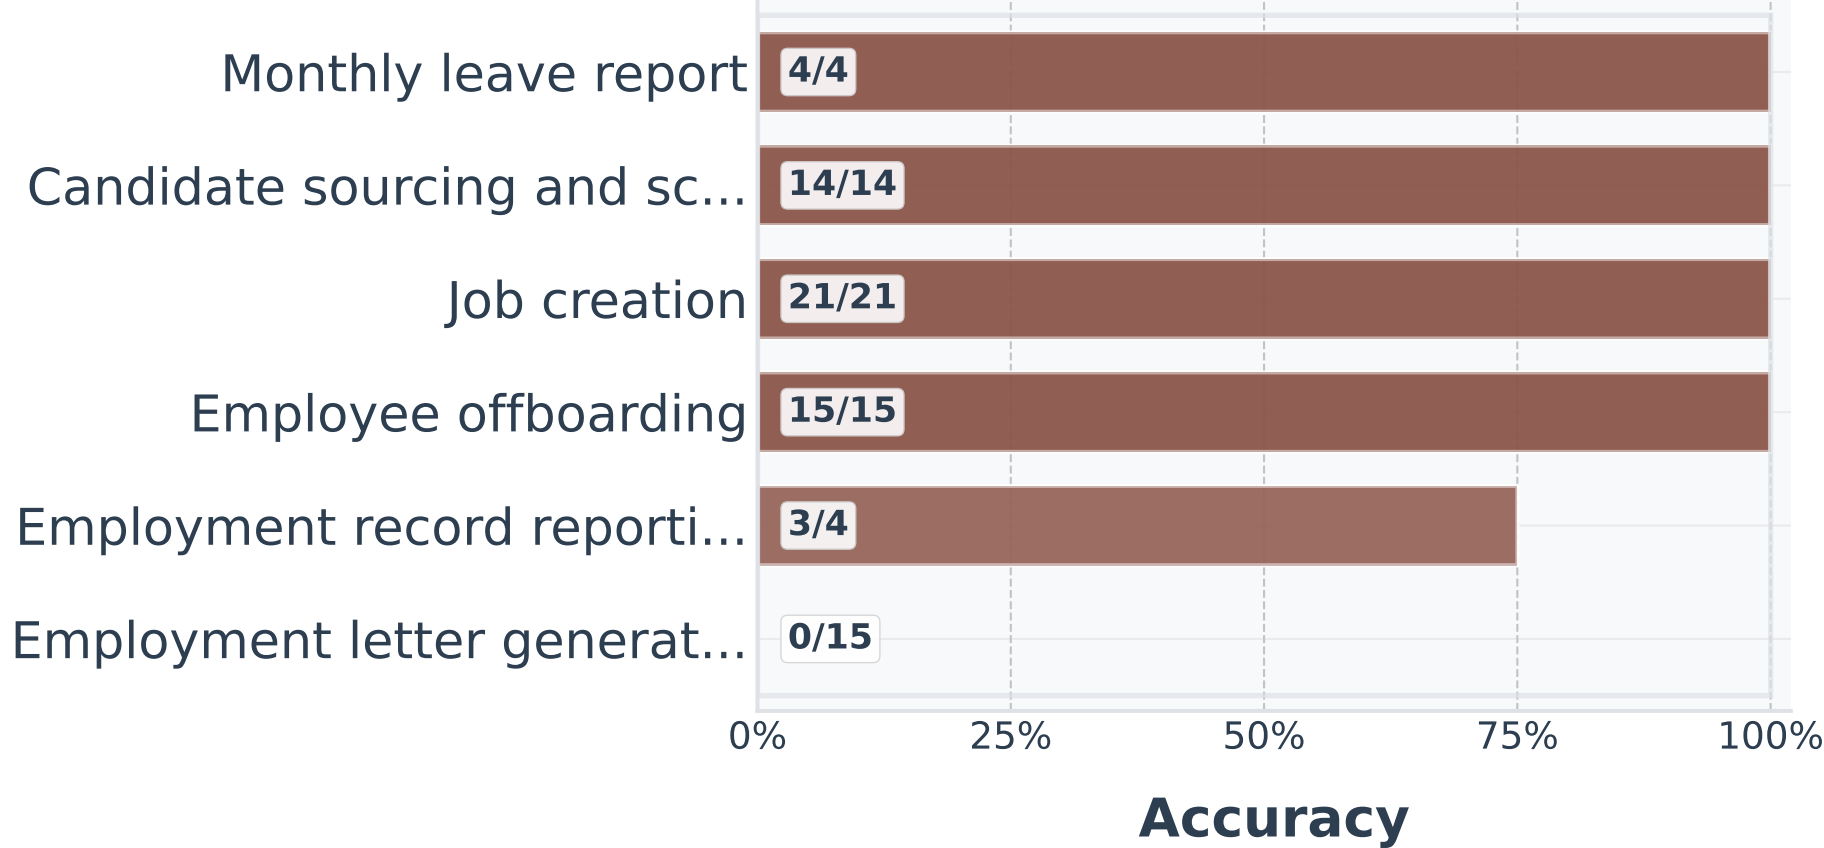

Supplement: supplementary_material [file hr_classification_gemini-2.5-flash_class_accuracy.pdf › entrophy-main/figures/hr_classification_gemini-2.5-flash_class_accuracy.pdf]

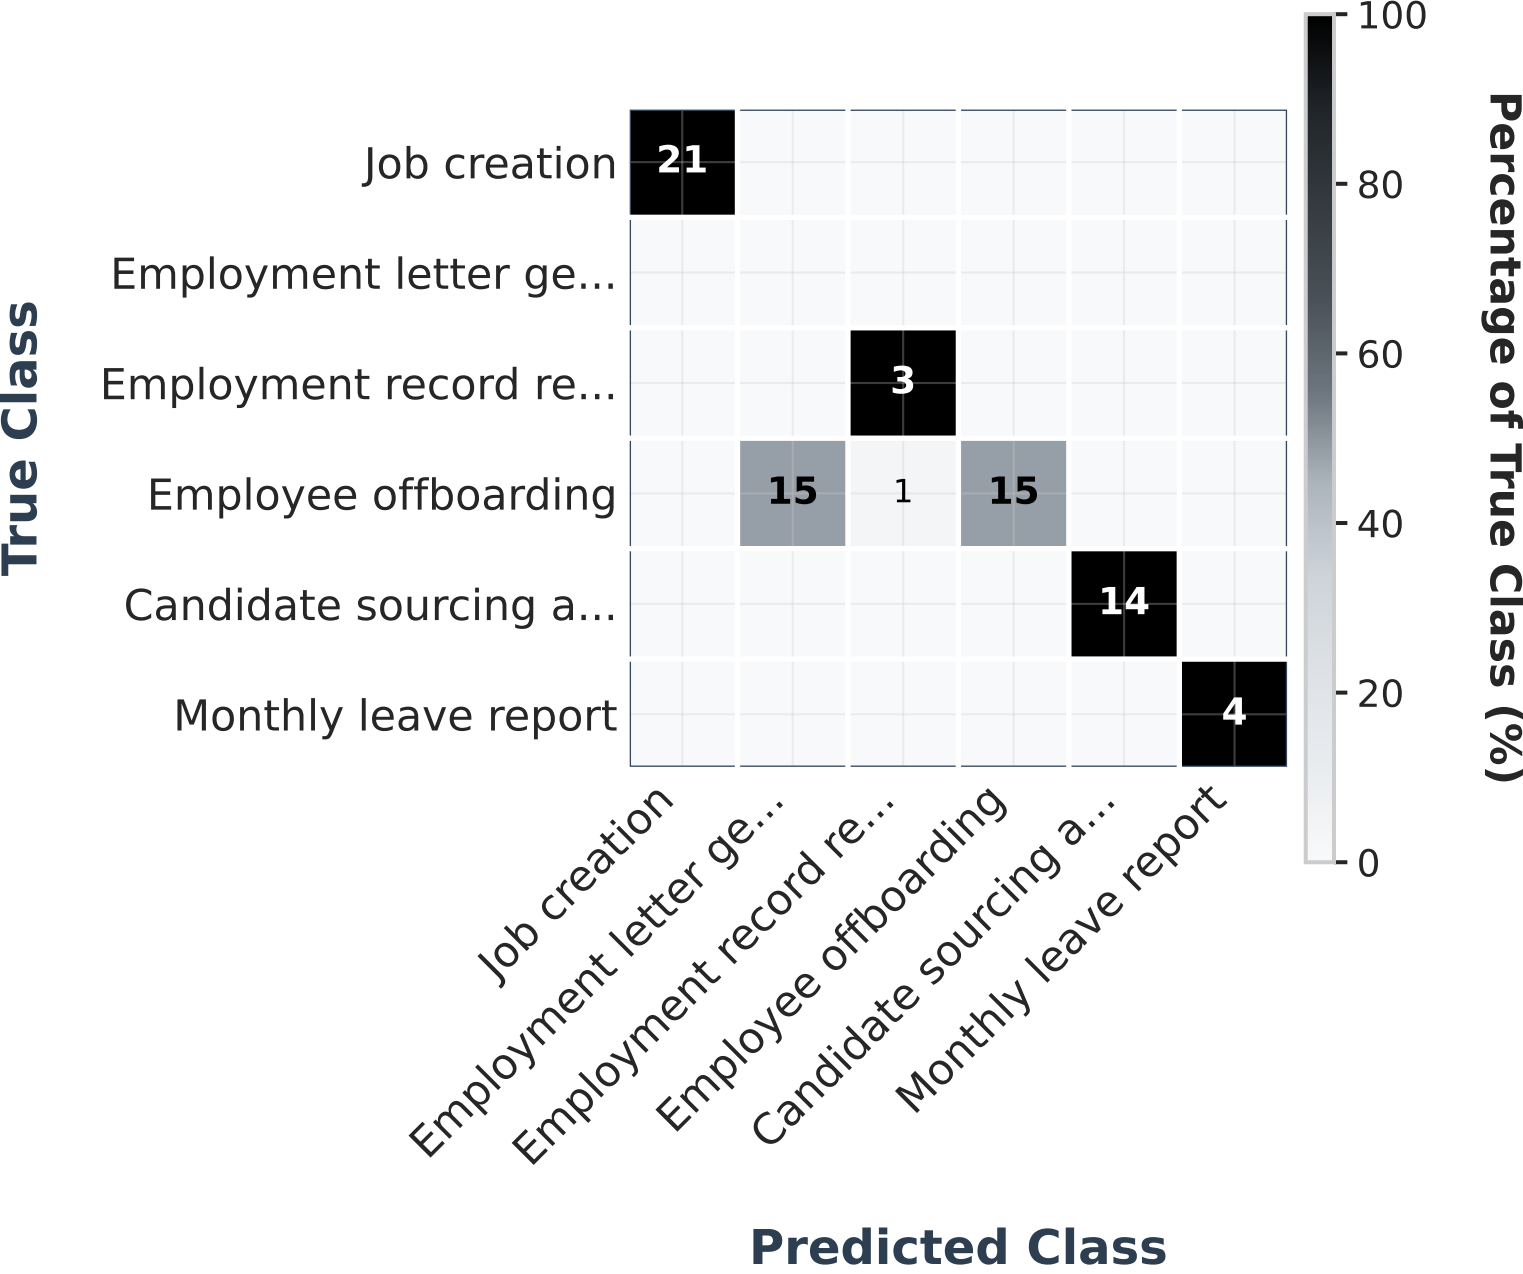

Supplement: supplementary_material [file hr_classification_gemini-2.5-flash_confusion.pdf › entrophy-main/figures/hr_classification_gemini-2.5-flash_confusion.pdf]

Class

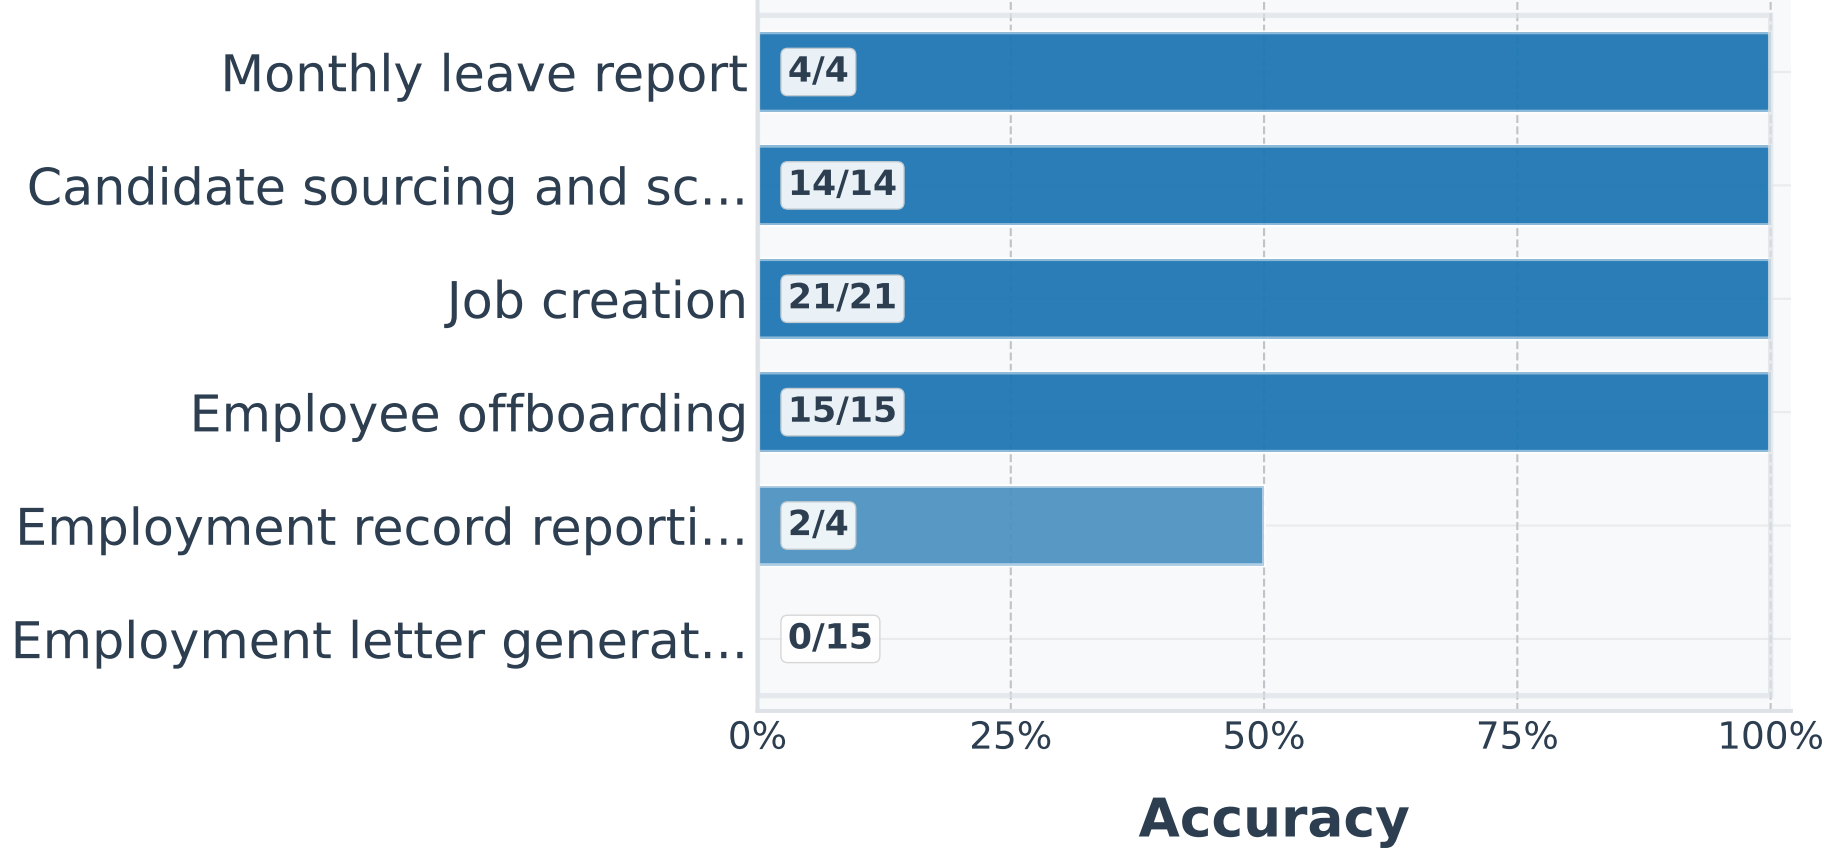

Supplement: supplementary_material [file hr_classification_gpt-4.1_class_accuracy.pdf › entrophy-main/figures/hr_classification_gpt-4.1_class_accuracy.pdf]

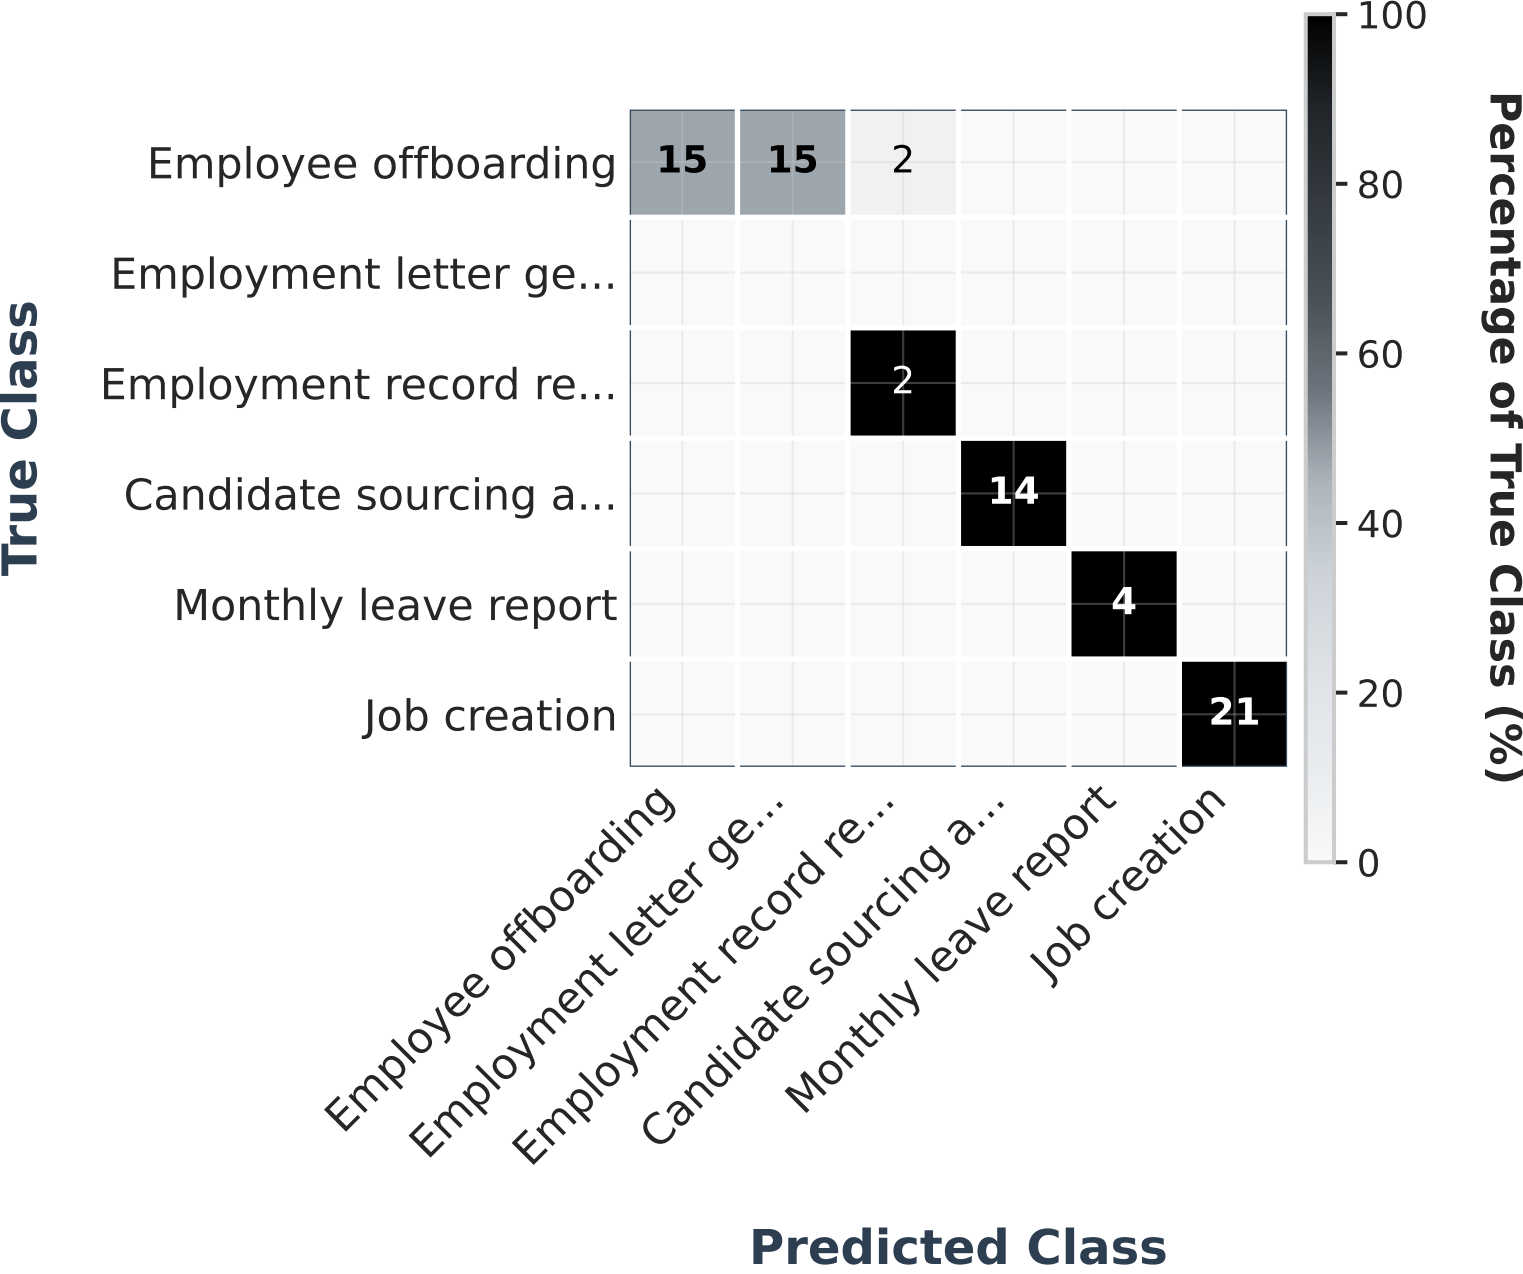

Supplement: supplementary_material [file hr_classification_gpt-4.1_confusion.pdf › entrophy-main/figures/hr_classification_gpt-4.1_confusion.pdf]

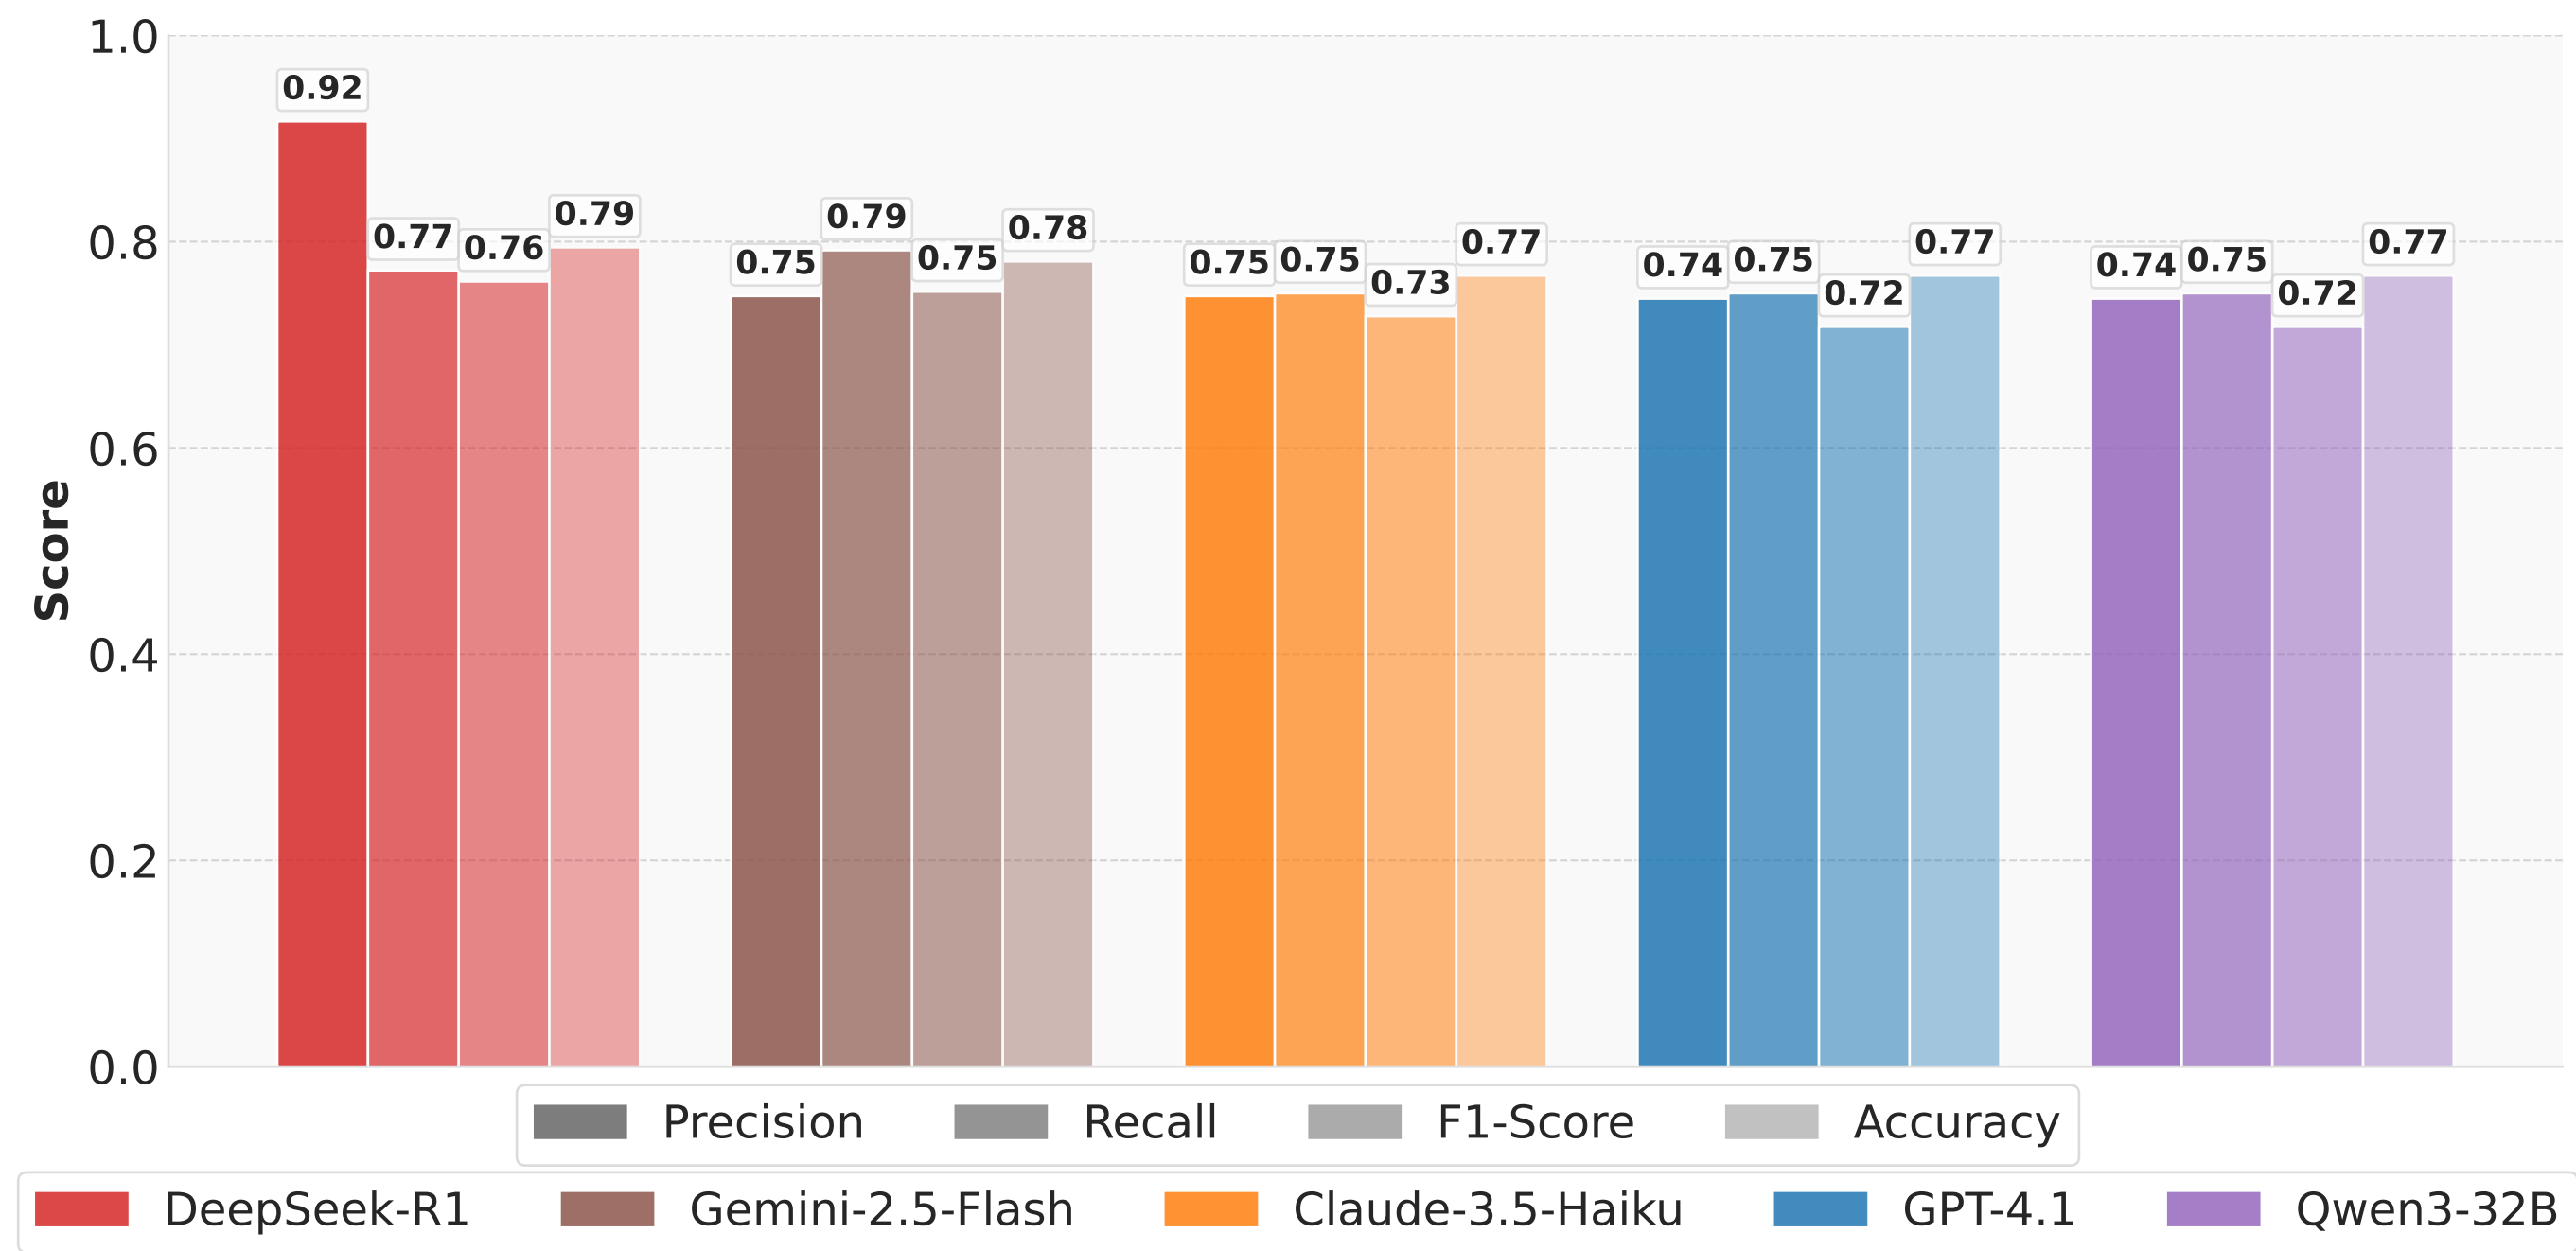

Supplement: supplementary_material [file hr_classification_metrics.pdf › entrophy-main/figures/hr_classification_metrics.pdf]

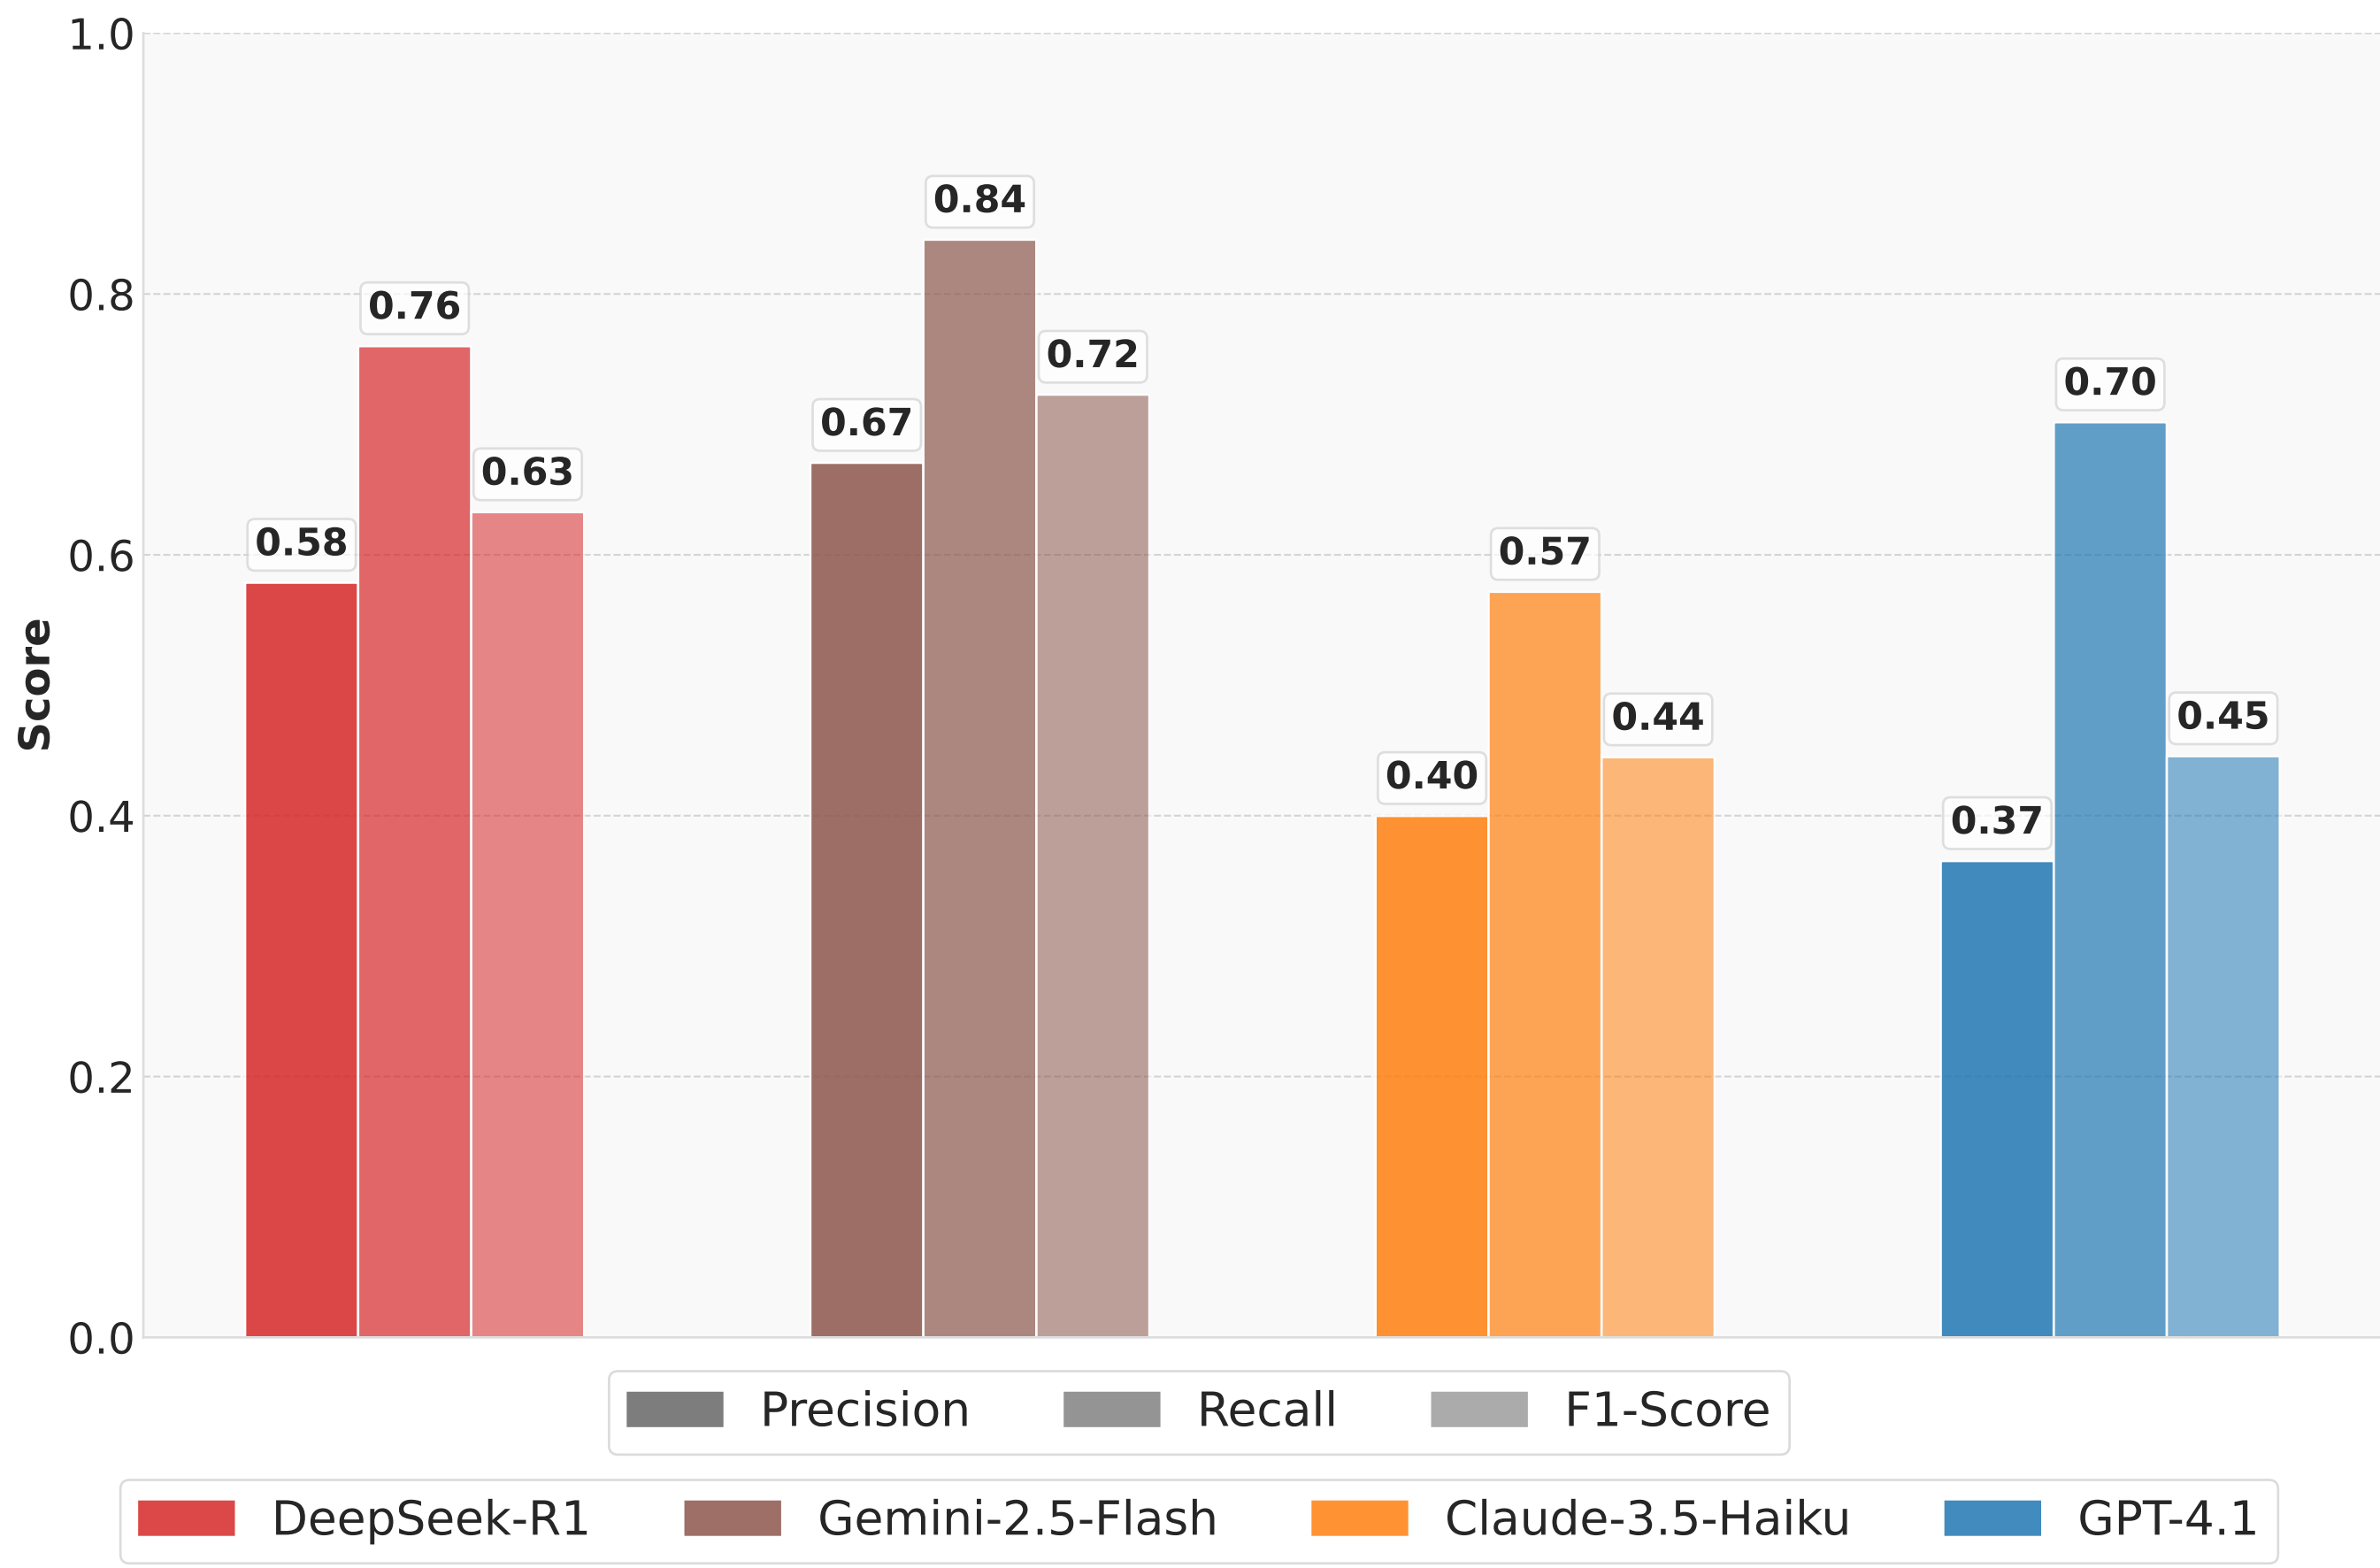

Supplement: supplementary_material [file hr_segmentation_boundary_metrics.pdf › entrophy-main/figures/hr_segmentation_boundary_metrics.pdf]

Class

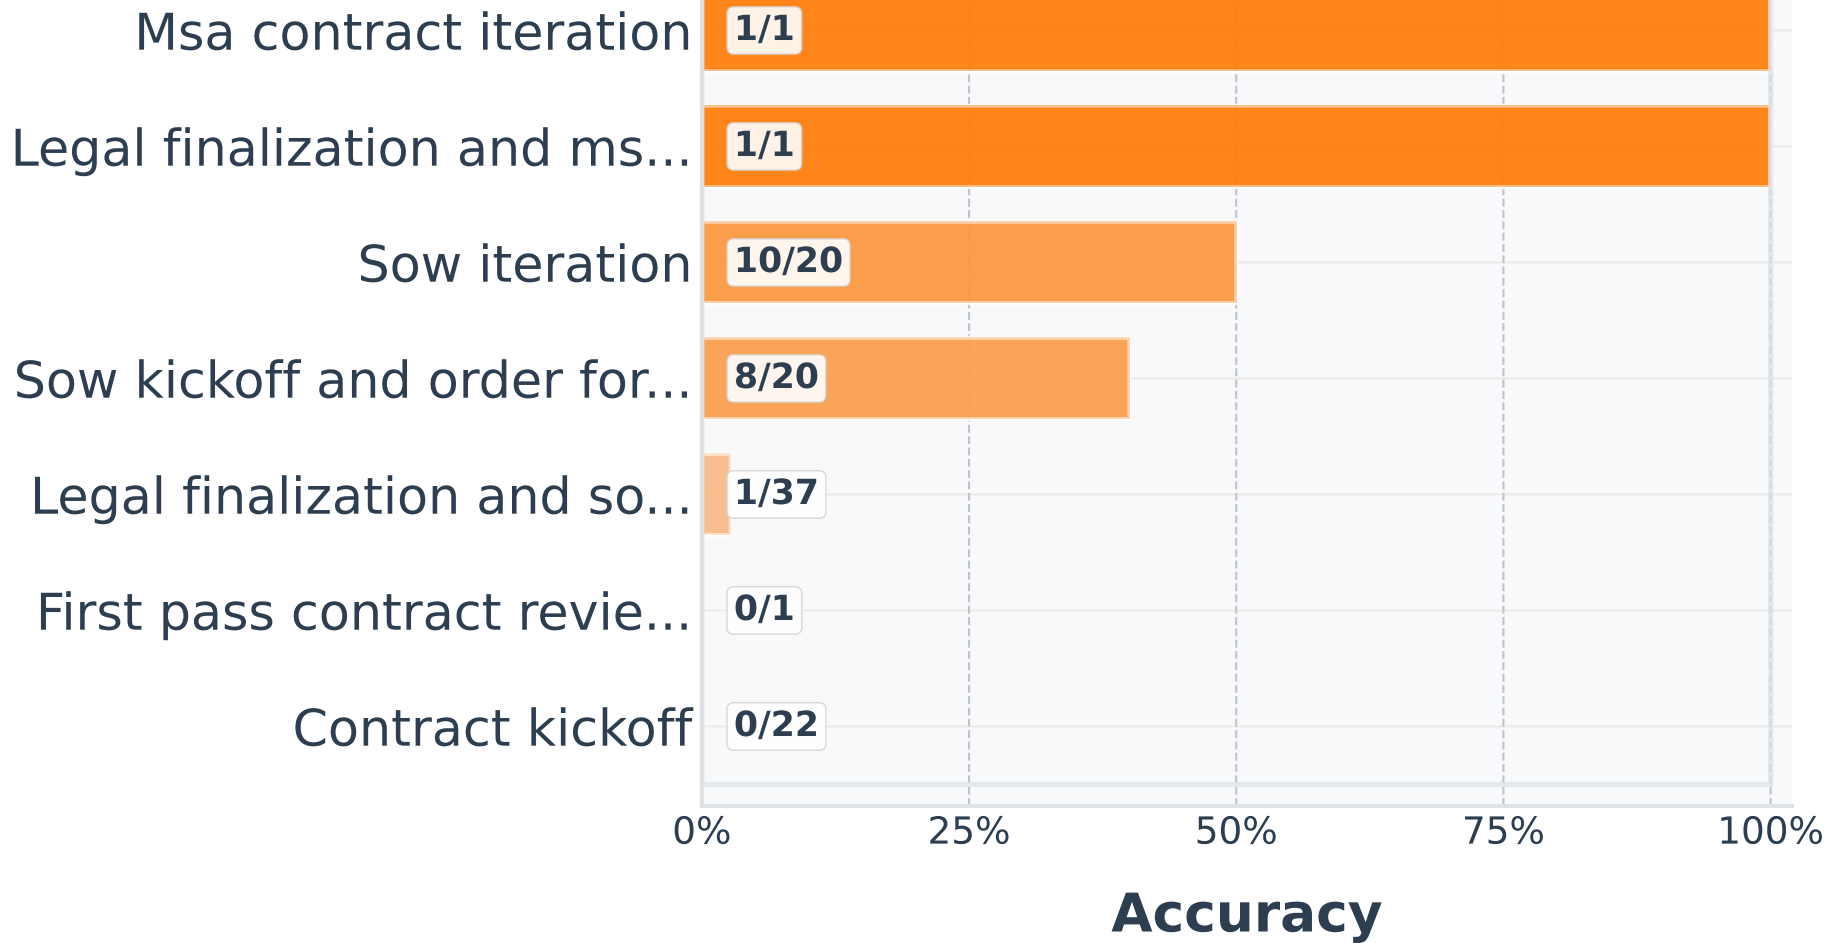

Supplement: supplementary_material [file legal_classification_claude-3.5-haiku_class_accuracy.pdf › entrophy-main/figures/legal_classification_claude-3.5-haiku_class_accuracy.pdf]

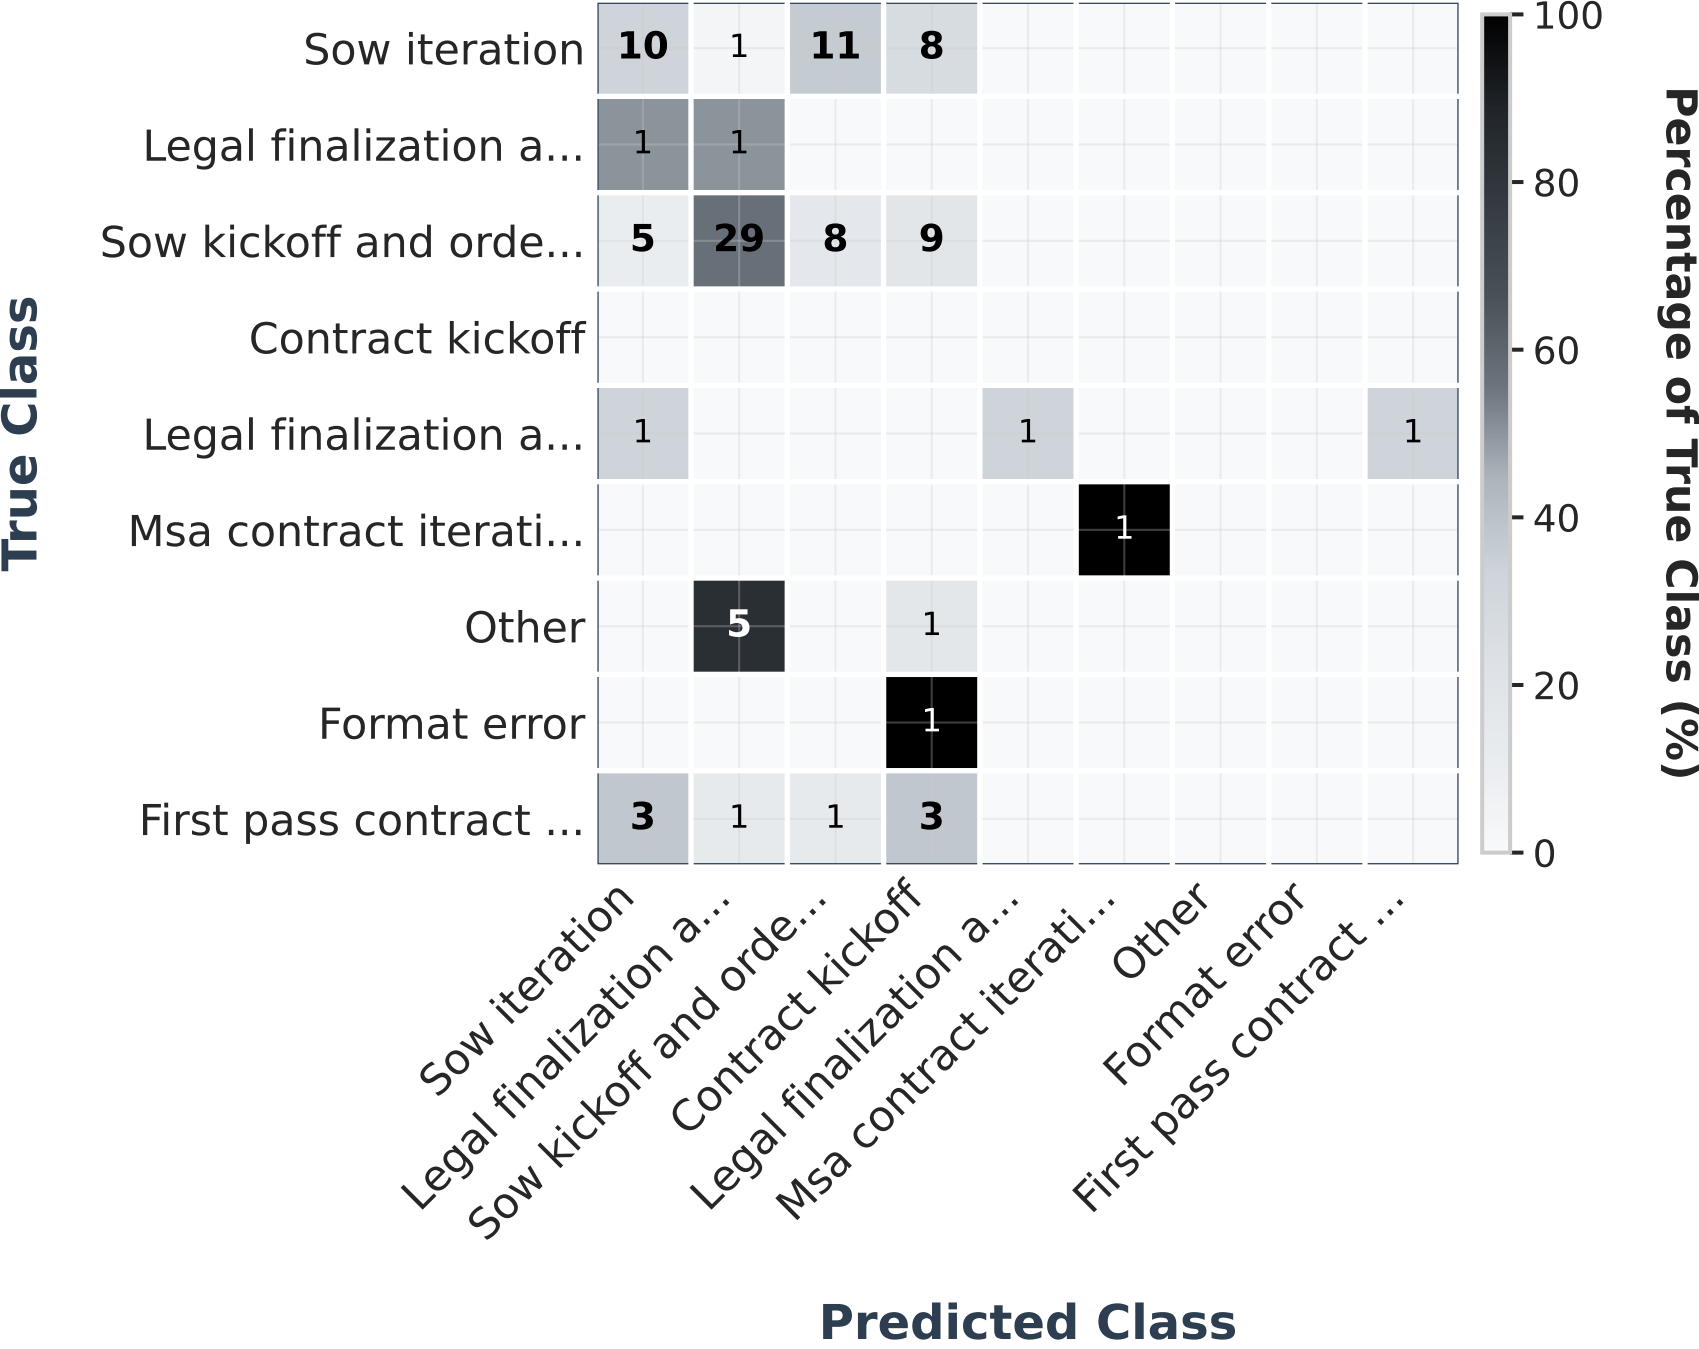

Supplement: supplementary_material [file legal_classification_claude-3.5-haiku_confusion.pdf › entrophy-main/figures/legal_classification_claude-3.5-haiku_confusion.pdf]

True Class

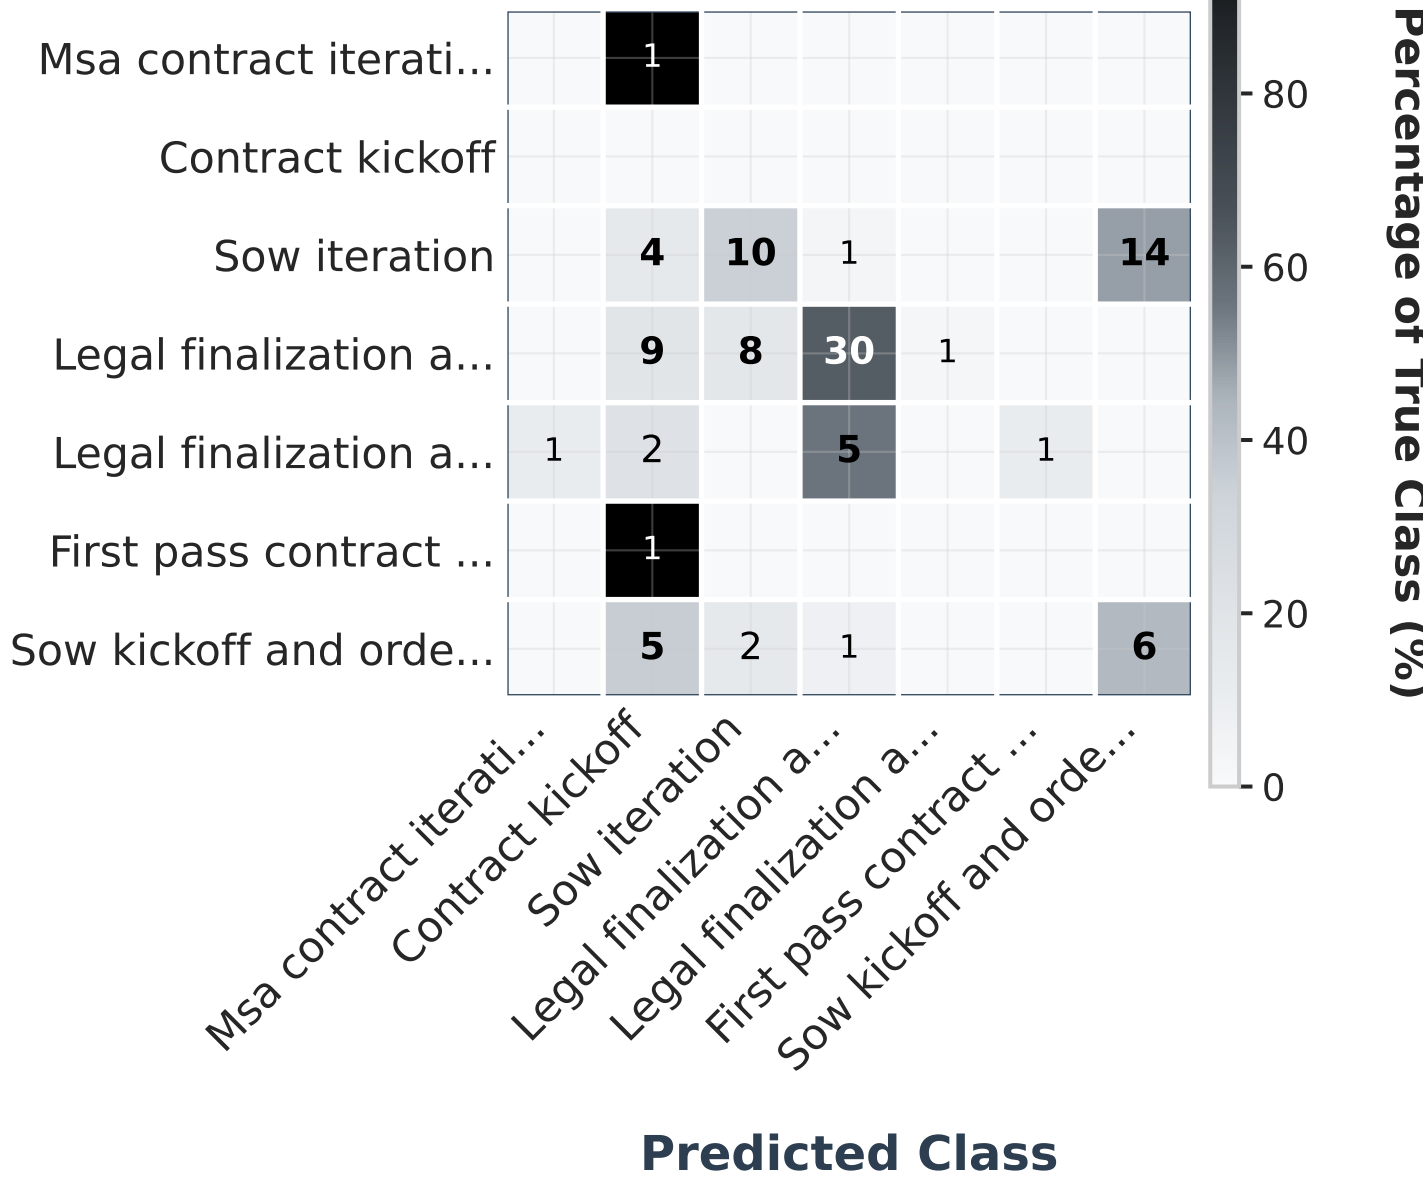

Supplement: supplementary_material [file legal_classification_deepseek-r1_confusion.pdf › entrophy-main/figures/legal_classification_deepseek-r1_confusion.pdf]

Class

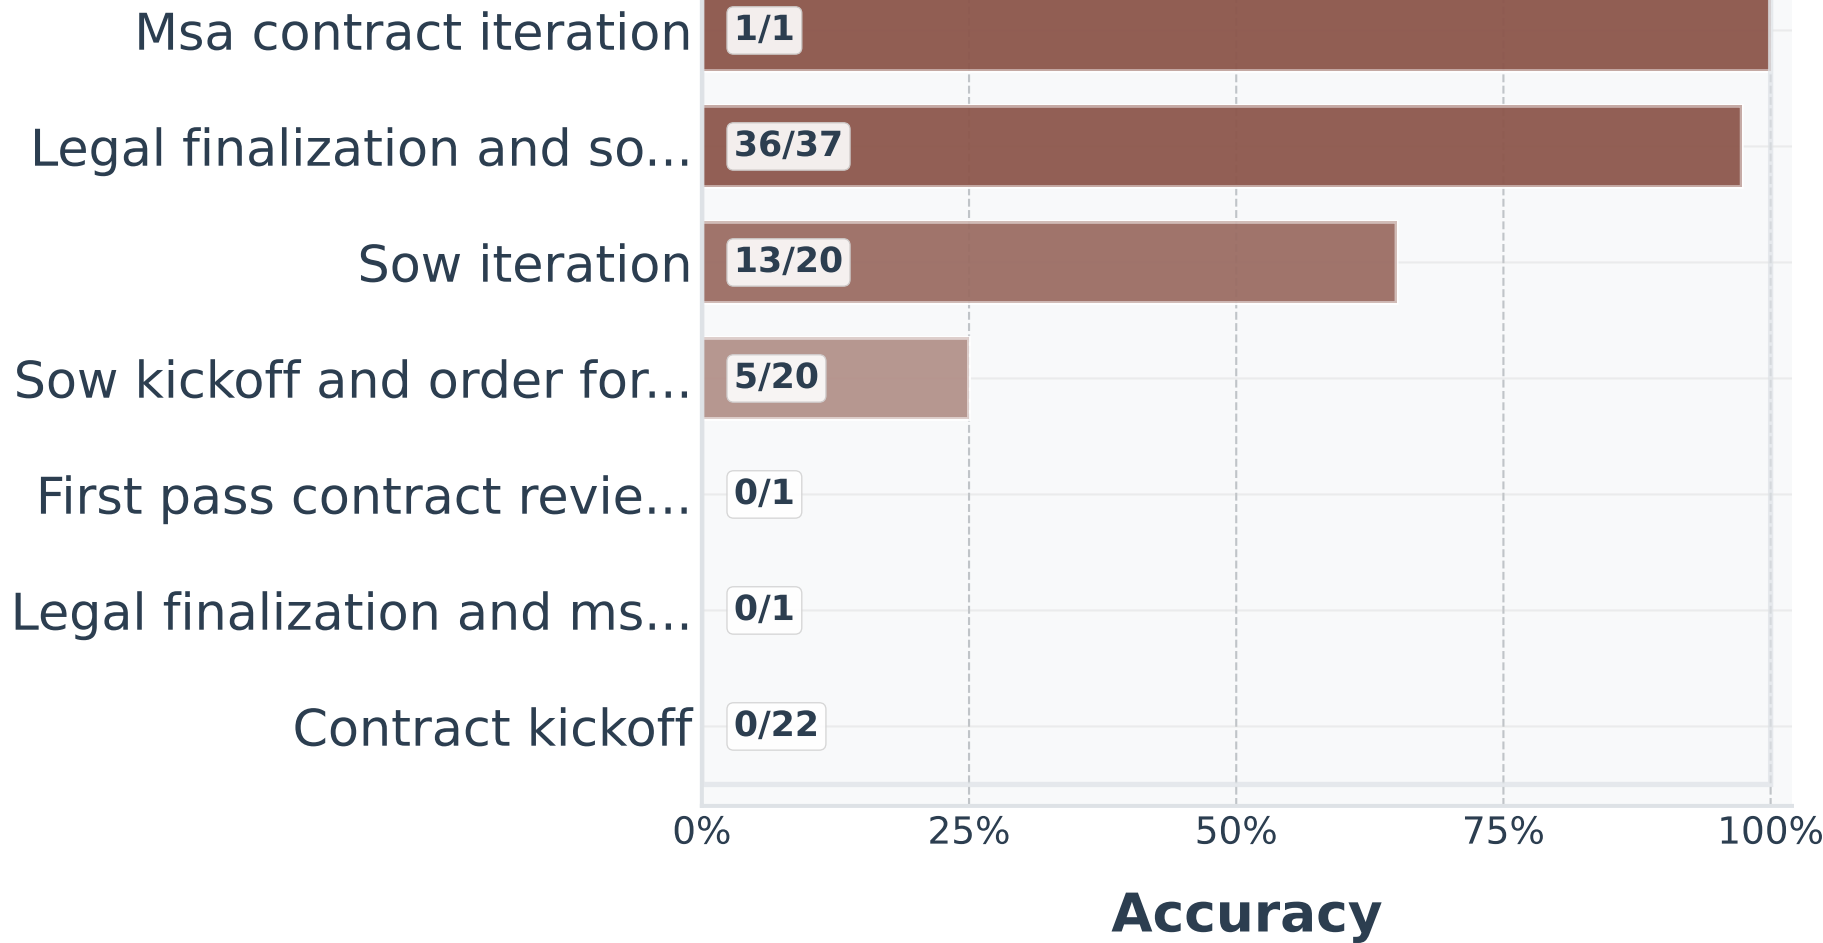

Supplement: supplementary_material [file legal_classification_gemini-2.5-flash_class_accuracy.pdf › entrophy-main/figures/legal_classification_gemini-2.5-flash_class_accuracy.pdf]

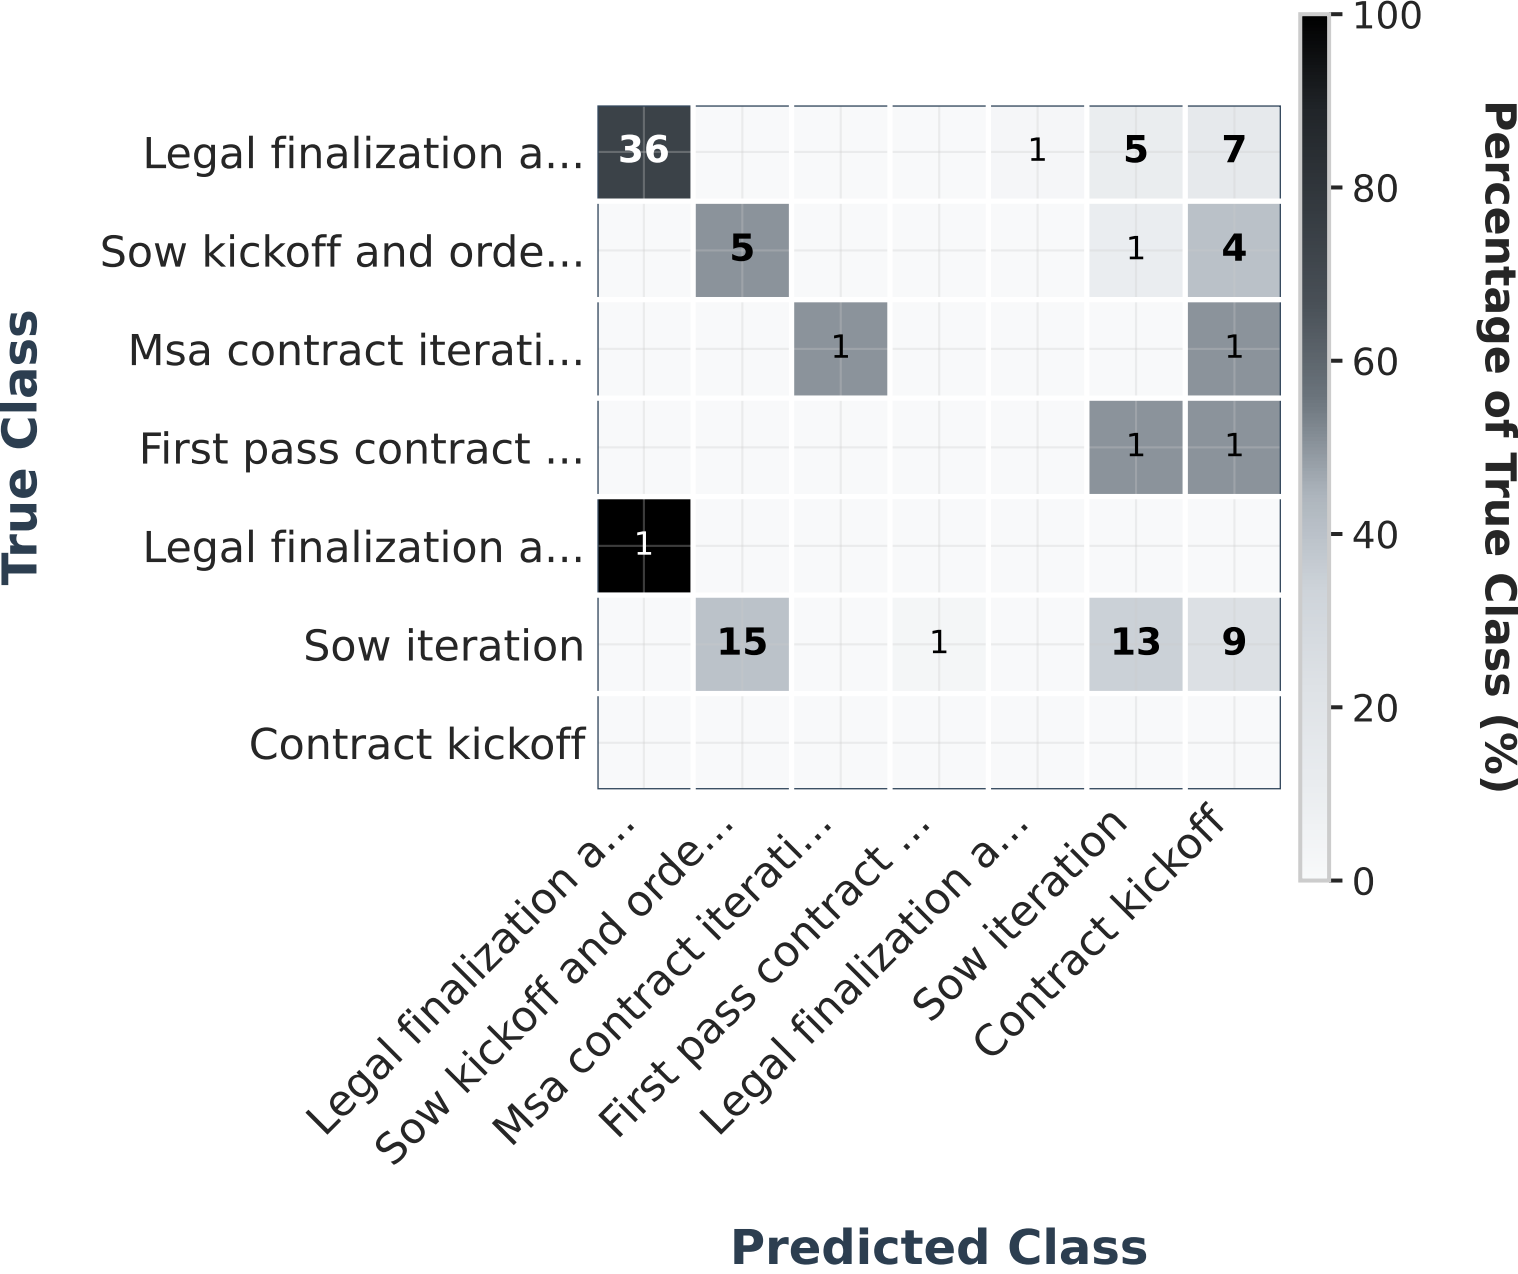

Supplement: supplementary_material [file legal_classification_gemini-2.5-flash_confusion.pdf › entrophy-main/figures/legal_classification_gemini-2.5-flash_confusion.pdf]

True Class

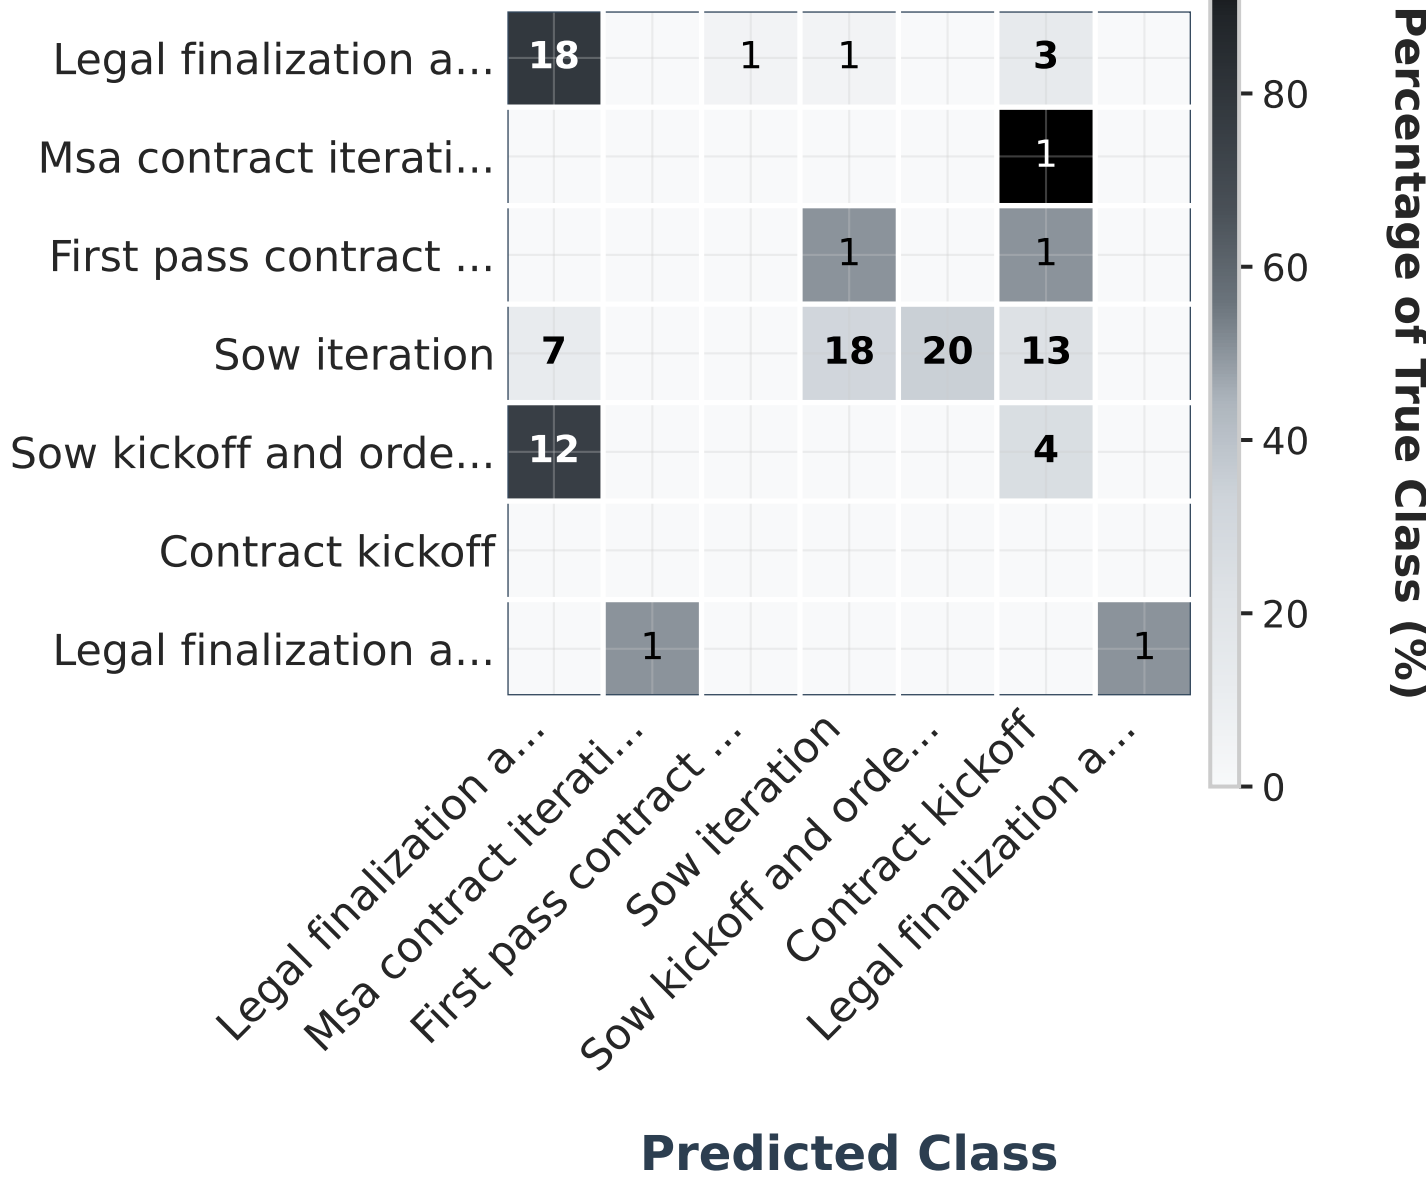

Supplement: supplementary_material [file legal_classification_gpt-4.1_confusion.pdf › entrophy-main/figures/legal_classification_gpt-4.1_confusion.pdf]

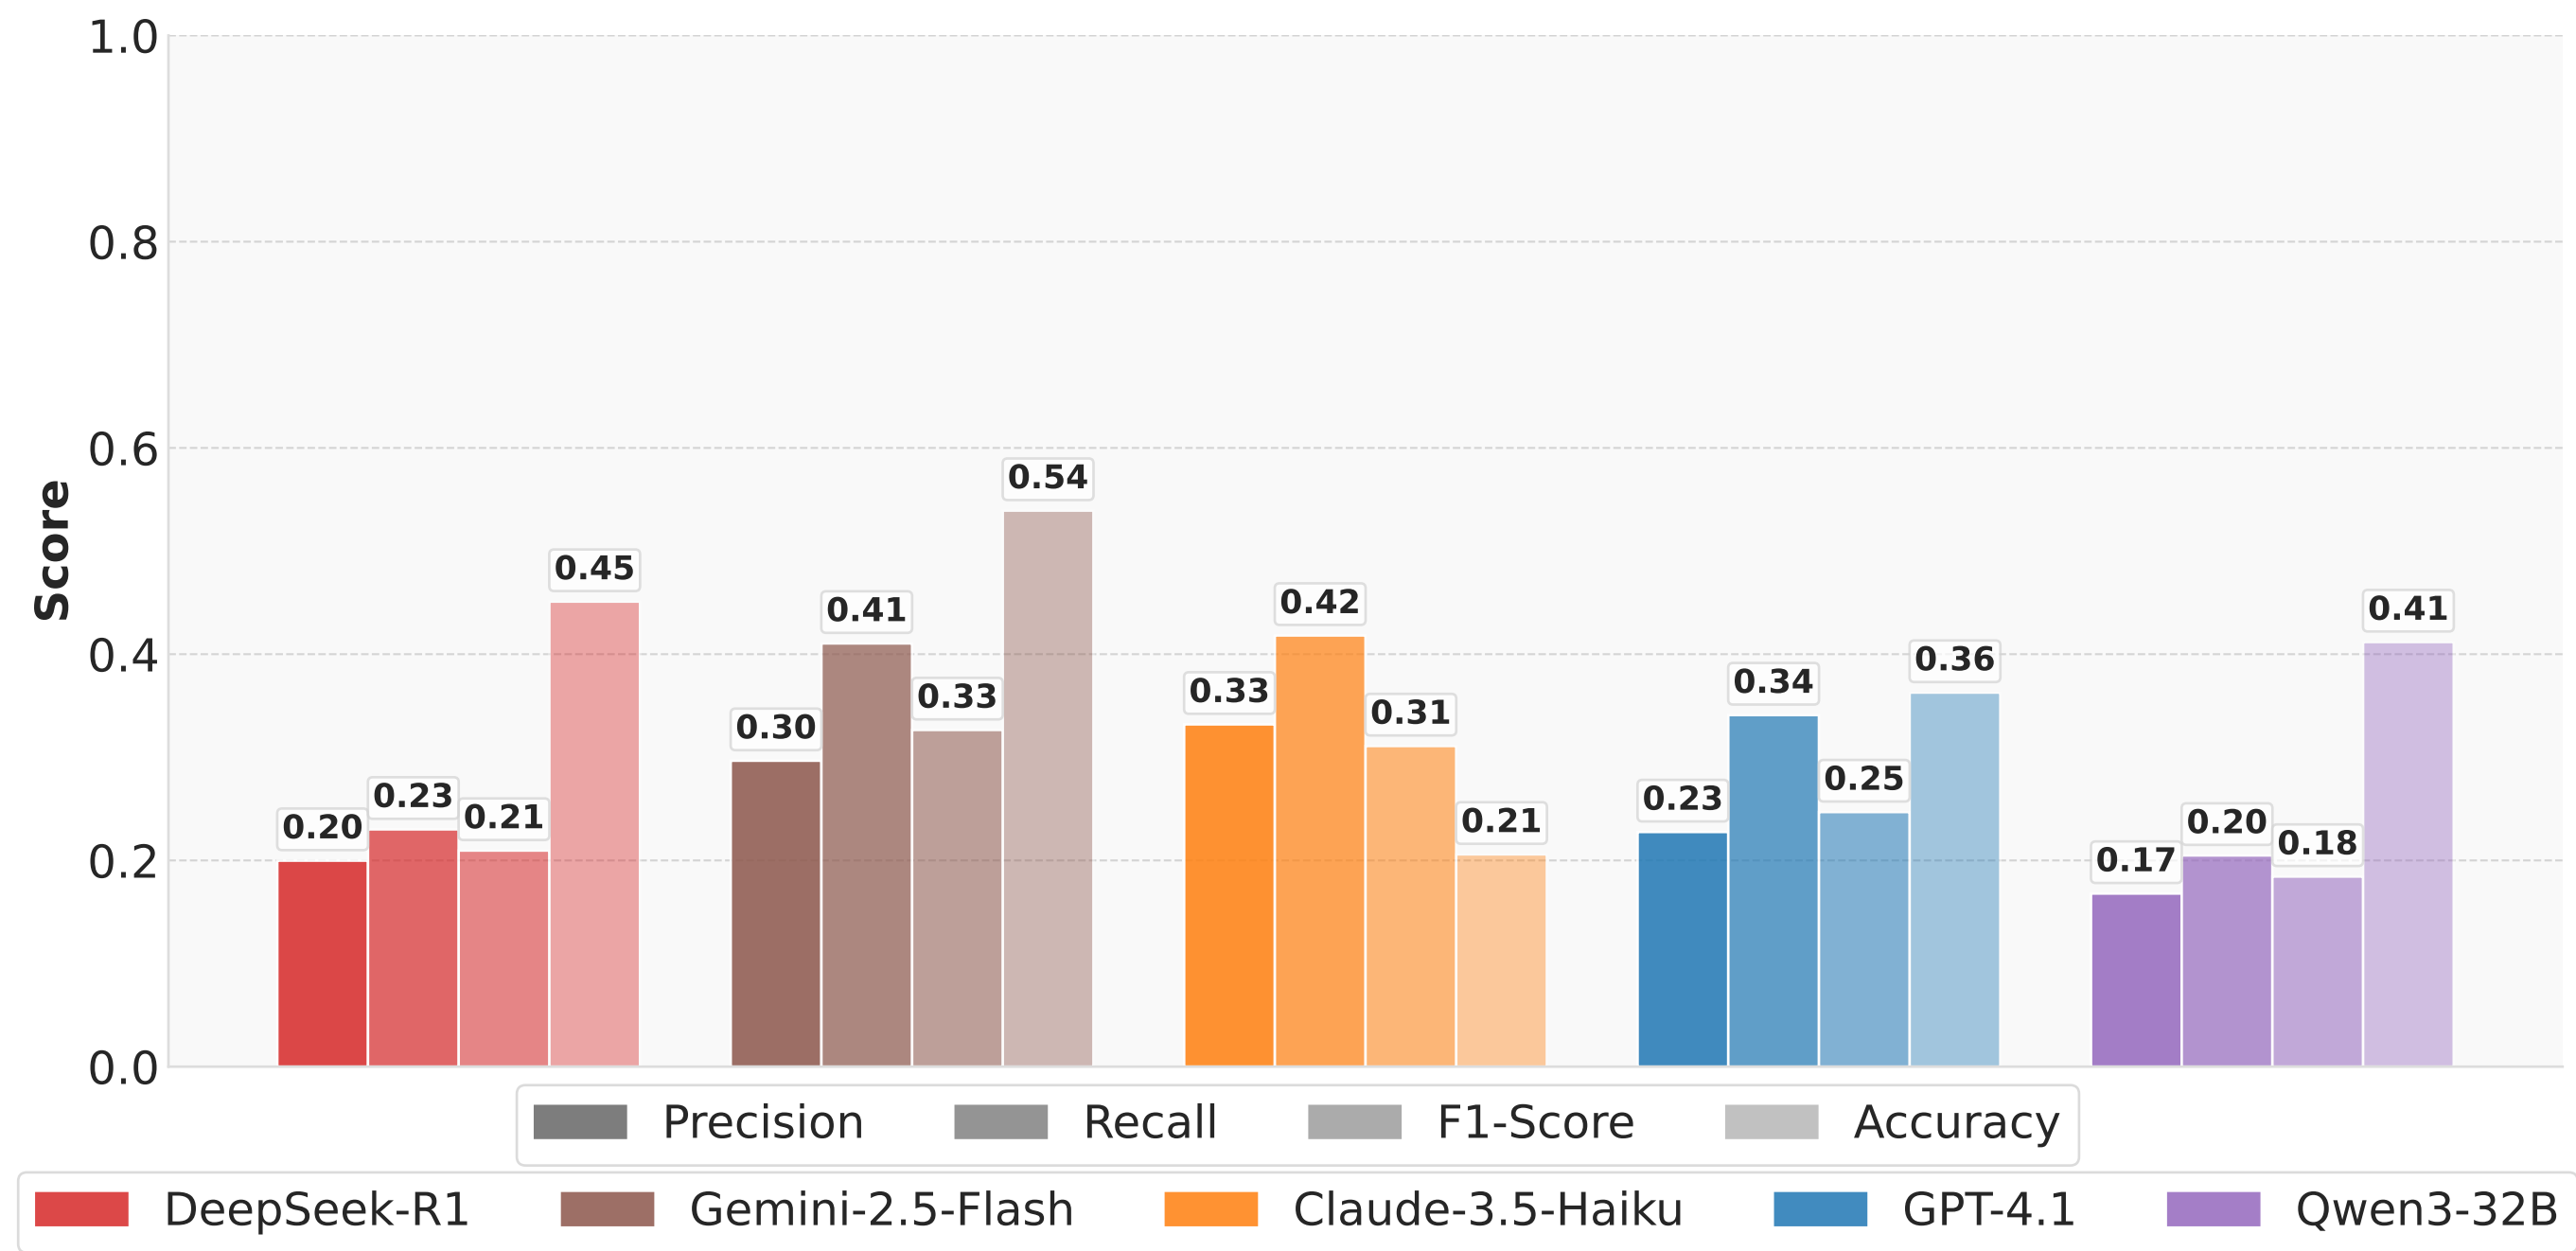

Supplement: supplementary_material [file legal_classification_metrics.pdf › entrophy-main/figures/legal_classification_metrics.pdf]

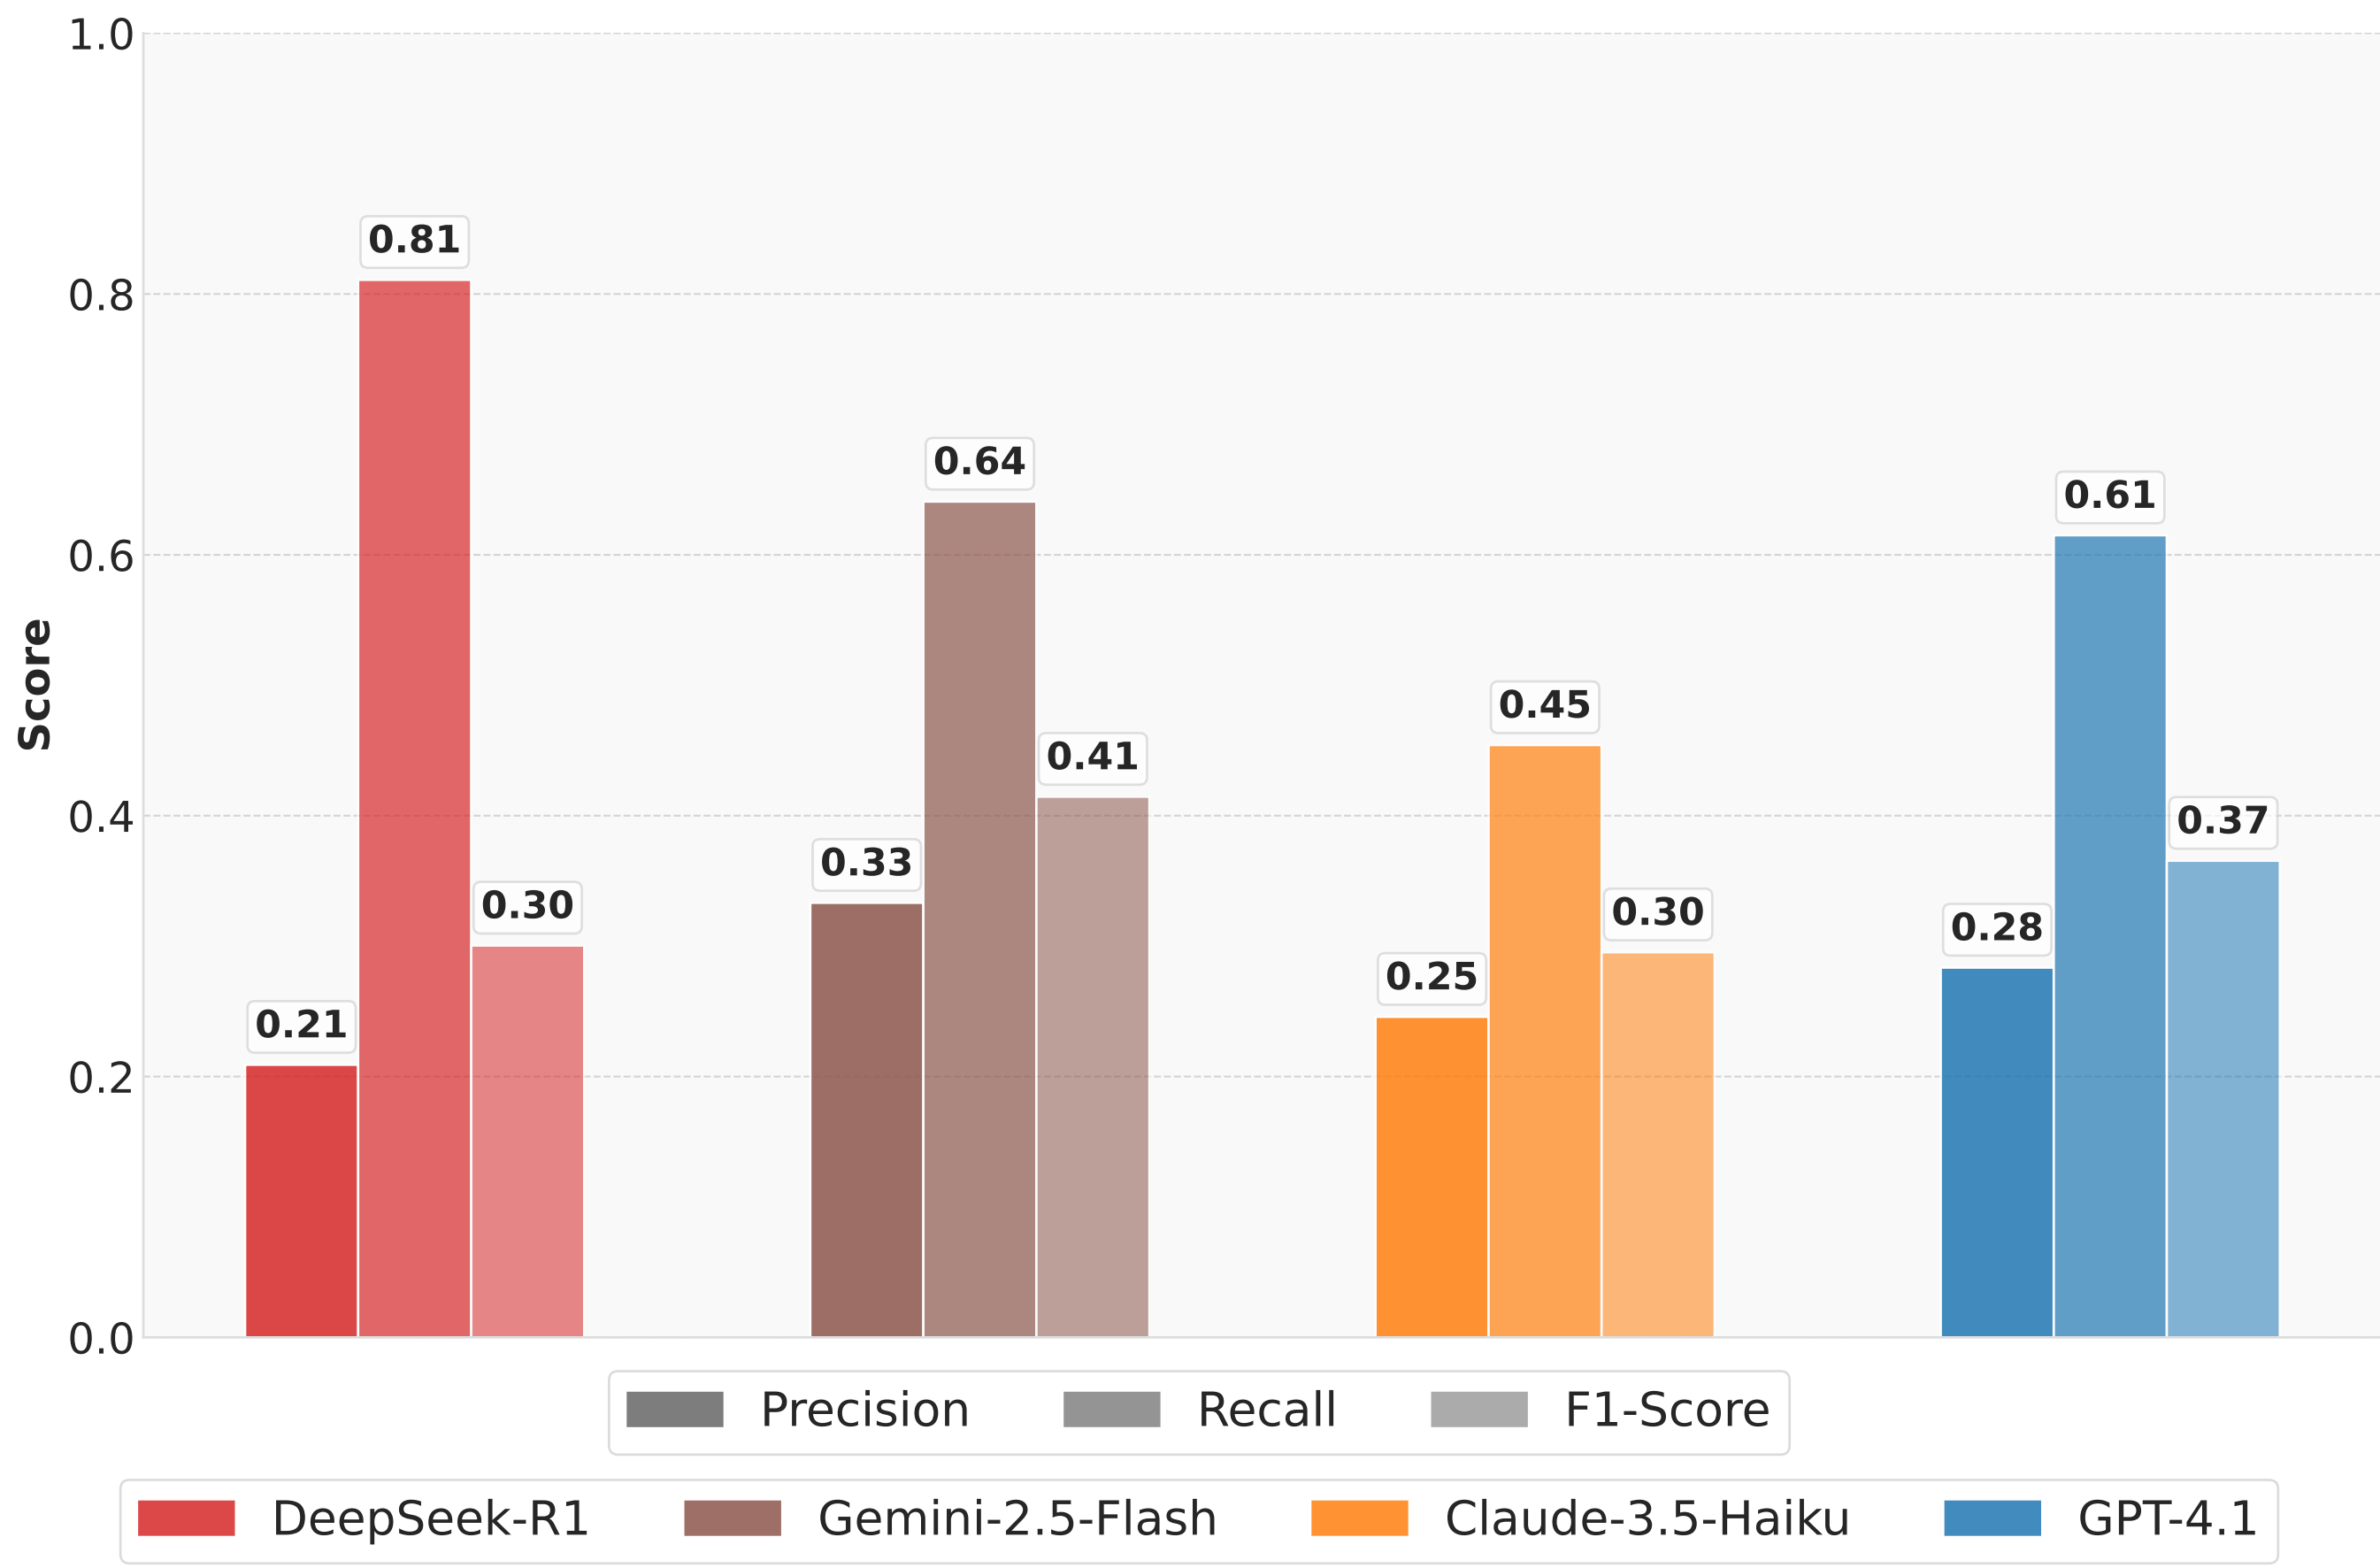

Supplement: supplementary_material [file legal_segmentation_boundary_metrics.pdf › entrophy-main/figures/legal_segmentation_boundary_metrics.pdf]

## HR

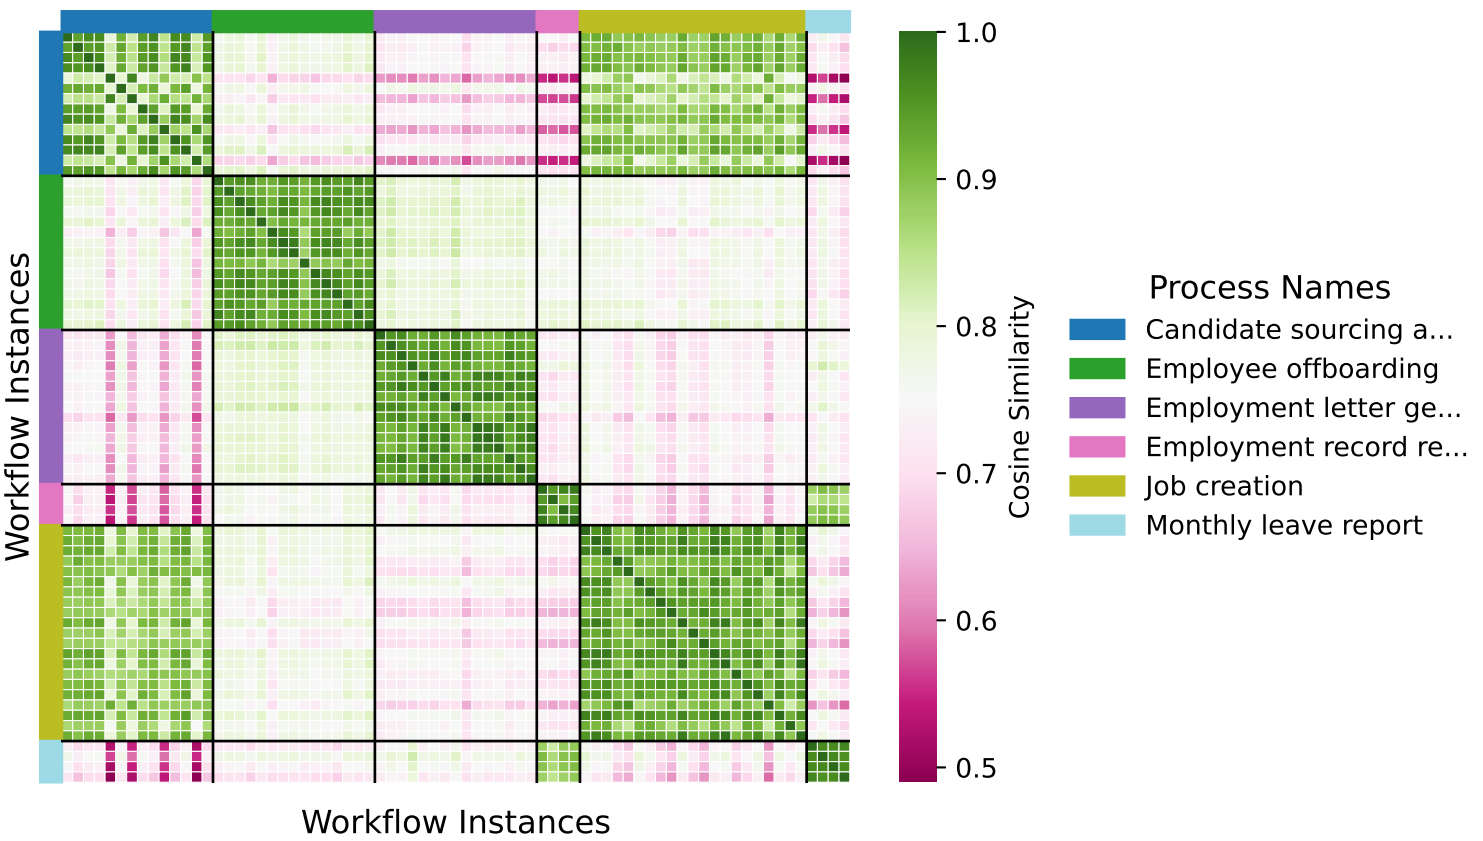

## Legal

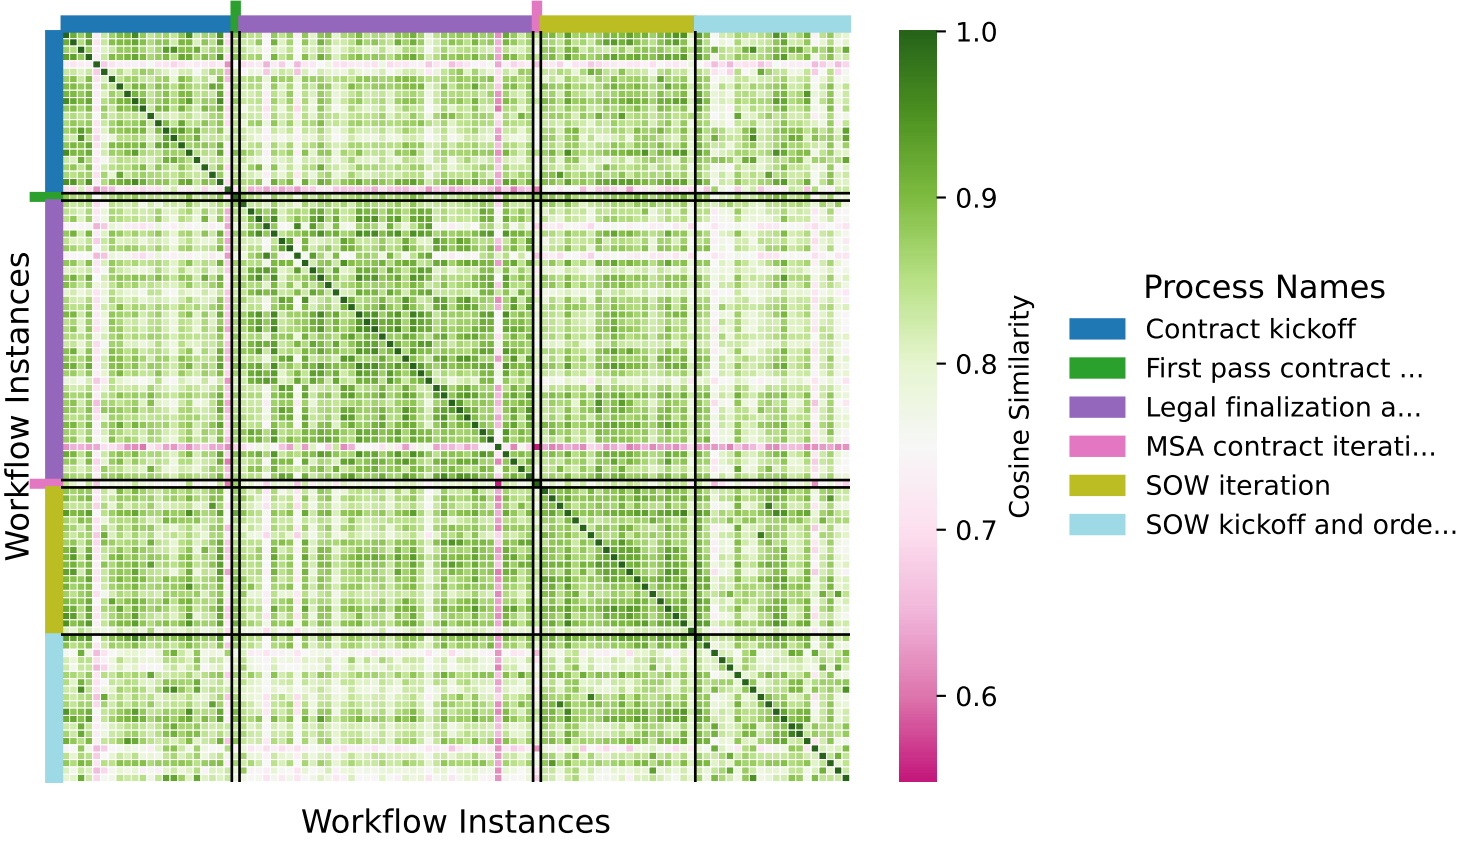

## Finance

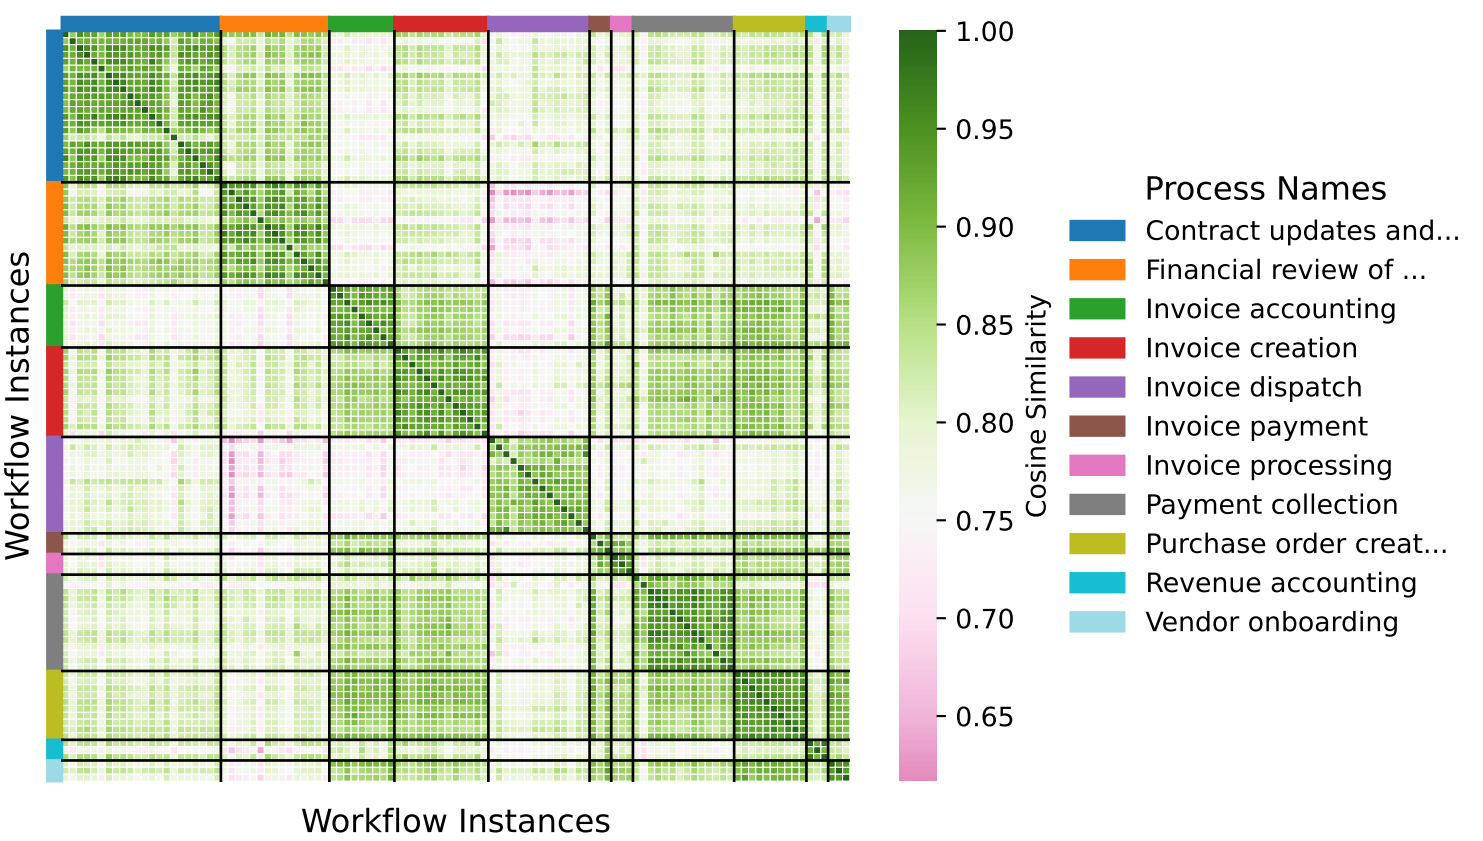

Supplement: supplementary_material [file process_similarity_heatmap.pdf › entrophy-main/src/similarity_analysis/process_similarity_heatmap.pdf]
